# Supplementary material for: Host casein kinase 1-mediated phosphorylation modulates phase separation of a rhabdovirus phosphoprotein and virus infection
Source: eLife. 2022 Feb 22;11:e74884. doi: 10.7554/eLife.74884 (PMC8887900; doi:10.7554/eLife.74884)
Supplement: Figure 1—figure supplement 6—source data 1. — (Related to Figure 1—figure supplement 6C). [file elife-74884-fig1-figsupp6-data1.xlsx]

## Sheet: Sheet1
		Repeats
	Time (s)	1	2	3	4	5	6	7	8	9	10	11	12	13	14	15	Mean	SEM
	0	1	1	1	1	1	1	1	1	1	1	1	1	1	1	1	1	0
	3	0	0	0	0	0	0	0	0	0	0	0	0	0	0	0	0	0
	6	0.048	0.092	0.16	0.012	0.022	0.001	0.115	0.028	0.02	0.229	0.087	0.03	0.077	0.059	0.063	0.0695333	0.0616278
	9	0.063	0.147	0.269	0.024	0.056	0.041	0.199	0.062	0.035	0.331	0.148	0.087	0.285	0.169	0.19	0.1404	0.0990092
	12	0.081	0.204	0.331	0.054	0.102	0.076	0.267	0.107	0.032	0.348	0.208	0.143	0.409	0.281	0.343	0.199067	0.123893
	15	0.108	0.313	0.34	0.066	0.14	0.105	0.322	0.136	0.041	0.378	0.258	0.192	0.488	0.351	0.377	0.241	0.136969
	18	0.12	0.346	0.374	0.094	0.18	0.14	0.368	0.186	0.053	0.372	0.312	0.21	0.479	0.388	0.442	0.270933	0.136738
	21	0.144	0.39	0.381	0.104	0.222	0.167	0.399	0.215	0.067	0.35	0.345	0.256	0.506	0.397	0.486	0.295267	0.137599
	24	0.159	0.431	0.398	0.123	0.265	0.192	0.44	0.261	0.072	0.383	0.371	0.279	0.526	0.402	0.539	0.322733	0.143225
	27	0.172	0.466	0.369	0.138	0.286	0.224	0.453	0.319	0.086	0.384	0.386	0.32	0.532	0.399	0.452	0.3324	0.129922
	30	0.201	0.441	0.386	0.164	0.322	0.255	0.482	0.357	0.106	0.409	0.411	0.367	0.546	0.468	0.503	0.3612	0.129436
	33	0.21	0.465	0.389	0.174	0.353	0.284	0.516	0.386	0.106	0.398	0.407	0.378	0.532	0.547	0.496	0.376067	0.132952
	36	0.232	0.47	0.371	0.185	0.399	0.299	0.521	0.419	0.109	0.373	0.438	0.393	0.537	0.541	0.479	0.3844	0.129156
	39	0.246	0.474	0.385	0.211	0.409	0.342	0.53	0.414	0.136	0.404	0.447	0.397	0.526	0.553	0.514	0.3992	0.12244
	42	0.259	0.477	0.408	0.233	0.445	0.368	0.533	0.456	0.133	0.41	0.456	0.417	0.585	0.601	0.556	0.422467	0.131974
	45	0.295	0.502	0.418	0.249	0.478	0.388	0.519	0.464	0.141	0.445	0.454	0.389	0.559	0.575	0.549	0.428333	0.121669
	48	0.3	0.502	0.413	0.279	0.502	0.407	0.561	0.507	0.158	0.424	0.435	0.42	0.57	0.598	0.586	0.444133	0.124581
	51	0.319	0.508	0.403	0.292	0.519	0.434	0.552	0.538	0.158	0.426	0.464	0.429	0.561	0.593	0.614	0.454	0.124432
	54	0.329	0.464	0.414	0.305	0.554	0.466	0.558	0.523	0.18	0.438	0.441	0.435	0.573	0.601	0.572	0.456867	0.116705
	57	0.336	0.533	0.402	0.306	0.564	0.483	0.523	0.56	0.202	0.419	0.452	0.418	0.551	0.618	0.585	0.463467	0.117066
	60	0.353	0.551	0.412	0.344	0.601	0.516	0.565	0.577	0.191	0.437	0.472	0.43	0.609	0.602	0.571	0.482067	0.120871
	63	0.387	0.524	0.4	0.341	0.627	0.508	0.561	0.6	0.207	0.45	0.47	0.466	0.579	0.663	0.573	0.4904	0.121215
	66	0.4	0.548	0.377	0.363	0.634	0.549	0.57	0.623	0.21	0.473	0.465	0.409	0.59	0.633	0.569	0.4942	0.122757
	69	0.424	0.582	0.374	0.396	0.653	0.551	0.592	0.62	0.222	0.454	0.477	0.427	0.591	0.633	0.599	0.506333	0.122034
	72	0.428	0.604	0.374	0.405	0.662	0.579	0.572	0.62	0.233	0.458	0.475	0.418	0.615	0.644	0.623	0.514	0.12522
	75	0.442	0.563	0.362	0.437	0.706	0.596	0.565	0.626	0.218	0.463	0.479	0.411	0.601	0.649	0.594	0.514133	0.128061
	78	0.462	0.548	0.357	0.45	0.679	0.618	0.557	0.635	0.255	0.482	0.484	0.416	0.622	0.641	0.618	0.5216	0.12056
	81	0.484	0.582	0.385	0.453	0.697	0.623	0.583	0.652	0.261	0.461	0.479	0.414	0.622	0.684	0.613	0.532867	0.124823
	84	0.493	0.594	0.346	0.458	0.731	0.621	0.569	0.619	0.281	0.472	0.492	0.411	0.63	0.66	0.659	0.535733	0.127236
	87	0.513	0.587	0.367	0.491	0.732	0.654	0.557	0.671	0.291	0.466	0.479	0.429	0.666	0.648	0.648	0.5466	0.126674
	90	0.532	0.563	0.358	0.488	0.736	0.652	0.588	0.667	0.316	0.489	0.48	0.418	0.673	0.642	0.657	0.5506	0.124548
	93	0.533	0.573	0.351	0.513	0.752	0.689	0.596	0.629	0.308	0.463	0.485	0.427	0.642	0.711	0.622	0.552933	0.129614
	96	0.556	0.549	0.345	0.519	0.771	0.662	0.567	0.628	0.291	0.445	0.481	0.444	0.655	0.695	0.655	0.550867	0.133081
	99	0.549	0.579	0.352	0.545	0.768	0.681	0.558	0.678	0.312	0.324	0.479	0.449	0.609	0.688	0.685	0.5504	0.142657
	102	0.571	0.583	0.344	0.552	0.783	0.704	0.566	0.661	0.326	0.286	0.503	0.44	0.659	0.728	0.693	0.559933	0.153824
	105	0.584	0.579	0.332	0.566	0.801	0.736	0.565	0.696	0.35	0.308	0.473	0.439	0.66	0.691	0.692	0.5648	0.154594
	108	0.579	0.563	0.334	0.568	0.773	0.719	0.58	0.645	0.364	0.339	0.485	0.426	0.634	0.716	0.704	0.561933	0.144201
	112	0.603	0.569	0.314	0.587	0.782	0.738	0.563	0.654	0.4	0.397	0.498	0.438	0.651	0.712	0.7	0.573733	0.139397
	115	0.607	0.582	0.317	0.6	0.803	0.734	0.598	0.66	0.388	0.281	0.499	0.46	0.633	0.688	0.715	0.571	0.153339
	118	0.616	0.608	0.314	0.627	0.778	0.78	0.58	0.65	0.393	0.2	0.497	0.454	0.635	0.729	0.694	0.570333	0.16863
	121	0.635	0.625	0.33	0.61	0.809	0.768	0.576	0.646	0.387	0.233	0.508	0.468	0.68	0.736	0.707	0.5812	0.16614
	124	0.619	0.597	0.322	0.638	0.79	0.773	0.586	0.641	0.411	0.276	0.496	0.471	0.665	0.714	0.698	0.5798	0.154888
	127	0.627	0.615	0.315	0.634	0.786	0.788	0.566	0.623	0.408	0.27	0.516	0.468	0.675	0.702	0.683	0.5784	0.156096
	130	0.634	0.637	0.309	0.643	0.807	0.771	0.59	0.632	0.39	0.348	0.486	0.476	0.68	0.719	0.694	0.587733	0.152453
	133	0.641	0.645	0.317	0.659	0.827	0.795	0.564	0.664	0.41	0.239	0.544	0.471	0.674	0.712	0.717	0.591933	0.168852
	136	0.637	0.627	0.299	0.648	0.821	0.762	0.558	0.645	0.431	0.268	0.545	0.505	0.652	0.725	0.72	0.589533	0.159418
	139	0.635	0.631	0.277	0.64	0.851	0.813	0.58	0.634	0.41	0.284	0.505	0.477	0.642	0.737	0.71	0.5884	0.170873
	142	0.655	0.628	0.286	0.68	0.826	0.803	0.578	0.696	0.426	0.272	0.529	0.495	0.657	0.76	0.74	0.602067	0.171777
	145	0.662	0.603	0.282	0.663	0.861	0.835	0.571	0.702	0.449	0.366	0.509	0.492	0.682	0.749	0.724	0.61	0.165581
	148	0.677	0.614	0.272	0.679	0.835	0.826	0.578	0.685	0.468	0.272	0.508	0.498	0.585	0.745	0.74	0.5988	0.172929
	151	0.688	0.619	0.287	0.676	0.817	0.8	0.622	0.699	0.502	0.284	0.524	0.488	0.697	0.781	0.73	0.614267	0.16755
