# Supplementary material for: Host casein kinase 1-mediated phosphorylation modulates phase separation of a rhabdovirus phosphoprotein and virus infection
Source: eLife. 2022 Feb 22;11:e74884. doi: 10.7554/eLife.74884 (PMC8887900; doi:10.7554/eLife.74884)
Supplement: Figure 1—source data 1. — (Related to Figure 1D). [file elife-74884-fig1-data1.xlsx]

## Sheet: Sheet1
		Repeats
	Time (s)	1	2	3	4	5	6	7	8	9	10	11	12	13	14	15	Mean	SEM
	0	1	1	1	1	1	1	1	1	1	1	1	1	1	1	1	1	0
	3	0	0	0	0	0	0	0	0	0	0	0	0	0	0	0	0	0
	6	0.087996	0.048513	0.129272	0.192171	0.084387	0.049989	0.15636	0.03824	0.018224	0.266799	0.306317	0.26694	0.119216	0.199649	0.073658	0.135849	0.0920186
	9	0.131697	0.077401	0.229538	0.240881	0.13193	0.099008	0.287515	0.138384	0.051312	0.391078	0.410088	0.423538	0.203465	0.3441	0.201327	0.224084	0.123442
	12	0.182455	0.100448	0.27074	0.225858	0.163444	0.171078	0.247655	0.239694	0.078659	0.475378	0.504641	0.492593	0.285281	0.464656	0.299591	0.280145	0.141868
	15	0.213401	0.127839	0.314079	0.255583	0.200132	0.197805	0.263575	0.272459	0.096224	0.502075	0.484528	0.545881	0.353343	0.50943	0.335817	0.311478	0.142602
	18	0.27621	0.159461	0.340701	0.281141	0.253745	0.223141	0.257703	0.303431	0.124307	0.501824	0.501216	0.587056	0.442165	0.49754	0.364278	0.340928	0.137557
	21	0.300511	0.198566	0.353207	0.338596	0.281524	0.227578	0.306179	0.310516	0.121453	0.567419	0.546769	0.585093	0.492976	0.523413	0.388542	0.369489	0.143545
	24	0.337095	0.198915	0.341475	0.303119	0.313699	0.252678	0.295057	0.320168	0.142369	0.550065	0.611705	0.626381	0.554827	0.539777	0.375033	0.384158	0.153313
	27	0.382487	0.230774	0.357665	0.347751	0.338132	0.28912	0.284698	0.340833	0.15614	0.614057	0.578021	0.642284	0.588045	0.567867	0.414223	0.408806	0.152279
	30	0.407071	0.247451	0.364939	0.350509	0.368362	0.317108	0.254028	0.356351	0.209235	0.604965	0.650164	0.630737	0.625885	0.5752	0.383348	0.423024	0.152679
	33	0.435219	0.274324	0.38472	0.357258	0.375832	0.310623	0.229348	0.36637	0.222812	0.59929	0.654562	0.683991	0.653014	0.574302	0.394444	0.434407	0.158375
	36	0.472165	0.283304	0.373886	0.352974	0.396452	0.318762	0.31291	0.39099	0.224909	0.621644	0.673769	0.66506	0.648747	0.617165	0.385971	0.449247	0.15442
	39	0.488513	0.291013	0.410971	0.35943	0.388437	0.332808	0.329308	0.391383	0.218521	0.606316	0.630448	0.665151	0.702407	0.592718	0.398851	0.453752	0.150087
	42	0.475014	0.300972	0.371595	0.369465	0.407812	0.33336	0.335036	0.377213	0.261088	0.646217	0.647644	0.698249	0.670656	0.610466	0.398379	0.460211	0.151135
	45	0.490013	0.305755	0.401343	0.402741	0.414738	0.346592	0.37165	0.416173	0.278588	0.605216	0.662917	0.688233	0.700745	0.632409	0.405671	0.474852	0.144083
	48	0.499487	0.328543	0.400167	0.416826	0.430961	0.352342	0.346803	0.434652	0.278707	0.653804	0.710923	0.681575	0.734219	0.624111	0.412308	0.487029	0.152621
	51	0.5165	0.361381	0.417441	0.420699	0.439598	0.388022	0.359954	0.42593	0.303233	0.656757	0.676023	0.655146	0.722482	0.625413	0.380987	0.489971	0.1389
	54	0.530936	0.370203	0.41063	0.405294	0.436408	0.385476	0.353701	0.425327	0.306897	0.634847	0.739435	0.689628	0.759246	0.621977	0.351241	0.49475	0.15387
	57	0.489228	0.36793	0.420691	0.399425	0.422791	0.386132	0.376566	0.446307	0.317663	0.659267	0.698767	0.718087	0.755395	0.619283	0.374744	0.496818	0.149209
	60	0.498913	0.403198	0.437314	0.425599	0.439015	0.394429	0.37258	0.471503	0.335964	0.656352	0.725511	0.694857	0.767278	0.638663	0.378102	0.509285	0.145199
	63	0.504963	0.439637	0.421743	0.431028	0.434229	0.395584	0.371387	0.474227	0.35114	0.678011	0.720648	0.707141	0.757229	0.631337	0.37519	0.5129	0.143657
	66	0.48505	0.455279	0.415955	0.433639	0.429639	0.425935	0.389503	0.471084	0.32162	0.642221	0.726991	0.714106	0.781289	0.630093	0.387178	0.513972	0.144527
	69	0.504389	0.458227	0.441493	0.435107	0.429016	0.408738	0.411032	0.475851	0.359787	0.6944	0.66579	0.71245	0.776264	0.629277	0.372908	0.518315	0.137709
	72	0.467473	0.461457	0.428244	0.438804	0.445434	0.427379	0.4175	0.502724	0.353712	0.694323	0.72361	0.720333	0.779468	0.639668	0.382037	0.525478	0.142929
	75	0.475708	0.475423	0.436076	0.467678	0.440104	0.454999	0.442633	0.515034	0.361582	0.708897	0.786535	0.705111	0.774259	0.650726	0.338309	0.535538	0.148218
	78	0.491544	0.472249	0.472202	0.47073	0.43598	0.42604	0.423085	0.539405	0.372704	0.70911	0.73455	0.704079	0.770054	0.627143	0.331829	0.532047	0.140934
	81	0.503393	0.481049	0.49449	0.475073	0.440454	0.445757	0.397785	0.496176	0.365959	0.690983	0.753846	0.739128	0.75202	0.652744	0.343109	0.535464	0.143085
	84	0.481527	0.481758	0.473749	0.463277	0.456406	0.463821	0.375158	0.512742	0.408105	0.738297	0.776943	0.739775	0.785642	0.673096	0.400346	0.548709	0.148079
	87	0.454678	0.496962	0.468177	0.511781	0.488737	0.4728	0.38924	0.535726	0.394853	0.70689	0.578773	0.72039	0.784346	0.645798	0.331016	0.532011	0.131355
	90	0.479695	0.501035	0.48381	0.456557	0.465432	0.466499	0.436022	0.519932	0.411629	0.705558	0.763107	0.736428	0.792354	0.679993	0.322202	0.548017	0.146252
	93	0.453249	0.484898	0.464277	0.466358	0.480411	0.467024	0.42182	0.527947	0.401295	0.696929	0.814318	0.73154	0.814092	0.657424	0.321337	0.546861	0.155042
	96	0.466477	0.506966	0.452576	0.383843	0.480644	0.490023	0.440461	0.516016	0.412742	0.680308	0.728163	0.719993	0.8137	0.703864	0.334059	0.541989	0.147073
	99	0.468309	0.507416	0.470189	0.265941	0.497607	0.495458	0.459651	0.547145	0.434717	0.712526	0.846101	0.740103	0.820694	0.664815	0.359451	0.552675	0.168102
	102	0.449564	0.510162	0.484646	0.235629	0.46337	0.487004	0.457169	0.583958	0.437571	0.699902	0.76346	0.733842	0.801303	0.673863	0.374823	0.543751	0.160154
	105	0.45049	0.486946	0.504551	0.221104	0.51033	0.485113	0.452491	0.558761	0.4588	0.684613	0.812041	0.735453	0.793479	0.670666	0.360789	0.545708	0.164392
	108	0.444088	0.515777	0.493623	0.207107	0.486208	0.491336	0.475285	0.534233	0.445894	0.687045	0.787685	0.71642	0.797146	0.672981	0.361445	0.541085	0.162757
	112	0.429984	0.522428	0.515726	0.285308	0.488853	0.494959	0.444638	0.541331	0.458206	0.696871	0.766732	0.721842	0.809886	0.662541	0.405855	0.549677	0.149243
	115	0.415638	0.537001	0.507182	0.240324	0.485624	0.507351	0.463184	0.554505	0.455698	0.677162	0.787154	0.734977	0.795129	0.701655	0.364698	0.548485	0.160887
	118	0.41585	0.524814	0.494428	0.209102	0.481189	0.519192	0.460582	0.58769	0.466853	0.693995	0.826784	0.743404	0.809764	0.707201	0.369262	0.554007	0.173062
	121	0.437141	0.518759	0.512816	0.325098	0.503171	0.520374	0.474067	0.575196	0.453904	0.64782	0.790315	0.73965	0.792427	0.674736	0.351713	0.554479	0.146633
	124	0.425967	0.541064	0.531358	0.215323	0.515815	0.529852	0.476072	0.558709	0.450531	0.686775	0.782712	0.744992	0.819544	0.680529	0.366429	0.555045	0.164474
	127	0.446927	0.545486	0.504024	0.203468	0.524647	0.547259	0.477218	0.582124	0.436555	0.689999	0.83894	0.740376	0.797611	0.685753	0.350978	0.558091	0.171212
	130	0.442225	0.574723	0.521205	0.240236	0.486441	0.537833	0.467456	0.564838	0.452293	0.701253	0.742817	0.758706	0.807331	0.699719	0.373092	0.558011	0.158646
	133	0.440675	0.543337	0.521174	0.239796	0.501459	0.535733	0.48328	0.589563	0.446737	0.696099	0.75	0.771024	0.81886	0.69466	0.354467	0.559124	0.16228
	136	0.419605	0.542707	0.53433	0.326741	0.491927	0.517591	0.478913	0.579034	0.445191	0.695539	0.768455	0.741238	0.831648	0.708025	0.322989	0.560262	0.157702
	139	0.436698	0.547332	0.545722	0.254027	0.490643	0.548178	0.489796	0.597001	0.460735	0.729359	0.808837	0.763651	0.790385	0.682613	0.360448	0.567028	0.162471
	142	0.411219	0.545745	0.545939	0.306993	0.500136	0.542481	0.49753	0.616867	0.451601	0.698164	0.767085	0.743121	0.830071	0.680883	0.344158	0.565466	0.1555
	145	0.417833	0.542909	0.526096	0.289827	0.488737	0.517355	0.521422	0.588711	0.469426	0.678223	0.810715	0.740625	0.802844	0.707061	0.356566	0.56389	0.156588
	148	0.414309	0.539871	0.535599	0.296458	0.492627	0.505251	0.526482	0.598795	0.478776	0.706059	0.802803	0.758638	0.793234	0.695756	0.392162	0.569121	0.153049
	151	0.409024	0.533873	0.531265	0.281992	0.461464	0.522999	0.511039	0.605238	0.461362	0.781364	0.783176	0.756267	0.792244	0.722823	0.345549	0.566645	0.166893
