# Supplementary material for: Host casein kinase 1-mediated phosphorylation modulates phase separation of a rhabdovirus phosphoprotein and virus infection
Source: eLife. 2022 Feb 22;11:e74884. doi: 10.7554/eLife.74884 (PMC8887900; doi:10.7554/eLife.74884)
Supplement: Figure 2—source data 1. — (Related to Figure 2E). [file elife-74884-fig2-data1.xlsx]

## Sheet: Sheet1
		Repeats
	Time (s)	1	2	3	4	5	6	7	8	9	10	11	12	Mean	SEM
	0	1	1	1	1	1	1	1	1	1	1	1	1	1	0
	20	0	0	0	0	0	0	0	0	0	0	0	0	0	0
	40	0.359245	0.005573	0.194746	0.154413	0.124783	0.160589	0.143316	0.018088	0.184771	0.010075	0.182154	0.006803	0.128713	0.105204
	60	0.54393	0.31014	0.29663	0.226248	0.17544	0.228471	0.222771	0.165132	0.256734	0.119989	0.272393	0.09554	0.242785	0.115758
	80	0.641853	0.471556	0.365765	0.255207	0.198776	0.230875	0.280849	0.258479	0.321482	0.190254	0.31202	0.115882	0.303583	0.140174
	100	0.719856	0.577726	0.407935	0.29322	0.21849	0.255339	0.335662	0.304213	0.399066	0.223512	0.337668	0.14361	0.351358	0.160942
	120	0.765556	0.644194	0.437463	0.317801	0.227702	0.270155	0.360269	0.325692	0.449266	0.226968	0.361981	0.166753	0.379483	0.175353
	140	0.794525	0.695545	0.462696	0.337831	0.233027	0.278774	0.371176	0.363562	0.518117	0.244135	0.349217	0.163835	0.401037	0.188803
	160	0.82014	0.731109	0.479079	0.342085	0.234615	0.278877	0.382157	0.388	0.482174	0.253477	0.366516	0.169154	0.410615	0.195291
	180	0.850102	0.77206	0.497385	0.354125	0.235789	0.279289	0.378947	0.420751	0.483594	0.2457	0.394747	0.154998	0.422291	0.208873
	200	0.857826	0.786486	0.509664	0.357377	0.233871	0.273057	0.358663	0.430543	0.538403	0.277996	0.398665	0.125469	0.429002	0.217107
	220	0.859338	0.805368	0.514426	0.345665	0.229323	0.284233	0.361691	0.456361	0.509482	0.254047	0.419813	0.118016	0.429814	0.221783
	240	0.870354	0.788947	0.517526	0.338738	0.211378	0.27752	0.362074	0.459419	0.55052	0.3047	0.422945	0.13584	0.436663	0.219823
	260	0.871948	0.817297	0.53126	0.328887	0.2	0.273675	0.372088	0.471289	0.566177	0.270986	0.403285	0.114198	0.435091	0.232018
	280	0.868967	0.821062	0.534048	0.324853	0.193004	0.258344	0.343177	0.497307	0.587241	0.270578	0.417418	0.089821	0.433818	0.239517
	300	0.871679	0.821659	0.528333	0.335877	0.181923	0.244214	0.365193	0.507032	0.59012	0.261432	0.424878	0.072714	0.433755	0.243975
	320	0.879651	0.826095	0.521458	0.332937	0.177524	0.234343	0.360214	0.647693	0.554293	0.251879	0.456258	0.061259	0.441967	0.254642
	340	0.87611	0.838565	0.526133	0.326182	0.165931	0.23618	0.342411	0.837661	0.556802	0.252286	0.43831	0.05499	0.454297	0.277717
	360	0.876897	0.844548	0.514998	0.325166	0.165468	0.205449	0.313171	0.987033	0.546903	0.27617	0.44529	0.041334	0.461869	0.303098
	380	0.872445	0.864231	0.517613	0.330013	0.153825	0.196831	0.314339	0.990424	0.546591	0.277491	0.383557	0.044852	0.457684	0.307221
	400	0.88402	0.871705	0.511777	0.313751	0.152071	0.190839	0.27213	0.997855	0.558495	0.269062	0.390521	0.030763	0.453582	0.316221
