# Supplementary material for: Host casein kinase 1-mediated phosphorylation modulates phase separation of a rhabdovirus phosphoprotein and virus infection
Source: eLife. 2022 Feb 22;11:e74884. doi: 10.7554/eLife.74884 (PMC8887900; doi:10.7554/eLife.74884)
Supplement: Figure 4—figure supplement 2—source data 1. — (Related to Figure 4—figure supplement 2B). [file elife-74884-fig4-figsupp2-data1.xlsx]

## Sheet: Sheet1
		Repeats
	Time (s)	1	2	3	4	5	6	7	8	9	10	11	12	13	14	15	Mean	SEM
	0	1	1	1	1	1	1	1	1	1	1	1	1	1	1	1	1	0
	3	0	0	0	0	0	0	0	0	0	0	0	0	0	0	0	0	0
	6	0.049	0.094	0.094	0.047	0.046	0.017	0.089	0.019	0.058	0.01	0.002	0.013	0.006	0.028	0.028	0.04	0.0318591
	9	0.072	0.136	0.172	0.062	0.108	0.039	0.144	0.068	0.12	0.051	0.017	0.056	0.069	0.047	0.056	0.0811333	0.0442765
	12	0.106	0.2	0.238	0.081	0.141	0.088	0.21	0.135	0.163	0.105	0.039	0.127	0.118	0.072	0.063	0.125733	0.0570582
	15	0.132	0.226	0.3	0.092	0.178	0.142	0.253	0.221	0.22	0.163	0.052	0.158	0.165	0.082	0.094	0.1652	0.0695487
	18	0.151	0.273	0.337	0.121	0.24	0.174	0.294	0.27	0.247	0.206	0.065	0.206	0.215	0.094	0.106	0.199933	0.0799799
	21	0.194	0.308	0.38	0.141	0.262	0.21	0.345	0.335	0.305	0.238	0.08	0.246	0.25	0.124	0.129	0.236467	0.0898927
	24	0.223	0.326	0.399	0.15	0.285	0.264	0.404	0.341	0.351	0.275	0.098	0.288	0.315	0.132	0.155	0.267067	0.0964746
	27	0.25	0.375	0.42	0.177	0.348	0.271	0.424	0.392	0.403	0.324	0.107	0.322	0.33	0.141	0.168	0.2968	0.1059
	30	0.28	0.393	0.405	0.228	0.361	0.349	0.473	0.461	0.434	0.356	0.126	0.333	0.393	0.166	0.18	0.3292	0.109513
	33	0.296	0.436	0.45	0.258	0.396	0.38	0.529	0.482	0.495	0.417	0.138	0.377	0.43	0.174	0.214	0.3648	0.121017
	36	0.338	0.43	0.448	0.262	0.421	0.401	0.569	0.499	0.521	0.449	0.153	0.451	0.449	0.174	0.239	0.386933	0.126034
	39	0.355	0.495	0.455	0.305	0.459	0.413	0.585	0.539	0.54	0.49	0.164	0.465	0.479	0.191	0.249	0.412267	0.130489
	42	0.386	0.501	0.449	0.272	0.504	0.454	0.58	0.554	0.569	0.51	0.179	0.499	0.52	0.205	0.268	0.43	0.134876
	45	0.415	0.504	0.46	0.331	0.521	0.459	0.621	0.567	0.577	0.561	0.204	0.544	0.542	0.212	0.294	0.454133	0.134548
	48	0.435	0.533	0.455	0.362	0.528	0.489	0.592	0.596	0.589	0.556	0.211	0.54	0.556	0.227	0.319	0.465867	0.12931
	51	0.464	0.536	0.458	0.404	0.514	0.526	0.646	0.571	0.609	0.572	0.25	0.591	0.586	0.235	0.327	0.485933	0.129071
	54	0.458	0.536	0.469	0.382	0.545	0.547	0.66	0.615	0.639	0.588	0.254	0.582	0.599	0.24	0.346	0.497333	0.135309
	57	0.499	0.569	0.468	0.433	0.558	0.504	0.632	0.613	0.616	0.577	0.224	0.604	0.591	0.25	0.349	0.499133	0.131962
	60	0.496	0.556	0.462	0.45	0.575	0.567	0.661	0.602	0.632	0.594	0.252	0.603	0.591	0.26	0.381	0.512133	0.128102
	63	0.515	0.559	0.472	0.44	0.591	0.563	0.658	0.625	0.688	0.602	0.257	0.597	0.604	0.295	0.4	0.5244	0.127908
	66	0.533	0.596	0.475	0.461	0.584	0.586	0.683	0.628	0.651	0.611	0.289	0.636	0.616	0.287	0.413	0.5366	0.125702
	69	0.548	0.606	0.472	0.468	0.596	0.558	0.694	0.624	0.648	0.597	0.319	0.66	0.587	0.301	0.434	0.5408	0.118674
	72	0.545	0.59	0.455	0.484	0.634	0.604	0.66	0.657	0.63	0.607	0.285	0.646	0.608	0.324	0.426	0.543667	0.121547
	75	0.533	0.587	0.457	0.509	0.61	0.615	0.664	0.628	0.647	0.609	0.317	0.636	0.58	0.325	0.452	0.5446	0.111535
	78	0.534	0.603	0.459	0.539	0.647	0.656	0.705	0.66	0.669	0.613	0.341	0.616	0.628	0.33	0.46	0.564	0.117731
	81	0.553	0.594	0.46	0.553	0.631	0.633	0.676	0.666	0.663	0.618	0.362	0.619	0.633	0.336	0.502	0.5666	0.107301
	84	0.531	0.605	0.446	0.518	0.621	0.63	0.663	0.641	0.664	0.63	0.381	0.628	0.644	0.329	0.498	0.561933	0.106905
	87	0.545	0.601	0.449	0.541	0.652	0.647	0.651	0.673	0.66	0.644	0.39	0.629	0.638	0.327	0.511	0.570533	0.108067
	90	0.541	0.602	0.436	0.524	0.651	0.644	0.666	0.695	0.674	0.628	0.391	0.629	0.648	0.365	0.516	0.574	0.106671
	93	0.537	0.612	0.44	0.545	0.654	0.657	0.64	0.687	0.676	0.613	0.397	0.652	0.655	0.34	0.527	0.575467	0.108515
	96	0.522	0.611	0.456	0.547	0.655	0.64	0.657	0.691	0.696	0.64	0.402	0.632	0.641	0.353	0.522	0.577667	0.106315
	99	0.522	0.625	0.437	0.538	0.668	0.665	0.7	0.704	0.7	0.623	0.4	0.657	0.679	0.37	0.536	0.588267	0.113935
	102	0.527	0.605	0.439	0.541	0.625	0.661	0.7	0.7	0.652	0.628	0.421	0.654	0.661	0.369	0.551	0.582267	0.104305
	105	0.515	0.618	0.445	0.547	0.69	0.634	0.684	0.673	0.689	0.636	0.424	0.666	0.684	0.382	0.534	0.588067	0.106023
	108	0.525	0.583	0.456	0.578	0.689	0.677	0.685	0.681	0.698	0.616	0.44	0.67	0.669	0.388	0.541	0.593067	0.102677
	112	0.512	0.593	0.45	0.56	0.682	0.674	0.659	0.704	0.704	0.623	0.442	0.68	0.653	0.412	0.545	0.592867	0.100539
	115	0.485	0.599	0.452	0.574	0.675	0.693	0.678	0.677	0.718	0.627	0.462	0.7	0.677	0.402	0.54	0.597267	0.105021
	118	0.504	0.583	0.445	0.561	0.681	0.687	0.687	0.688	0.684	0.634	0.47	0.683	0.651	0.421	0.559	0.595867	0.0973072
	121	0.493	0.601	0.45	0.585	0.693	0.676	0.707	0.688	0.716	0.637	0.449	0.657	0.657	0.406	0.559	0.598267	0.103919
	124	0.472	0.603	0.454	0.551	0.7	0.66	0.728	0.696	0.725	0.637	0.478	0.664	0.676	0.407	0.553	0.600267	0.107077
	127	0.504	0.618	0.462	0.589	0.701	0.704	0.728	0.701	0.726	0.634	0.479	0.668	0.669	0.409	0.563	0.610333	0.104749
	130	0.492	0.611	0.456	0.569	0.694	0.719	0.749	0.686	0.708	0.634	0.471	0.679	0.665	0.414	0.564	0.6074	0.107263
	133	0.469	0.566	0.458	0.581	0.701	0.704	0.742	0.724	0.695	0.626	0.488	0.667	0.662	0.415	0.574	0.6048	0.107082
	136	0.447	0.63	0.442	0.59	0.704	0.711	0.723	0.695	0.721	0.642	0.497	0.687	0.671	0.434	0.575	0.611267	0.107758
	139	0.436	0.581	0.427	0.587	0.72	0.695	0.767	0.684	0.707	0.637	0.497	0.69	0.632	0.439	0.585	0.6056	0.111468
	142	0.436	0.565	0.436	0.618	0.699	0.702	0.748	0.699	0.712	0.631	0.511	0.682	0.639	0.434	0.581	0.6062	0.108319
	145	0.439	0.558	0.445	0.61	0.727	0.707	0.757	0.74	0.716	0.627	0.494	0.702	0.631	0.424	0.583	0.610667	0.116491
	148	0.439	0.582	0.439	0.596	0.735	0.714	0.753	0.714	0.715	0.647	0.496	0.667	0.645	0.417	0.584	0.609533	0.114939
	151	0.45	0.567	0.443	0.587	0.708	0.706	0.768	0.708	0.737	0.635	0.498	0.68	0.626	0.417	0.579	0.607267	0.113957
