# Supplementary material for: Host casein kinase 1-mediated phosphorylation modulates phase separation of a rhabdovirus phosphoprotein and virus infection
Source: eLife. 2022 Feb 22;11:e74884. doi: 10.7554/eLife.74884 (PMC8887900; doi:10.7554/eLife.74884)
Supplement: Figure 4—figure supplement 3—source data 1. [file elife-74884-fig4-figsupp3-data1.xlsx]

## Sheet: Sheet1
		Repeats
		1	2	3	Mean	SEM
	GFP	0.0364	0.0359	0.0366	0.0363	0.000360555
	GFP-PWT	0.1207	0.118	0.1184	0.119033	0.00145717
	GFP-PS5A	0.1681	0.1585	0.1646	0.163733	0.00485833
	t-test	Summary	Adjusted P Value
	GFP vs. GFP-PWT	****	<0.0001
	GFP vs. GFP-PS5A	****	<0.0001
	GFP-PWT vs. GFP-PS5A	****	<0.0001
