# Supplementary material for: Host casein kinase 1-mediated phosphorylation modulates phase separation of a rhabdovirus phosphoprotein and virus infection
Source: eLife. 2022 Feb 22;11:e74884. doi: 10.7554/eLife.74884 (PMC8887900; doi:10.7554/eLife.74884)
Supplement: Figure 5—figure supplement 1—source data 1. [file elife-74884-fig5-figsupp1-data1.xlsx]

## Sheet: Sheet4
			Repeats
			1	2	3	4	5	6	7	8	9	10	Mean	SEM
		GFP-PWT EV	3.56059	3.83114	3.64686	2.3876	6.24863	3.85111	5.32613	7.4999	5.20051	10.4759	5.20284	2.37915
		GFP-PWT NbCK1	1.29407	0	5.69846	1.16434	0	2.41787	1.18056	1.87111	6.59145	0.79667	2.10145	2.26481
		GFP-PS5A EV	14.4134	8.70466	18.2409	11.4148	9.78879	11.3375	8.6438	8.97743	10.6313	10.0938	11.2246	3.00366
		GFP-PS5A NbCK1	7.21337	13.4257	8.23994	7.84857	8.60445	11.4503	6.52196	9.77593	11.7669	9.64879	9.44959	2.20205
		GFP-PS5A EV	0.60163	0.809741	1.58354	1.41137	1.26002	0.363249	0.395681	1.16198	0.716767	1.40434	0.970832	0.447753
		GFP-PS5A NbCK1	0.340545	0.295139	0.827039	1.12331	0.828661	0.550549	1.75948	0.385952	0.481304	0.544873	0.713685	0.449505
		t-test	Summary	Adjusted P Value
		GFP-PWT EV vs. GFP-PWT NbCK1	**	0.0079
		GFP-PS5A EV vs. GFP-PS5A NbCK1	ns	0.1491
		GFP-PS5D EV vs. GFP-PS5D NbCK1	ns	0.2162

## Sheet: Sheet2
	P EV	22.3171	22.9755	16.8684	11.7829	26.0177	42.2276	21.636	38.6406	22.0901	59.2549		P CK1	4.4952	0	5.69846	3.51897	0	11.1699	1.18056	10.9202	19.1614	3.26924			5A EV	136.127	58.4149	142.847	36.4611	52.3532	32.8967	24.2468	64.5901	40.2752	44.0893		5A CK1	22.1128	40.8201	37.0286	36.007	37.9368	67.3145	17.4813	43.726	72.4454	41.8644
		18.1851	18.4349	16.4597	6.96983	23.8609	15.0067	20.6825	30.0361	14.7797	37.6189			0.612982			2.88329		5.94819		5.72116	0.340545	2.06598				59.6182	41.5465	23.5657	36.0524	27.5842	25.1777	20.5689	53.9197	39.8438	40.4114			13.8716	36.2794	25.0187	23.4976	34.2816	39.0719	15.5062	23.9063	42.0687	32.3972
		8.33201	10.9656	9.55798	6.65199	18.1624	14.8024	15.5289	25.5863	14.1894	25.9723			0.567576			0.612982		4.13195		1.33948	0.272436	1.54381				54.4419	31.1486	11.5558	28.2653	23.0663	20.41	19.0705	19.7289	31.3529	29.5821			11.7375	26.5625	24.542	15.5289	17.7084	28.901	13.6218	20.41	41.819	32.034
		7.94606	8.2639	9.37635	6.58388	16.3916	7.96876	14.144	24.769	7.83255	25.3139			0.567576			0.454061		1.20326		0.998933		1.5211				52.444	15.8694	9.26284	22.4306	20.0241	18.5938	17.2316	16.5505	23.9971	21.0003			9.62609	14.7343	14.2121	13.4629	10.0574	16.7321	12.6683	19.8425	27.902	28.4923
		6.92442	7.65092	9.14932	4.81304	15.3472	4.38169	13.8034	14.6208	7.5147	19.6608			0.22703			0.249733		0.431358		0.658388		1.4984				45.6785	15.6197	5.2217	19.0478	17.7084	15.0067	12.691	9.78501	15.9829	20.9322			8.94499	13.2813	10.4434	9.37635	6.83361	15.4835	12.0553	17.8673	23.7928	26.6761
		6.53847	5.9936	7.37849	4.60872	12.078	2.31571	10.3299	10.012	7.12875	16.9819						0.22703		0.363249		0.612982		1.22596				25.5863	13.304	3.7233	18.7981	12.0553	12.3504	8.12769	8.03687	7.96876	19.797			4.83575	6.08441	9.98933	7.80984	5.13089	13.1678	11.3742	17.8219	22.9528	18.5711
		4.31358	4.67682	5.28981	4.38169	11.1926	1.61192	8.74067	9.42176	6.03901	12.078						0.204327		0.295139		0.52217		0.862715				17.5721	12.7591	2.54274	18.3668	8.2412	6.85632	7.85525	4.42709	7.26497	4.65412			3.24653	5.63035	7.83255	5.9709	3.29194	10.5796	10.4888	12.918	17.9354	11.5104
		3.99573	3.97303	5.19899	3.38275	9.14932	1.54381	7.08335	5.51684	5.81198	10.9429								0.22703		0.499467		0.817309				13.8261	10.7612	0.908121	16.4143	4.08655	6.65199	5.83468	2.52004	6.56118	3.54167			2.88329	1.65732	5.40332	5.01737	2.76977	9.69419	9.19473	8.9677	16.3916	8.35472
		3.746	2.42922	4.88115	3.38275	5.9936	1.36218	5.51684	3.08761	5.74387	8.64986								0.204327		0.363249		0.635685				6.35685	10.1256	0.499467	8.67256	3.40545	3.47356	5.74387	1.4984	4.60872	3.51897			0.862715	1.02164	4.58601	4.65412	0.953527	4.42709	7.44659	5.67576	9.67149	6.85632
		3.60978	2.2476	4.83575	3.15572	5.40332	1.36218	5.2444	2.9968	5.2444	8.58175								0.204327		0.272436		0.544873				4.10925	9.19473	0.317842	3.40545	2.31571	2.81518	3.88222	1.45299	3.92762	3.31464			0.794606	0.817309	2.83788	3.79141	0.431358	4.06384	7.06064	5.33521	7.5147	6.62929
		2.70166	2.20219	3.746	2.20219	5.35792	1.36218	4.20006	1.86165	4.88115	6.83361										0.272436		0.476764				3.33735	6.22063	0.204327	3.11032	1.56651	1.54381	1.79354	1.11245	3.54167	3.17842			0.431358	0.794606	2.38382	2.95139	0.363249	4.06384	6.83361	4.5179	6.85632	5.58495
		2.36112	1.81624	2.74707	2.15679	4.88115	0.998933	3.85952	1.58921	4.85845	5.85738										0.272436		0.363249				2.17949	5.78927		1.45299	1.20326	1.38488	0.771903	1.11245	2.81518	2.67896					0.97623	1.77084	0.295139	2.86058	4.83575	4.42709	6.78821	5.56224
		2.17949	1.74813	1.63462	1.38488	3.70059	0.953527	3.06491	0.771903	4.4725	5.76657												0.340545				1.5211	5.06278		1.08975	0.953527	0.22703	0.681091	0.658388	1.43029	2.17949					0.794606	1.65732	0.204327	2.72436	4.76764	3.38275	6.0163	5.44873
		1.70273	1.61192	1.29407	1.27137	3.47356	0.885418	2.9741	0.658388	4.40439	5.72116												0.317842				1.4757	2.52004		0.885418	0.499467		0.681091	0.635685	0.499467	0.771903					0.771903	0.817309	0.204327	2.65625	1.99787	3.04221	4.60872	5.28981
		1.65732	1.54381	1.15785	1.13515	3.15572	0.794606	2.76977	0.454061	3.79141	5.42602												0.295139				0.885418	2.13409		0.862715	0.363249		0.476764	0.544873	0.431358	0.544873					0.544873	0.431358		2.61085	1.92976	1.15785	2.45193	5.10818
		1.4757	1.38488	1.13515	1.08975	2.67896	0.771903	2.31571	0.454061	3.7687	5.31251												0.295139				0.817309	2.11138		0.454061	0.340545			0.408655	0.363249	0.408655					0.408655	0.363249		2.2703	1.5211	0.612982	1.97516	4.88115
		1.36218	1.38488	1.11245	0.817309	2.63355	0.7492	2.29301	0.340545	3.15572	5.2671												0.272436				0.7492	1.81624		0.431358	0.22703			0.408655	0.295139	0.408655					0.272436	0.317842		0.930824	1.5211	0.52217	1.4984	3.49627
		1.18056	1.29407	0.840012	0.567576	2.58815	0.7492	2.2703	0.340545	3.13302	5.04007												0.272436				0.7492	1.56651		0.340545	0.204327			0.363249	0.204327	0.317842					0.272436			0.703794	1.40759	0.499467	1.31678	2.29301
		1.11245	1.20326	0.840012	0.567576	2.38382	0.658388	1.92976	0.317842	3.08761	4.97196												0.272436				0.590279	1.43029		0.340545				0.295139		0.317842								0.408655	0.703794	0.476764	0.635685	1.92976
		0.681091	1.18056	0.7492	0.567576	2.04327	0.612982	1.77084	0.295139	2.61085	4.74493												0.22703				0.590279	1.13515						0.272436		0.22703								0.340545	0.454061	0.408655	0.567576	1.81624
		0.658388	1.15785	0.726497	0.499467	1.99787	0.612982	1.27137	0.272436	2.54274	4.44979												0.204327				0.544873	1.04434						0.204327											0.363249		0.544873	1.4757
		0.590279	0.885418	0.658388	0.476764	1.40759	0.52217	1.22596	0.22703	2.52004	4.24547												0.204327				0.544873	0.953527																	0.249733		0.431358	1.02164
		0.590279	0.703794	0.612982	0.431358	1.38488	0.499467	1.22596	0.22703	2.52004	3.83681																0.476764	0.385952																			0.408655	0.885418
		0.567576	0.476764	0.52217	0.431358	1.06704	0.476764	1.13515		2.45193	3.746																0.408655	0.363249																			0.385952	0.7492
		0.499467	0.385952	0.499467	0.431358	0.998933	0.272436	1.06704		2.33841	3.40545																0.385952	0.272436																			0.295139	0.681091
		0.431358	0.249733	0.476764	0.431358	0.97623	0.249733	1.04434		1.95246	3.13302																0.363249	0.249733																			0.22703	0.590279
		0.431358	0.22703	0.431358	0.385952	0.840012	0.22703	0.817309		1.90705	2.92869																0.295139	0.22703																			0.204327	0.317842
		0.295139	0.204327	0.431358	0.385952	0.794606		0.703794		1.79354	2.92869																0.272436	0.204327
		0.22703		0.408655	0.363249	0.771903		0.612982		1.72543	2.90599																0.22703	0.204327
		0.204327		0.385952	0.317842	0.726497		0.52217		1.72543	2.70166																0.22703
				0.317842	0.295139	0.635685		0.454061		1.5211	2.65625																0.204327
				0.272436	0.249733	0.635685		0.431358		1.5211	2.47463
				0.272436	0.204327	0.499467		0.431358		1.4984	2.45193
				0.204327		0.408655		0.340545		1.45299	2.31571
				0.204327		0.363249		0.317842		1.45299	2.2476
						0.363249		0.272436		1.36218	2.13409
						0.340545		0.22703		1.33948	2.08868
						0.340545		0.22703		1.31678	2.06598
						0.295139		0.22703		1.31678	2.04327
						0.295139		0.22703		1.20326	2.02057
						0.272436				1.13515	2.02057
						0.22703				1.08975	1.90705
						0.204327				1.06704	1.79354
										1.06704	1.79354
										0.998933	1.74813
										0.930824	1.65732
										0.930824	1.58921
										0.908121	1.4984
										0.908121	1.36218
										0.862715	1.36218
										0.862715	1.33948
										0.840012	1.31678
										0.840012	1.22596
										0.794606	1.20326
										0.794606	1.15785
										0.771903	1.13515
										0.771903	1.11245
										0.7492	1.08975
										0.726497	1.08975
										0.681091	1.08975
										0.658388	0.998933
										0.658388	0.97623
										0.635685	0.930824
										0.635685	0.930824
										0.635685	0.885418
										0.612982	0.840012
										0.612982	0.840012
										0.612982	0.817309
										0.590279	0.794606
										0.590279	0.771903
										0.567576	0.681091
										0.567576	0.658388
										0.544873	0.612982
										0.52217	0.567576
										0.499467	0.499467
										0.476764	0.476764
										0.476764	0.408655
										0.454061	0.385952
										0.431358	0.340545
										0.431358	0.317842
										0.408655	0.295139
										0.408655	0.295139
										0.385952	0.272436
										0.385952	0.272436
										0.385952	0.204327
										0.385952	0.204327
										0.317842
										0.317842
										0.295139
										0.295139
										0.295139
										0.272436
										0.272436
										0.272436
										0.249733
										0.22703
										0.204327
										0.204327
		3.56059	3.83114	3.64686	2.3876	6.24863	3.85111	5.32613	7.4999	5.20051	10.4759			1.29407	0	5.69846	1.16434	0	2.41787	1.18056	1.87111	6.59145	0.79667				14.4134	8.70466	18.2409	11.4148	9.78879	11.3375	8.6438	8.97743	10.6313	10.0938			7.21337	13.4257	8.23994	7.84857	8.60445	11.4503	6.52196	9.77593	11.7669	9.64879
	P EV	3.56059	3.83114	3.64686	2.3876	6.24863	3.85111	5.32613	7.4999	5.20051	10.4759
	P CK1	1.29407	0	5.69846	1.16434	0	2.41787	1.18056	1.87111	6.59145	0.79667
	5A EV	14.4134	8.70466	18.2409	11.4148	9.78879	11.3375	8.6438	8.97743	10.6313	10.0938
	5A CK1	7.21337	13.4257	8.23994	7.84857	8.60445	11.4503	6.52196	9.77593	11.7669	9.64879
	5D EV	0.60163	0.809741	1.58354	1.41137	1.26002	0.363249	0.395681	1.16198	0.716767	1.40434
	5D CK1	0.340545	0.295139	0.827039	1.12331	0.828661	0.550549	1.75948	0.385952	0.481304	0.544873
	P	0.0079	**
	5A	0.1491	NS
	5D	0.2162	ns
[truncated: 23 more columns]

## Sheet: Sheet3
	P EV	22.3171	22.9755	16.8684	11.7829	26.0177	42.2276	21.636	38.6406	22.0901	59.2549		P CK1	4.4952	0	5.69846	3.51897	0.022703	11.1699	1.18056	10.9202	19.1614	3.26924			5A EV	136.127	58.4149	142.847	36.4611	52.3532	32.8967	24.2468	64.5901	40.2752	44.0893		5A CK1	22.1128	40.8201	37.0286	34.2135	28.2199	36.007	37.9368	67.3145	17.4813	43.726	72.4454
		18.1851	18.4349	16.4597	6.96983	23.8609	15.0067	20.6825	30.0361	14.7797	37.6189			0.612982		0.908121	2.88329		5.94819	0.181624	5.72116	0.340545	2.06598				59.6182	41.5465	23.5657	36.0524	27.5842	25.1777	20.5689	53.9197	39.8438	40.4114			13.8716	36.2794	25.0187	28.6966	22.9982	23.4976	34.2816	39.0719	15.5062	23.9063	42.0687
		8.33201	10.9656	9.55798	6.65199	18.1624	14.8024	15.5289	25.5863	14.1894	25.9723			0.567576		0.0681091	0.612982		4.13195		1.33948	0.272436	1.54381				54.4419	31.1486	11.5558	28.2653	23.0663	20.41	19.0705	19.7289	31.3529	29.5821			11.7375	26.5625	24.542	28.5377	11.9645	15.5289	17.7084	28.901	13.6218	20.41	41.819
		7.94606	8.2639	9.37635	6.58388	16.3916	7.96876	14.144	24.769	7.83255	25.3139			0.567576		0.022703	0.454061		1.20326		0.998933	0.158921	1.5211				52.444	15.8694	9.26284	22.4306	20.0241	18.5938	17.2316	16.5505	23.9971	21.0003			9.62609	14.7343	14.2121	14.5072	11.9418	13.4629	10.0574	16.7321	12.6683	19.8425	27.902
		6.92442	7.65092	9.14932	4.81304	15.3472	4.38169	13.8034	14.6208	7.5147	19.6608			0.22703			0.249733		0.431358		0.658388	0.0681091	1.4984				45.6785	15.6197	5.2217	19.0478	17.7084	15.0067	12.691	9.78501	15.9829	20.9322			8.94499	13.2813	10.4434	9.92123	5.92549	9.37635	6.83361	15.4835	12.0553	17.8673	23.7928
		6.53847	5.9936	7.37849	4.60872	12.078	2.31571	10.3299	10.012	7.12875	16.9819			0.0908121			0.22703		0.363249		0.612982	0.0454061	1.22596				25.5863	13.304	3.7233	18.7981	12.0553	12.3504	8.12769	8.03687	7.96876	19.797			4.83575	6.08441	9.98933	8.28661	4.85845	7.80984	5.13089	13.1678	11.3742	17.8219	22.9528
		4.31358	4.67682	5.28981	4.38169	11.1926	1.61192	8.74067	9.42176	6.03901	12.078			0.0681091			0.204327		0.295139		0.52217	0.022703	0.862715				17.5721	12.7591	2.54274	18.3668	8.2412	6.85632	7.85525	4.42709	7.26497	4.65412			3.24653	5.63035	7.83255	6.60658	4.35898	5.9709	3.29194	10.5796	10.4888	12.918	17.9354
		3.99573	3.97303	5.19899	3.38275	9.14932	1.54381	7.08335	5.51684	5.81198	10.9429			0.0681091			0.181624		0.22703		0.499467	0.022703	0.817309				13.8261	10.7612	0.908121	16.4143	4.08655	6.65199	5.83468	2.52004	6.56118	3.54167			2.88329	1.65732	5.40332	5.53954	3.85952	5.01737	2.76977	9.69419	9.19473	8.9677	16.3916
		3.746	2.42922	4.88115	3.38275	5.9936	1.36218	5.51684	3.08761	5.74387	8.64986			0.0454061			0.0681091		0.204327		0.363249		0.635685				6.35685	10.1256	0.499467	8.67256	3.40545	3.47356	5.74387	1.4984	4.60872	3.51897			0.862715	1.02164	4.58601	3.81411	3.40545	4.65412	0.953527	4.42709	7.44659	5.67576	9.67149
		3.60978	2.2476	4.83575	3.15572	5.40332	1.36218	5.2444	2.9968	5.2444	8.58175			0.0454061			0.022703		0.204327		0.272436		0.544873				4.10925	9.19473	0.317842	3.40545	2.31571	2.81518	3.88222	1.45299	3.92762	3.31464			0.794606	0.817309	2.83788	3.7687	3.06491	3.79141	0.431358	4.06384	7.06064	5.33521	7.5147
		2.70166	2.20219	3.746	2.20219	5.35792	1.36218	4.20006	1.86165	4.88115	6.83361			0.0454061			0.022703		0.158921		0.272436		0.476764				3.33735	6.22063	0.204327	3.11032	1.56651	1.54381	1.79354	1.11245	3.54167	3.17842			0.431358	0.794606	2.38382	3.58708	1.99787	2.95139	0.363249	4.06384	6.83361	4.5179	6.85632
		2.36112	1.81624	2.74707	2.15679	4.88115	0.998933	3.85952	1.58921	4.85845	5.85738			0.0454061			0.022703		0.158921		0.272436		0.363249				2.17949	5.78927	0.181624	1.45299	1.20326	1.38488	0.771903	1.11245	2.81518	2.67896			0.181624	0.181624	0.97623	2.9741	1.4757	1.77084	0.295139	2.86058	4.83575	4.42709	6.78821
		2.17949	1.74813	1.63462	1.38488	3.70059	0.953527	3.06491	0.771903	4.4725	5.76657			0.022703					0.136218		0.158921		0.340545				1.5211	5.06278	0.136218	1.08975	0.953527	0.22703	0.681091	0.658388	1.43029	2.17949			0.0454061	0.136218	0.794606	2.17949	1.18056	1.65732	0.204327	2.72436	4.76764	3.38275	6.0163
		1.70273	1.61192	1.29407	1.27137	3.47356	0.885418	2.9741	0.658388	4.40439	5.72116												0.317842				1.4757	2.52004	0.0908121	0.885418	0.499467	0.181624	0.681091	0.635685	0.499467	0.771903			0.022703	0.113515	0.771903	1.81624	1.11245	0.817309	0.204327	2.65625	1.99787	3.04221	4.60872
		1.65732	1.54381	1.15785	1.13515	3.15572	0.794606	2.76977	0.454061	3.79141	5.42602												0.295139				0.885418	2.13409	0.0681091	0.862715	0.363249	0.022703	0.476764	0.544873	0.431358	0.544873			0.022703	0.0908121	0.544873	1.72543	0.908121	0.431358	0.158921	2.61085	1.92976	1.15785	2.45193
		1.4757	1.38488	1.13515	1.08975	2.67896	0.771903	2.31571	0.454061	3.7687	5.31251												0.295139				0.817309	2.11138	0.0681091	0.454061	0.340545	0.022703	0.181624	0.408655	0.363249	0.408655			0.022703	0.0454061	0.408655	1.54381	0.726497	0.363249	0.136218	2.2703	1.5211	0.612982	1.97516
		1.36218	1.38488	1.11245	0.817309	2.63355	0.7492	2.29301	0.340545	3.15572	5.2671												0.272436				0.7492	1.81624	0.0681091	0.431358	0.22703	0.022703	0.113515	0.408655	0.295139	0.408655			0.022703	0.0454061	0.272436	1.27137	0.317842	0.317842	0.113515	0.930824	1.5211	0.52217	1.4984
		1.18056	1.29407	0.840012	0.567576	2.58815	0.7492	2.2703	0.340545	3.13302	5.04007												0.272436				0.7492	1.56651	0.0454061	0.340545	0.204327	0.022703	0.0454061	0.363249	0.204327	0.317842			0.022703	0.0454061	0.272436	1.20326	0.272436	0.158921	0.113515	0.703794	1.40759	0.499467	1.31678
		1.11245	1.20326	0.840012	0.567576	2.38382	0.658388	1.92976	0.317842	3.08761	4.97196												0.272436				0.590279	1.43029	0.0454061	0.340545	0.113515	0.022703	0.022703	0.295139	0.136218	0.317842			0.022703	0.0454061	0.181624	1.02164	0.158921	0.158921	0.0908121	0.408655	0.703794	0.476764	0.635685
		0.681091	1.18056	0.7492	0.567576	2.04327	0.612982	1.77084	0.295139	2.61085	4.74493												0.22703				0.590279	1.13515	0.022703	0.113515	0.0908121		0.022703	0.272436	0.113515	0.22703			0.022703	0.022703	0.136218	0.930824	0.158921	0.113515	0.0681091	0.340545	0.454061	0.408655	0.567576
		0.658388	1.15785	0.726497	0.499467	1.99787	0.612982	1.27137	0.272436	2.54274	4.44979												0.204327				0.544873	1.04434		0.022703	0.0454061		0.022703	0.204327	0.0908121	0.0681091			0.022703	0.022703	0.113515	0.862715	0.113515	0.0908121	0.0681091	0.158921	0.363249	0.181624	0.544873
		0.590279	0.885418	0.658388	0.476764	1.40759	0.52217	1.22596	0.22703	2.52004	4.24547												0.204327				0.544873	0.953527			0.0454061		0.022703	0.158921	0.0908121	0.0454061			0.022703	0.022703	0.113515	0.794606	0.0454061	0.0454061	0.0681091	0.0681091	0.249733	0.158921	0.431358
		0.590279	0.703794	0.612982	0.431358	1.38488	0.499467	1.22596	0.22703	2.52004	3.83681												0.158921				0.476764	0.385952			0.0454061			0.136218	0.0681091	0.0454061			0.022703	0.022703	0.0908121	0.771903	0.0454061	0.0454061	0.022703	0.0681091	0.158921	0.113515	0.408655
		0.567576	0.476764	0.52217	0.431358	1.06704	0.476764	1.13515	0.181624	2.45193	3.746												0.158921				0.408655	0.363249			0.022703			0.113515	0.0681091	0.0454061			0.022703	0.022703	0.0908121	0.658388	0.0454061	0.022703	0.022703	0.0454061	0.136218	0.0681091	0.385952
		0.499467	0.385952	0.499467	0.431358	0.998933	0.272436	1.06704	0.181624	2.33841	3.40545												0.158921				0.385952	0.272436			0.022703			0.0454061	0.0681091	0.022703				0.022703	0.0908121	0.635685	0.022703	0.022703	0.022703	0.0454061	0.0454061	0.0454061	0.295139
		0.431358	0.249733	0.476764	0.431358	0.97623	0.249733	1.04434	0.158921	1.95246	3.13302												0.136218				0.363249	0.249733			0.022703			0.0454061	0.0454061	0.022703				0.022703	0.0681091	0.612982	0.022703	0.022703	0.022703	0.0454061	0.0454061	0.022703	0.22703
		0.431358	0.22703	0.431358	0.385952	0.840012	0.22703	0.817309	0.0908121	1.90705	2.92869												0.136218				0.295139	0.22703			0.022703			0.0454061	0.0454061	0.022703				0.022703	0.0681091	0.612982	0.022703	0.022703	0.022703	0.0454061	0.022703	0.022703	0.204327
		0.295139	0.204327	0.431358	0.385952	0.794606	0.158921	0.703794	0.0908121	1.79354	2.92869												0.136218				0.272436	0.204327			0.022703			0.0454061	0.0454061	0.022703				0.022703	0.0454061	0.499467	0.022703	0.022703	0.022703	0.022703	0.022703	0.022703	0.204327
		0.22703	0.136218	0.408655	0.363249	0.771903	0.158921	0.612982	0.0681091	1.72543	2.90599												0.113515				0.22703	0.204327			0.022703			0.0454061	0.0454061	0.022703				0.022703	0.0454061	0.476764	0.022703	0.022703	0.022703	0.022703	0.022703	0.022703	0.158921
		0.204327	0.113515	0.385952	0.317842	0.726497	0.136218	0.52217	0.0454061	1.72543	2.70166												0.0908121				0.22703	0.181624			0.022703			0.0454061	0.0454061	0.022703				0.022703	0.0454061	0.363249	0.022703	0.022703	0.022703	0.022703	0.022703	0.022703	0.136218
		0.158921	0.113515	0.317842	0.295139	0.635685	0.136218	0.454061	0.0454061	1.5211	2.65625												0.0908121				0.204327	0.158921			0.022703			0.022703	0.022703	0.022703				0.022703	0.022703	0.340545	0.022703	0.022703		0.022703	0.022703	0.022703	0.136218
		0.113515	0.113515	0.272436	0.249733	0.635685	0.0908121	0.431358	0.0454061	1.5211	2.47463												0.0908121				0.158921	0.136218			0.022703			0.022703	0.022703	0.022703				0.022703	0.022703	0.317842	0.022703	0.022703		0.022703	0.022703	0.022703	0.113515
		0.0908121	0.0454061	0.272436	0.204327	0.499467	0.0681091	0.431358	0.022703	1.4984	2.45193												0.0908121				0.158921	0.136218			0.022703			0.022703	0.022703	0.022703				0.022703	0.022703	0.272436	0.022703	0.022703		0.022703	0.022703	0.022703	0.113515
		0.0908121	0.022703	0.204327	0.136218	0.408655	0.0681091	0.340545	0.022703	1.45299	2.31571												0.0681091				0.113515	0.113515			0.022703			0.022703	0.022703	0.022703				0.022703	0.022703	0.249733	0.022703	0.022703		0.022703	0.022703	0.022703	0.0908121
		0.0908121	0.022703	0.204327	0.136218	0.363249	0.0454061	0.317842	0.022703	1.45299	2.2476												0.022703				0.113515	0.0908121			0.022703			0.022703	0.022703	0.022703				0.022703	0.022703	0.22703	0.022703	0.022703		0.022703	0.022703	0.022703	0.0908121
		0.0681091	0.022703	0.181624	0.0681091	0.363249	0.0454061	0.272436	0.022703	1.36218	2.13409																0.113515	0.0681091			0.022703			0.022703	0.022703	0.022703				0.022703	0.022703	0.22703	0.022703	0.022703		0.022703	0.022703	0.022703	0.0908121
		0.0681091	0.022703	0.158921	0.0454061	0.340545	0.022703	0.22703	0.022703	1.33948	2.08868																0.113515	0.0681091			0.022703			0.022703	0.022703					0.022703	0.022703	0.181624	0.022703	0.022703		0.022703	0.022703	0.022703	0.0908121
		0.0454061	0.022703	0.158921	0.0454061	0.340545	0.022703	0.22703	0.022703	1.31678	2.06598																0.113515	0.0681091			0.022703			0.022703	0.022703					0.022703	0.022703	0.181624	0.022703	0.022703		0.022703	0.022703	0.022703	0.0681091
		0.0454061	0.022703	0.158921	0.0454061	0.295139	0.022703	0.22703	0.022703	1.31678	2.04327																0.0908121	0.0454061			0.022703			0.022703	0.022703					0.022703	0.022703	0.158921	0.022703	0.022703		0.022703	0.022703	0.022703	0.0681091
		0.0454061	0.022703	0.113515	0.0454061	0.295139	0.022703	0.22703	0.022703	1.20326	2.02057																0.0908121	0.0454061			0.022703			0.022703	0.022703					0.022703	0.022703	0.158921	0.022703	0.022703		0.022703	0.022703	0.022703	0.0681091
		0.022703	0.022703	0.113515	0.022703	0.272436	0.022703	0.113515	0.022703	1.13515	2.02057																0.0908121	0.0454061			0.022703			0.022703	0.022703					0.022703	0.022703	0.113515	0.022703			0.022703	0.022703	0.022703	0.0454061
		0.022703	0.022703	0.0908121	0.022703	0.22703	0.022703	0.0908121		1.08975	1.90705																0.0681091	0.0454061			0.022703			0.022703	0.022703						0.022703	0.0908121				0.022703	0.022703	0.022703	0.0454061
		0.022703		0.0454061	0.022703	0.204327	0.022703	0.0908121		1.06704	1.79354																0.0681091	0.0454061			0.022703			0.022703	0.022703						0.022703	0.0908121				0.022703			0.0454061
		0.022703		0.0454061	0.022703	0.136218	0.022703	0.0681091		1.06704	1.79354																0.0681091	0.0454061						0.022703	0.022703						0.022703	0.0454061				0.022703			0.0454061
		0.022703		0.022703	0.022703	0.136218	0.022703	0.0681091		0.998933	1.74813																0.0454061	0.0454061						0.022703	0.022703						0.022703	0.0454061				0.022703			0.0454061
		0.022703		0.022703	0.022703	0.136218	0.022703	0.0454061		0.930824	1.65732																0.0454061	0.0454061						0.022703	0.022703						0.022703	0.022703				0.022703			0.0454061
		0.022703		0.022703	0.022703	0.113515	0.022703	0.0454061		0.930824	1.58921																0.0454061	0.0454061						0.022703	0.022703						0.022703	0.022703				0.022703			0.0454061
		0.022703		0.022703	0.022703	0.0908121	0.022703	0.0454061		0.908121	1.4984																0.0454061	0.0454061						0.022703	0.022703						0.022703	0.022703				0.022703			0.0454061
				0.022703	0.022703	0.0908121	0.022703	0.022703		0.908121	1.36218																0.0454061	0.0454061						0.022703	0.022703						0.022703	0.022703				0.022703			0.0454061
				0.022703	0.022703	0.0908121	0.022703	0.022703		0.862715	1.36218																0.0454061	0.022703						0.022703	0.022703							0.022703				0.022703			0.0454061
				0.022703		0.0454061	0.022703	0.022703		0.862715	1.33948																0.0454061	0.022703						0.022703	0.022703							0.022703							0.0454061
				0.022703		0.0454061	0.022703	0.022703		0.840012	1.31678																0.0454061	0.022703						0.022703	0.022703							0.022703							0.0454061
						0.0454061	0.022703	0.022703		0.840012	1.22596																0.0454061	0.022703						0.022703	0.022703							0.022703							0.0454061
						0.0454061		0.022703		0.794606	1.20326																0.0454061	0.022703						0.022703	0.022703							0.022703							0.0454061
						0.022703		0.022703		0.794606	1.15785																0.0454061	0.022703						0.022703	0.022703							0.022703
						0.022703		0.022703		0.771903	1.13515																0.0454061	0.022703						0.022703	0.022703							0.022703							0.0454061
						0.022703		0.022703		0.771903	1.11245																0.0454061	0.022703						0.022703	0.022703														0.0454061
						0.022703		0.022703		0.7492	1.08975																0.0454061	0.022703							0.022703														0.0454061
						0.022703		0.022703		0.726497	1.08975																0.0454061	0.022703							0.022703														0.0454061
						0.022703		0.022703		0.681091	1.08975																0.0454061	0.022703																					0.0454061
										0.658388	0.998933																0.0454061	0.022703																					0.0454061
										0.658388	0.97623																0.0454061	0.022703																					0.022703
										0.635685	0.930824																0.0454061	0.022703																					0.022703
										0.635685	0.930824																0.0454061	0.022703																					0.022703
										0.635685	0.885418																0.0454061	0.022703																					0.022703
										0.612982	0.840012																0.0454061	0.022703																					0.022703
										0.612982	0.840012																0.022703	0.022703																					0.022703
										0.612982	0.817309																0.022703	0.022703																					0.022703
										0.590279	0.794606																0.022703	0.022703																					0.022703
										0.590279	0.771903																0.022703	0.022703																					0.022703
										0.567576	0.681091																0.022703	0.022703																					0.022703
										0.567576	0.658388																0.022703	0.022703																					0.022703
										0.544873	0.612982																0.022703	0.022703																					0.022703
										0.52217	0.567576																0.022703	0.022703																					0.022703
										0.499467	0.499467																0.022703	0.022703																					0.022703
										0.476764	0.476764																0.022703	0.022703																					0.022703
										0.476764	0.408655																0.022703	0.022703																					0.022703
										0.454061	0.385952																0.022703	0.022703																					0.022703
										0.431358	0.340545																0.022703	0.022703																					0.022703
										0.431358	0.317842																0.022703	0.022703																					0.022703
										0.408655	0.295139																0.022703	0.022703																					0.022703
										0.408655	0.295139																0.022703	0.022703																					0.022703
										0.385952	0.272436																0.022703	0.022703																					0.022703
										0.385952	0.272436																0.022703	0.022703
										0.385952	0.204327																0.022703	0.022703
										0.385952	0.204327																0.022703	0.022703
										0.317842	0.181624																0.022703	0.022703
										0.317842	0.181624																0.022703	0.022703
										0.295139	0.158921																0.022703	0.022703
										0.295139	0.136218																0.022703	0.022703
										0.295139	0.0908121																0.022703	0.022703
										0.272436	0.0908121																0.022703	0.022703
										0.272436	0.0908121																0.022703	0.022703
										0.272436	0.0681091																0.022703	0.022703
										0.249733	0.0681091																0.022703	0.022703
										0.22703	0.0681091																0.022703	0.022703
										0.204327	0.0681091																0.022703	0.022703
										0.204327	0.0681091																0.022703	0.022703
										0.181624	0.0681091																0.022703	0.022703
										0.158921	0.0681091																0.022703	0.022703
										0.158921	0.0681091																0.022703	0.022703
										0.136218	0.0681091																0.022703	0.022703
										0.136218	0.0454061																0.022703	0.022703
										0.136218	0.0454061																0.022703	0.022703
										0.113515	0.0454061																0.022703	0.022703
										0.113515	0.0454061																0.022703	0.022703
										0.113515	0.0454061																0.022703	0.022703
										0.113515	0.0454061																0.022703	0.022703
										0.0908121	0.0454061																0.022703	0.022703
										0.0681091	0.0454061																0.022703	0.022703
										0.0681091	0.0454061																0.022703	0.022703
										0.0681091	0.0454061																0.022703	0.022703
										0.0681091	0.0454061																0.022703	0.022703
										0.0681091	0.0454061																0.022703	0.022703
										0.0681091	0.0454061																0.022703	0.022703
										0.0454061	0.0454061																0.022703	0.022703
										0.0454061	0.0454061																0.022703	0.022703
										0.0454061	0.022703																0.022703	0.022703
										0.0454061	0.022703																0.022703	0.022703
										0.0454061	0.022703																0.022703	0.022703
										0.0454061	0.022703																0.022703	0.022703
										0.0454061	0.022703																0.022703	0.022703
										0.0454061	0.022703																0.022703	0.022703
										0.0454061	0.022703																0.022703	0.022703
										0.0454061	0.022703																0.022703	0.022703
										0.0454061	0.022703																0.022703	0.022703
										0.0454061	0.022703																0.022703	0.022703
										0.0454061	0.022703																0.022703	0.022703
										0.0454061	0.022703																0.022703	0.022703
										0.0454061	0.022703																0.022703	0
										0.0454061	0.022703																0.022703
										0.0454061	0.022703																0.022703
										0.0454061	0.022703																0.022703
										0.0454061	0.022703																0.022703
										0.0454061	0.022703																0.022703
										0.0454061	0.022703																0.022703
										0.0454061	0.022703																0.022703
										0.0454061	0.022703																0.022703
										0.0454061	0.022703																0.022703
										0.0454061	0.022703																0.022703
										0.022703	0.022703																0.022703
										0.022703	0.022703																0.022703
										0.022703	0.022703																0.022703
										0.022703	0.022703																0.022703
										0.022703	0.022703																0.022703
										0.022703	0.022703																0.022703
										0.022703	0.022703																0.022703
										0.022703	0.022703																0.022703
										0.022703	0.022703																0.022703
										0.022703	0.022703																0.022703
										0.022703	0.022703																0.022703
										0.022703	0.022703																0.022703
										0.022703	0.022703																0.022703
										0.022703	0.022703																0.022703
										0.022703	0.022703																0.022703
										0.022703	0.022703																0.022703
										0.022703	0.022703																0.022703
										0.022703	0.022703																0.022703
										0.022703	0.022703																0.022703
										0.022703	0.022703																0.022703
										0.022703	0.022703																0.022703
										0.022703	0.022703																0.022703
										0.022703	0.022703																0.022703
										0.022703	0.022703																0.022703
										0.022703	0.022703																0.022703
										0.022703	0.022703																0.022703
										0.022703	0.022703																0.022703
										0.022703	0.022703																0.022703
										0.022703	0.022703																0.022703
										0.022703	0.022703																0.022703
										0.022703	0.022703																0.022703
										0.022703	0.022703																0.022703
										0.022703	0.022703																0.022703
										0.022703	0.022703																0.022703
										0.022703	0.022703																0.022703
										0.022703	0.022703																0.022703
										0.022703	0.022703																0.022703
										0.022703	0.022703																0.022703
										0.022703	0.022703																0.022703
										0.022703	0.022703																0.022703
										0.022703	0.022703																0.022703
										0.022703	0.022703																0.022703
										0.022703	0.022703																0.022703
										0.022703	0.022703																0.022703
										0.022703	0.022703																0.022703
										0.022703	0.022703																0.022703
										0.022703	0.022703																0.022703
										0.022703	0.022703																0.022703
										0.022703	0.022703																0.022703
										0.022703	0.022703																0.022703
										0.022703	0.022703																0.022703
										0.022703	0.022703																0.022703
										0.022703	0.022703																0.022703
										0.022703	0.022703																0.022703
										0.022703	0.022703																0.022703
										0.022703	0.022703																0.022703
										0.022703	0.022703																0.022703
										0.022703	0.022703																0.022703
										0.022703	0.022703																0.022703
										0.022703	0.022703																0
										0.022703	0.022703																0
										0.022703	0.022703																0
										0.022703	0.022703
										0.022703	0.022703
										0.022703	0.022703
										0.022703	0.022703
										0.022703	0.022703
										0.022703	0.022703
										0.022703	0.022703
										0.022703	0.022703
										0.022703	0.022703
										0.022703	0.022703
										0.022703	0.022703
										0.022703	0.022703
										0.022703	0.022703
										0.022703	0.022703
										0.022703	0.022703
										0.022703	0.022703
										0.022703	0.022703
										0.022703	0.022703
										0.022703	0.022703
										0.022703	0.022703
										0.022703	0.022703
										0.022703	0.022703
										0.022703	0.022703
										0.022703	0.022703
										0.022703	0.022703
										0.022703	0.022703
										0.022703	0.022703
										0.022703	0.022703
										0.022703	0.022703
										0.022703	0.022703
										0.022703	0.022703
										0.022703	0.022703
										0.022703	0.022703
										0.022703	0.022703
										0.022703	0.022703
										0.022703	0.022703
										0.022703	0.022703
										0.022703	0.022703
										0.022703	0.022703
										0.022703	0.022703
										0.022703	0.022703
										0.022703	0.022703
											0.022703
											0.022703
											0.022703
											0.022703
											0.022703
											0.022703
											0.022703
											0.022703
											0.022703
											0.022703
											0.022703
											0.022703
											0.022703
											0.022703
											0.022703
											0.022703
											0.022703
											0.022703
											0.022703
[truncated: 24 more columns]

## Sheet: Sheet1
P EV	983	1012	743	519	1146	1860	953	1702	973	2610		P CK1	198	0	251	155	1	492	52	481	844	144			5A EV	5996	2573	6292	1606	2306	1449	1068	2845	1774	1942		5A CK1	974	1798	1631	1507	1243	1586	1671	2965	770	1926	3191	1844
	801	812	725	307	1051	661	911	1323	651	1657			27		40	127		262	8	252	15	91				2626	1830	1038	1588	1215	1109	906	2375	1755	1780			611	1598	1102	1264	1013	1035	1510	1721	683	1053	1853	1427
	367	483	421	293	800	652	684	1127	625	1144			25		3	27		182		59	12	68				2398	1372	509	1245	1016	899	840	869	1381	1303			517	1170	1081	1257	527	684	780	1273	600	899	1842	1411
	350	364	413	290	722	351	623	1091	345	1115			25		1	20		53		44	7	67				2310	699	408	988	882	819	759	729	1057	925			424	649	626	639	526	593	443	737	558	874	1229	1255
	305	337	403	212	676	193	608	644	331	866			10			11		19		29	3	66				2012	688	230	839	780	661	559	431	704	922			394	585	460	437	261	413	301	682	531	787	1048	1175
	288	264	325	203	532	102	455	441	314	748			4			10		16		27	2	54				1127	586	164	828	531	544	358	354	351	872			213	268	440	365	214	344	226	580	501	785	1011	818
	190	206	233	193	493	71	385	415	266	532			3			9		13		23	1	38				774	562	112	809	363	302	346	195	320	205			143	248	345	291	192	263	145	466	462	569	790	507
	176	175	229	149	403	68	312	243	256	482			3			8		10		22	1	36				609	474	40	723	180	293	257	111	289	156			127	73	238	244	170	221	122	427	405	395	722	368
	165	107	215	149	264	60	243	136	253	381			2			3		9		16		28				280	446	22	382	150	153	253	66	203	155			38	45	202	168	150	205	42	195	328	250	426	302
	159	99	213	139	238	60	231	132	231	378			2			1		9		12		24				181	405	14	150	102	124	171	64	173	146			35	36	125	166	135	167	19	179	311	235	331	292
	119	97	165	97	236	60	185	82	215	301			2			1		7		12		21				147	274	9	137	69	68	79	49	156	140			19	35	105	158	88	130	16	179	301	199	302	246
	104	80	121	95	215	44	170	70	214	258			2			1		7		12		16				96	255	8	64	53	61	34	49	124	118			8	8	43	131	65	78	13	126	213	195	299	245
	96	77	72	61	163	42	135	34	197	254			1					6		7		15				67	223	6	48	42	10	30	29	63	96			2	6	35	96	52	73	9	120	210	149	265	240
	75	71	57	56	153	39	131	29	194	252								6		6		14				65	111	4	39	22	8	30	28	22	34			1	5	34	80	49	36	9	117	88	134	203	233
	73	68	51	50	139	35	122	20	167	239								6		4		13				39	94	3	38	16	1	21	24	19	24			1	4	24	76	40	19	7	115	85	51	108	225
	65	61	50	48	118	34	102	20	166	234								6		3		13				36	93	3	20	15	1	8	18	16	18			1	2	18	68	32	16	6	100	67	27	87	215
	60	61	49	36	116	33	101	15	139	232								4		2		12				33	80	3	19	10	1	5	18	13	18			1	2	12	56	14	14	5	41	67	23	66	154
	52	57	37	25	114	33	100	15	138	222								4		1		12				33	69	2	15	9	1	2	16	9	14			1	2	12	53	12	7	5	31	62	22	58	101
	49	53	37	25	105	29	85	14	136	219								3		1		12				26	63	2	15	5	1	1	13	6	14			1	2	8	45	7	7	4	18	31	21	28	85
	30	52	33	25	90	27	78	13	115	209								2		1		10				26	50	1	5	4		1	12	5	10			1	1	6	41	7	5	3	15	20	18	25	80
	29	51	32	22	88	27	56	12	112	196								1				9				24	46		1	2		1	9	4	3			1	1	5	38	5	4	3	7	16	8	24	65
	26	39	29	21	62	23	54	10	111	187								1				9				24	42			2		1	7	4	2			1	1	5	35	2	2	3	3	11	7	19	45
	26	31	27	19	61	22	54	10	111	169												7				21	17			2			6	3	2			1	1	4	34	2	2	1	3	7	5	18	39
	25	21	23	19	47	21	50	8	108	165												7				18	16			1			5	3	2			1	1	4	29	2	1	1	2	6	3	17	33
	22	17	22	19	44	12	47	8	103	150												7				17	12			1			2	3	1				1	4	28	1	1	1	2	2	2	13	30
	19	11	21	19	43	11	46	7	86	138												6				16	11			1			2	2	1				1	3	27	1	1	1	2	2	1	10	26
	19	10	19	17	37	10	36	4	84	129												6				13	10			1			2	2	1				1	3	27	1	1	1	2	1	1	9	14
	13	9	19	17	35	7	31	4	79	129												6				12	9			1			2	2	1				1	2	22	1	1	1	1	1	1	9	9
	10	6	18	16	34	7	27	3	76	128												5				10	9			1			2	2	1				1	2	21	1	1	1	1	1	1	7	6
	9	5	17	14	32	6	23	2	76	119												4				10	8			1			2	2	1				1	2	16	1	1	1	1	1	1	6	5
	7	5	14	13	28	6	20	2	67	117												4				9	7			1			1	1	1				1	1	15	1	1		1	1	1	6	5
	5	5	12	11	28	4	19	2	67	109												4				7	6			1			1	1	1				1	1	14	1	1		1	1	1	5	5
	4	2	12	9	22	3	19	1	66	108												4				7	6			1			1	1	1				1	1	12	1	1		1	1	1	5	4
	4	1	9	6	18	3	15	1	64	102												3				5	5			1			1	1	1				1	1	11	1	1		1	1	1	4	4
	4	1	9	6	16	2	14	1	64	99												1				5	4			1			1	1	1				1	1	10	1	1		1	1	1	4	4
	3	1	8	3	16	2	12	1	60	94																5	3			1			1	1	1				1	1	10	1	1		1	1	1	4	4
	3	1	7	2	15	1	10	1	59	92																5	3			1			1	1					1	1	8	1	1		1	1	1	4	4
	2	1	7	2	15	1	10	1	58	91																5	3			1			1	1					1	1	8	1	1		1	1	1	3	4
	2	1	7	2	13	1	10	1	58	90																4	2			1			1	1					1	1	7	1	1		1	1	1	3	4
	2	1	5	2	13	1	10	1	53	89																4	2			1			1	1					1	1	7	1	1		1	1	1	3	4
	1	1	5	1	12	1	5	1	50	89																4	2			1			1	1					1	1	5	1			1	1	1	2	3
	1	1	4	1	10	1	4		48	84																3	2			1			1	1						1	4				1	1	1	2	3
	1		2	1	9	1	4		47	79																3	2			1			1	1						1	4				1			2	3
	1		2	1	6	1	3		47	79																3	2						1	1						1	2				1			2	3
	1		1	1	6	1	3		44	77																2	2						1	1						1	2				1			2	3
	1		1	1	6	1	2		41	73																2	2						1	1						1	1				1			2	3
	1		1	1	5	1	2		41	70																2	2						1	1						1	1				1			2	3
	1		1	1	4	1	2		40	66																2	2						1	1						1	1				1			2	3
			1	1	4	1	1		40	60																2	2						1	1						1	1				1			2	3
			1	1	4	1	1		38	60																2	1						1	1							1				1			2	3
			1		2	1	1		38	59																2	1						1	1							1							2	3
			1		2	1	1		37	58																2	1						1	1							1							2	2
					2	1	1		37	54																2	1						1	1							1							2	2
					2		1		35	53																2	1						1	1							1							2	2
					1		1		35	51																2	1						1	1							1							2	2
					1		1		34	50																2	1						1	1							1							2	2
					1		1		34	49																2	1						1	1														2	2
					1		1		33	48																2	1							1														2	2
					1		1		32	48																2	1							1														2	2
					1		1		30	48																2	1																					2	2
									29	44																2	1																					2	2
									29	43																2	1																					1	2
									28	41																2	1																					1	2
									28	41																2	1																					1	2
									28	39																2	1																					1	2
									27	37																2	1																					1	2
									27	37																1	1																					1	2
									27	36																1	1																					1	2
									26	35																1	1																					1	2
									26	34																1	1																					1	2
									25	30																1	1																					1	2
									25	29																1	1																					1	2
									24	27																1	1																					1	2
									23	25																1	1																					1	2
									22	22																1	1																					1	2
									21	21																1	1																					1	2
									21	18																1	1																					1	2
									20	17																1	1																					1	2
									19	15																1	1																					1	2
									19	14																1	1																					1	2
									18	13																1	1																					1	2
									18	13																1	1																					1	2
									17	12																1	1																					1	2
									17	12																1	1																					1	1
									17	9																1	1																					1	1
									17	9																1	1																					1	1
									14	8																1	1																					1	1
									14	8																1	1																					1	1
									13	7																1	1																					1	1
									13	6																1	1																					1	1
									13	4																1	1																					1	1
									12	4																1	1																					1	1
									12	4																1	1																					1	1
									12	3																1	1																					1	1
									11	3																1	1																					1	1
									10	3																1	1																					1	1
									9	3																1	1																					1	1
									9	3																1	1																					1	1
									8	3																1	1																					1	1
									7	3																1	1																					1	1
									7	3																1	1																					1	1
									6	3																1	1																					1	1
									6	2																1	1																					1	1
									6	2																1	1																					1	1
									5	2																1	1																					1	1
									5	2																1	1																					1	1
									5	2																1	1																					1	1
									5	2																1	1																					1	1
									4	2																1	1																					1	1
									3	2																1	1																					1	1
									3	2																1	1																					1	1
									3	2																1	1																					1	1
									3	2																1	1																					1	1
									3	2																1	1																					1	1
									3	2																1	1																					1	1
									2	2																1	1																					1	1
									2	2																1	1																					1	1
									2	1																1	1																					1	1
									2	1																1	1																					1	1
									2	1																1	1																					1	1
									2	1																1	1																					1	1
									2	1																1	1																					1	1
									2	1																1	1																					1	1
									2	1																1	1																					1	1
									2	1																1	1																					1	1
									2	1																1	1																					1	1
									2	1																1	1																					1	1
									2	1																1	1																					1	1
									2	1																1	1																					1	1
									2	1																1																						1	1
									2	1																1																						1	1
									2	1																1																						1	1
									2	1																1																						1	1
									2	1																1																						1	1
									2	1																1																						1	1
									2	1																1																						1	1
									2	1																1																						1	1
									2	1																1																						1	1
									2	1																1																						1	1
									2	1																1																						1	1
									1	1																1																						1	1
									1	1																1																						1	1
									1	1																1																						1	1
									1	1																1																						1	1
									1	1																1																						1	1
									1	1																1																						1	1
									1	1																1																						1	1
									1	1																1																						1	1
									1	1																1																						1	1
									1	1																1																						1	1
									1	1																1																						1	1
									1	1																1																						1	1
									1	1																1																						1	1
									1	1																1																						1	1
									1	1																1																						1	1
									1	1																1																						1	1
									1	1																1																						1	1
									1	1																1																						1	1
									1	1																1																						1	1
									1	1																1																						1	1
									1	1																1																						1	1
									1	1																1																						1	1
									1	1																1																						1	1
									1	1																1																						1	1
									1	1																1																						1	1
									1	1																1																						1	1
									1	1																1																						1	1
									1	1																1																						1	1
									1	1																1																						1	1
									1	1																1																						1	1
									1	1																1																						1	1
									1	1																1																						1	1
									1	1																1																						1	1
									1	1																1																						1	1
									1	1																1																						1	1
									1	1																1																						1	1
									1	1																1																						1	1
									1	1																1																							1
									1	1																1																							1
									1	1																1																							1
									1	1																1																							1
									1	1																1																							1
									1	1																1																							1
									1	1																1																							1
									1	1																1																							1
									1	1																1																							1
									1	1																1
									1	1																1
									1	1																1
									1	1																1
									1	1																1
									1	1																1
									1	1																1
									1	1																1
									1	1																1
									1	1																1
									1	1																1
									1	1																1
									1	1																1
									1	1
									1	1
									1	1
									1	1
									1	1
									1	1
									1	1
									1	1
									1	1
									1	1
									1	1
									1	1
									1	1
									1	1
									1	1
									1	1
									1	1
									1	1
									1	1
									1	1
									1	1
									1	1
									1	1
									1	1
									1	1
									1	1
									1	1
									1	1
									1	1
									1	1
									1	1
									1	1
									1	1
									1	1
									1	1
									1	1
									1	1
									1	1
									1	1
									1	1
									1	1
									1	1
									1	1
									1	1
									1	1
										1
										1
										1
										1
										1
										1
										1
										1
										1
										1
										1
										1
										1
										1
										1
										1
										1
										1
										1
