# Supplementary material for: Host casein kinase 1-mediated phosphorylation modulates phase separation of a rhabdovirus phosphoprotein and virus infection
Source: eLife journal article supplement (doi:10.7554/elife.74884), 2022-02-22
Supplement: supp [file elife_poa_e74884_Figure_1_figure_supplement_1.pdf › elife_poa_e74884_Figure_1_figure_supplement_1.pdf]

## Figure 1–Figure supplement 1

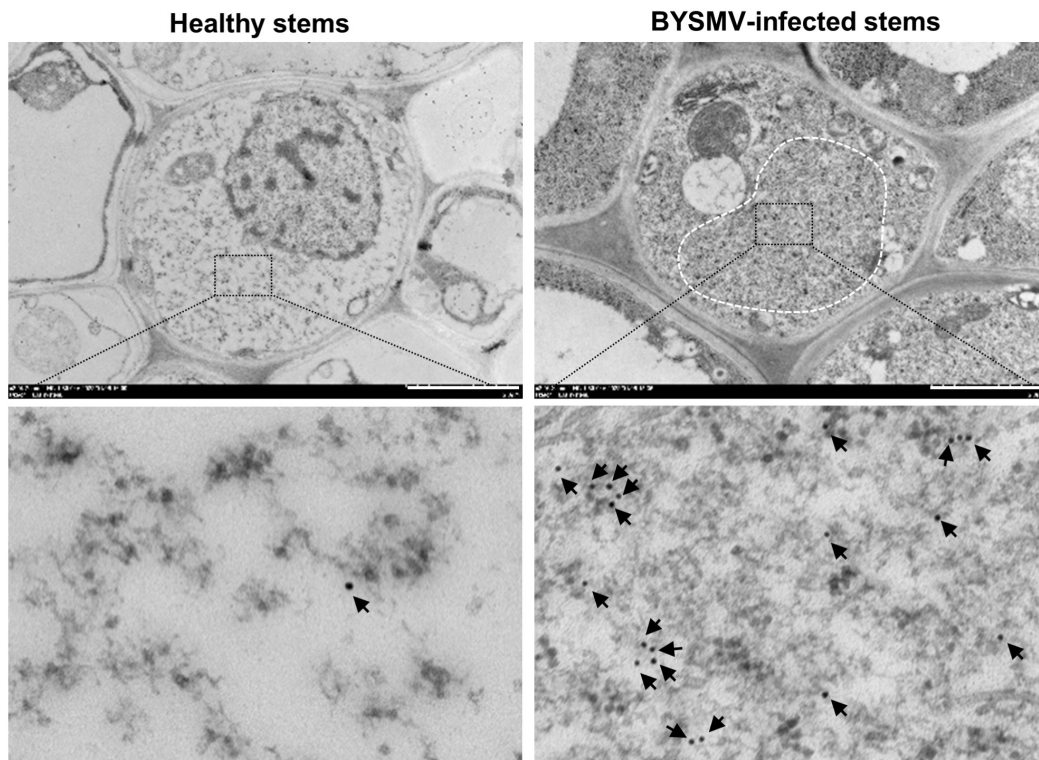

**Figure 1–Figure supplement 1. Immunoelectron microscopy detecting the BYSMV P protein in BYSMV-RFP-infected stems.** BYSMV-RFP-infected stems at 9 dpi or healthy stems were subjected to immunoelectron microscopy. P-specific antiserum showed specific labeling of BYSMV viroplasm (black arrows) in the cytoplasm. The electron dense granular structure of the BYSMV viroplasm was highlighted by white dotted line. Scale bars, 2  $\mu$ m.
