# Supplementary material for: Host casein kinase 1-mediated phosphorylation modulates phase separation of a rhabdovirus phosphoprotein and virus infection
Source: eLife journal article supplement (doi:10.7554/elife.74884), 2022-02-22
Supplement: supp [file elife_poa_e74884_Figure_1_figure_supplement_2.pdf › elife_poa_e74884_Figure_1_figure_supplement_2.pdf]

## Figure 1–Figure supplement 2

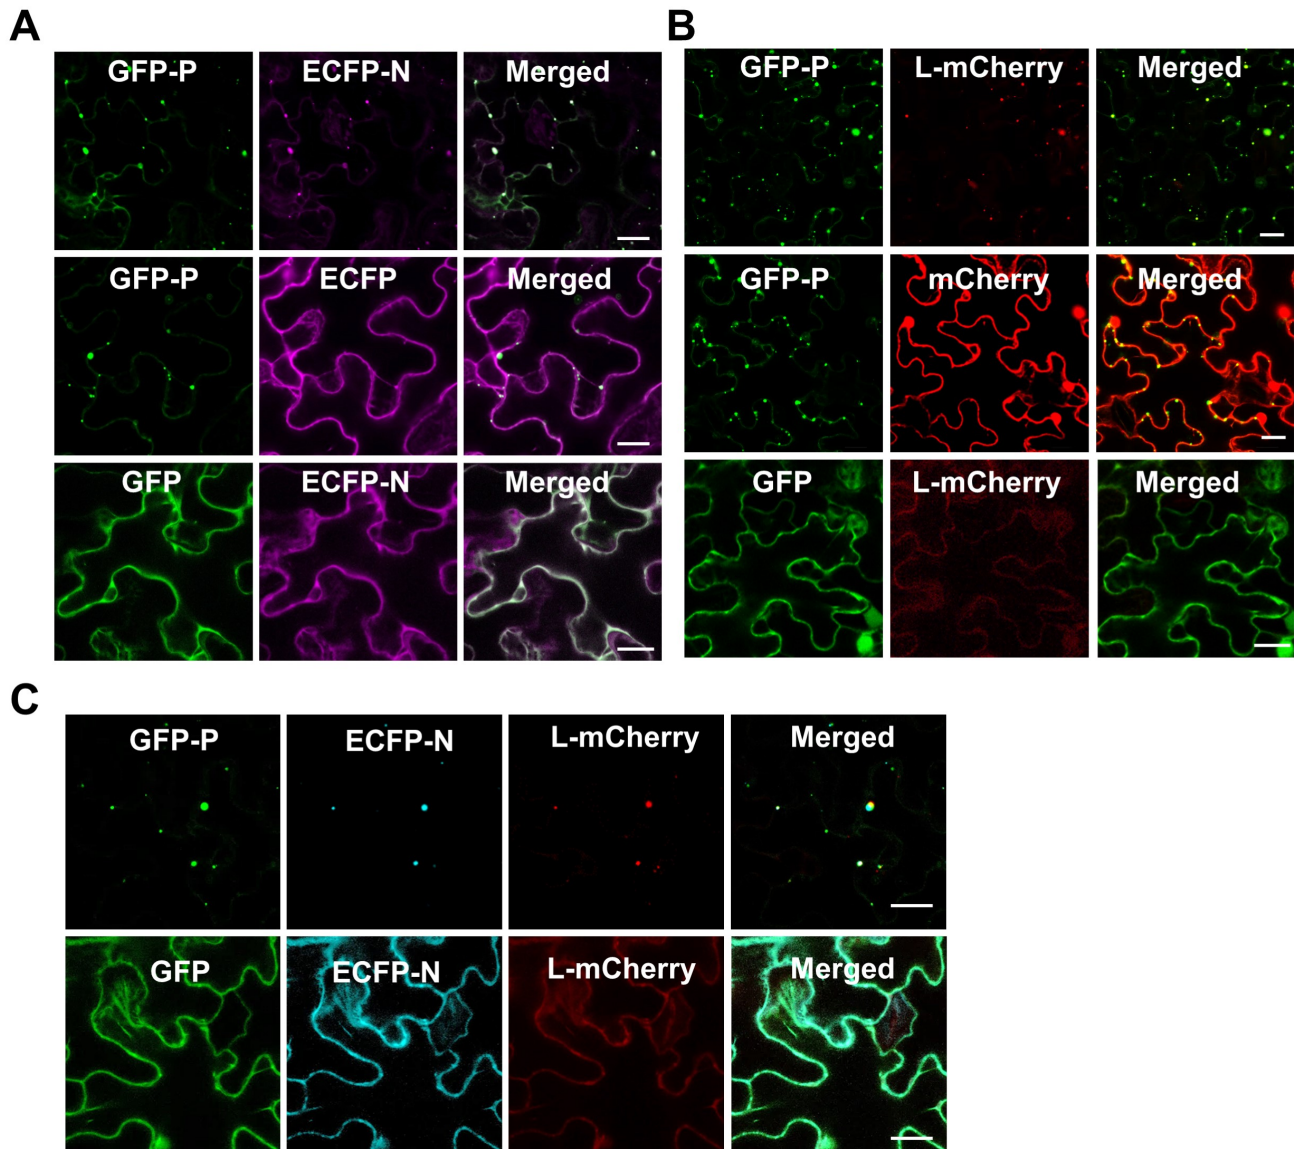

**Figure 1–Figure supplement 2. BYSMV P forms spherule granule recruiting N and L proteins.**

**(A)** Confocal images showing subcellular localization of GFP-P/GFP and ECFP-N/ECFP transiently expressed in different combinations in epidermal cells of *N. benthamiana* leaves. Scale bars, 20  $\mu\text{m}$ .

**(B)** Confocal images showing subcellular localization of GFP-P/GFP and L-mCherry/mCherry transiently expressed in different combinations in epidermal cells of *N. benthamiana* leaves. Scale bars, 20  $\mu\text{m}$ .

**(C)** Confocal images showing subcellular localization of CFP-N and L-mCherry co-expressed with GFP or GFP-P in epidermal cells of *N. benthamiana* leaves at 2 dpi. Scale bars, 20  $\mu\text{m}$ .
