# Supplementary material for: Host casein kinase 1-mediated phosphorylation modulates phase separation of a rhabdovirus phosphoprotein and virus infection
Source: eLife journal article supplement (doi:10.7554/elife.74884), 2022-02-22
Supplement: supp [file elife_poa_e74884_Figure_1_figure_supplement_3.pdf › elife_poa_e74884_Figure_1_figure_supplement_3.pdf]

## Figure 1–Figure supplement 3

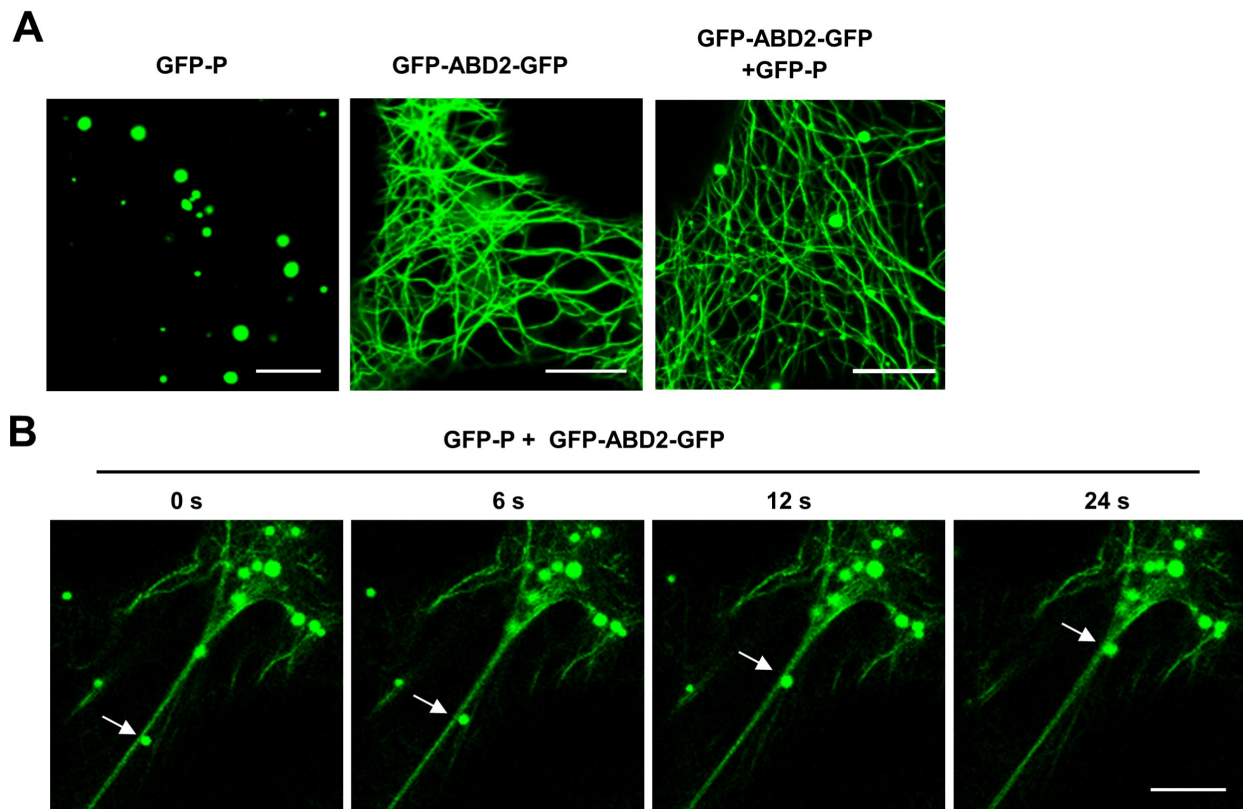

**Figure 1–Figure supplement 3. GFP-P moved along the actin filaments.** (A) Subcellular localization of GFP-P or GFP-ABD2-GFP expressed alone or together in *N. benthamiana* leaf epidermal cells at 2 dpi. Scale bars, 10  $\mu$ m. (B) Subcellular localization of GFP-P granules with GFP-ABD2-GFP-labeled actin filaments at 2 dpi. White arrows indicate that GFP-P granules moved along the actin filaments. Scale bar, 10  $\mu$ m.
