# Supplementary material for: Host casein kinase 1-mediated phosphorylation modulates phase separation of a rhabdovirus phosphoprotein and virus infection
Source: eLife journal article supplement (doi:10.7554/elife.74884), 2022-02-22
Supplement: supp [file elife_poa_e74884_Figure_1_figure_supplement_4.pdf › elife_poa_e74884_Figure_1_figure_supplement_4.pdf]

## Figure 1–Figure supplement 4

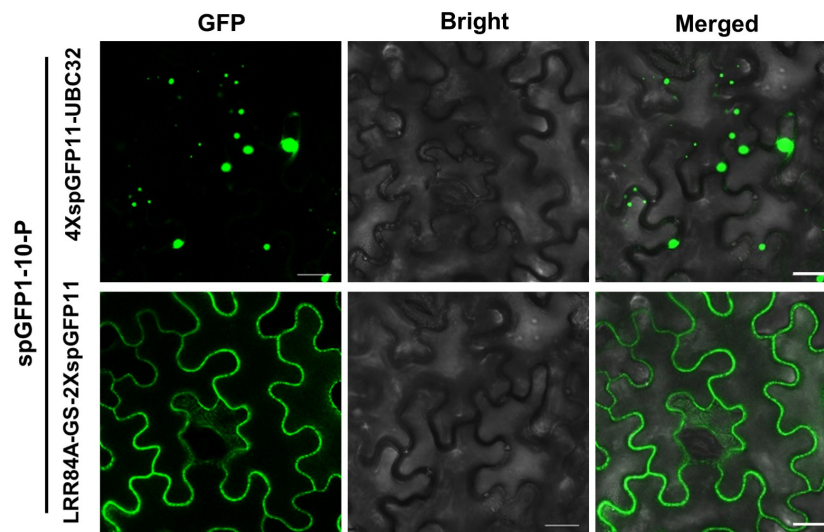

**Figure 1–Figure supplement 4. GFP-P P forms liquid structures on ER network.** Confocal micrographs of *N. benthamiana* leaf epidermal cells expressing spGFP1-10-P with 4×spGFP11-UBC32 or LRR84A-GS-2×spGFP11 at 2 dpi. Scale bars, 20  $\mu$ m.
