# Supplementary material for: Host casein kinase 1-mediated phosphorylation modulates phase separation of a rhabdovirus phosphoprotein and virus infection
Source: eLife journal article supplement (doi:10.7554/elife.74884), 2022-02-22
Supplement: supp [file elife_poa_e74884_Figure_1_figure_supplement_5.pdf › elife_poa_e74884_Figure_1_figure_supplement_5.pdf]

## Figure 1–Figure supplement 5

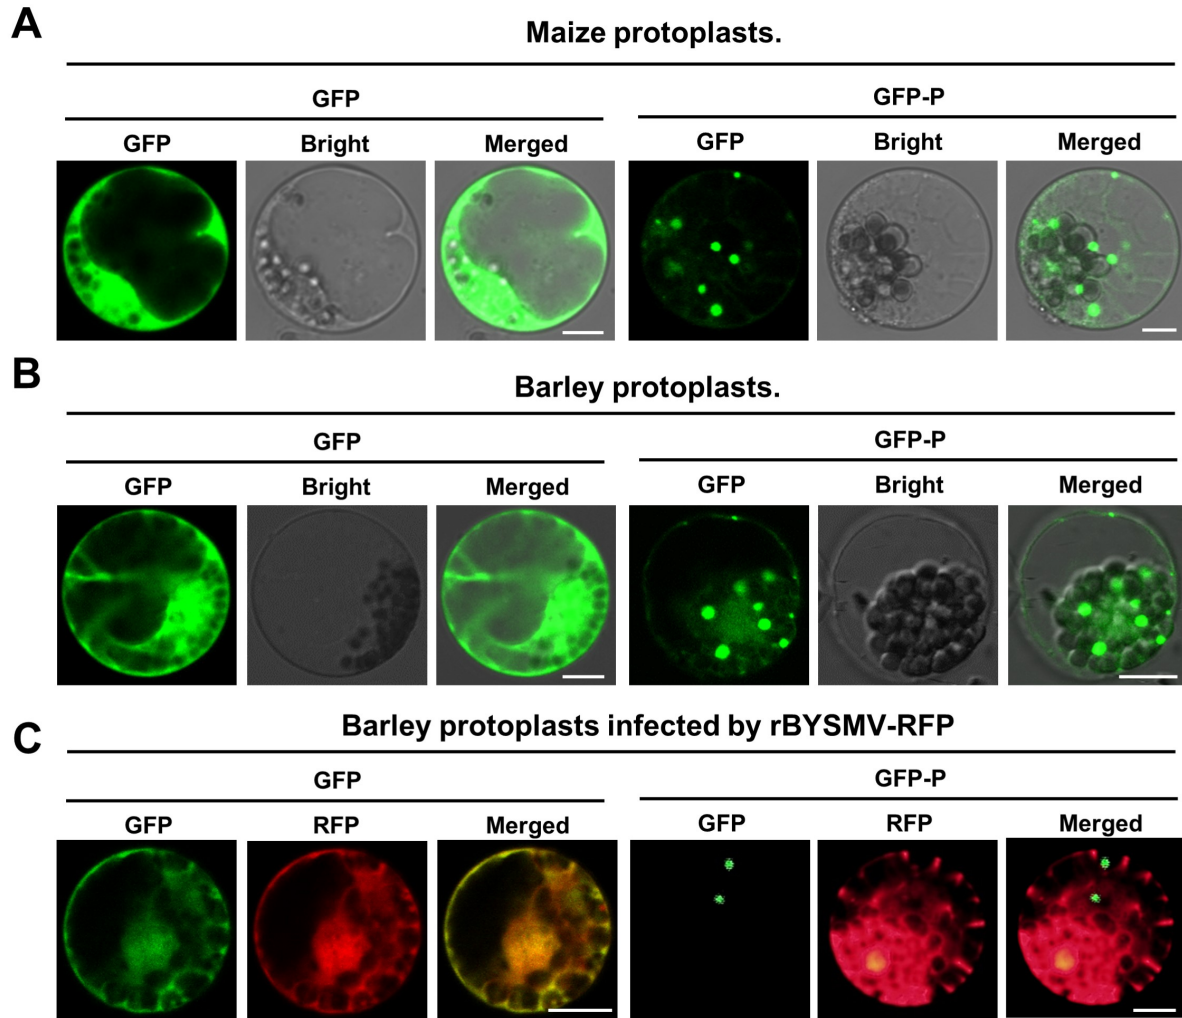

**Figure 1–Figure supplement 5. Phase separation of P protein in maize and barley protoplasts.**

(A) Confocal images showing subcellular distribution of GFP and GFP-P in maize protoplasts. Images were captured at 12–18 h post transfection. Scale bars, 10  $\mu$ m. (B) Confocal images showing subcellular distribution of GFP and GFP-P in barley protoplasts. Images were captured at 12–18 h post transfection. Scale bars, 10  $\mu$ m. (C) Confocal images showing subcellular distribution of GFP and GFP-P in barley protoplasts infected by rBYSMV-RFP. Images were captured at 12–18 h post transfection. Scale bars, 10  $\mu$ m.
