# Supplementary material for: Host casein kinase 1-mediated phosphorylation modulates phase separation of a rhabdovirus phosphoprotein and virus infection
Source: eLife journal article supplement (doi:10.7554/elife.74884), 2022-02-22
Supplement: supp [file elife_poa_e74884_Figure_1_figure_supplement_6.pdf › elife_poa_e74884_Figure_1_figure_supplement_6.pdf]

Figure 1–Figure supplement 6

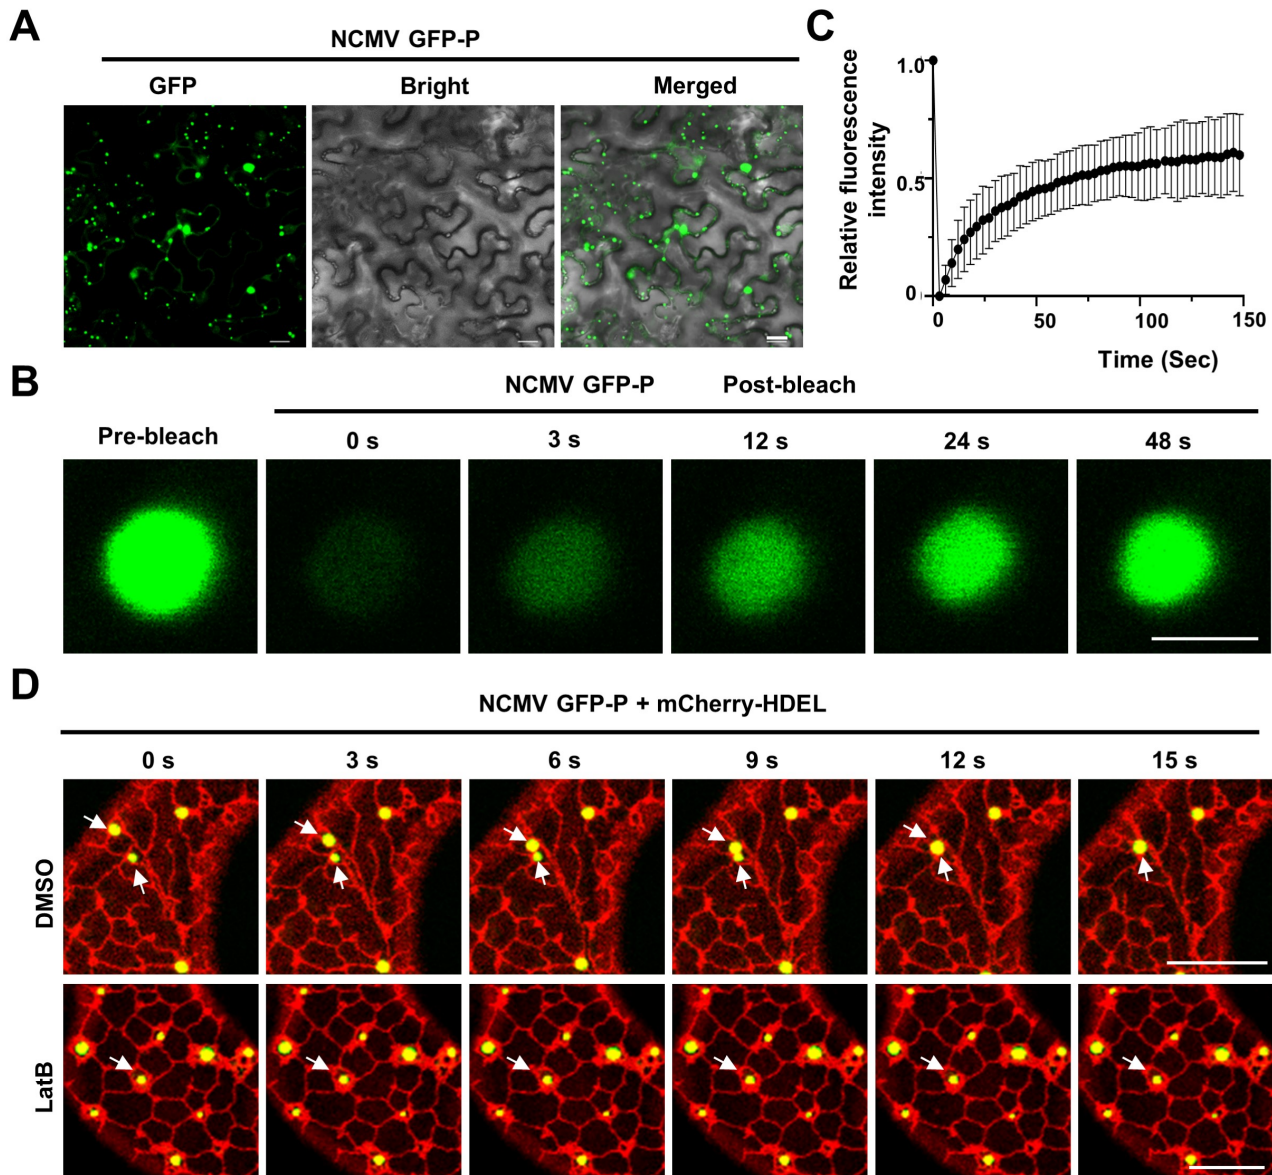

**Figure 1–Figure supplement 6. NCMV P forms liquid structures *in vivo*.** (A) Confocal images showing subcellular distribution of NCMV GFP-P transiently expressed in *N. benthamiana* leaf epidermal cells at 2 dpi. Scale bar = 20  $\mu$ m. (B) Representative FRAP images of NCMV GFP-P granules transiently expressed in epidermal cells of *N. benthamiana* leaves at 2 dpi. Leaves were treated with 10  $\mu$ M LatB to inhibit traffic of NCMV GFP-P granules at 3 h before FRAP imaging. Scale bars, 2  $\mu$ m. (C) Representative FRAP recovery curves of NCMV GFP-P granules as shown in panel B. The intensity of each body was normalized against their pre-bleach fluorescence. Data were expressed as the mean  $\pm$  SD of 15 foci. (D) Time-lapse confocal micrographs showing the localization of NCMV GFP-P and mCherry-HDEL transiently expressed in *N. benthamiana* leaf epidermal cells at 2 dpi. Leaves were treated with DMSO or 10  $\mu$ M LatB at 3 h before imaging. White arrows indicate that GFP-P granules undergo fusion. Scale bars, 10  $\mu$ m.
