# Supplementary material for: Host casein kinase 1-mediated phosphorylation modulates phase separation of a rhabdovirus phosphoprotein and virus infection
Source: eLife journal article supplement (doi:10.7554/elife.74884), 2022-02-22
Supplement: supp [file elife_poa_e74884_Figure_2_figure_supplement_1.pdf › elife_poa_e74884_Figure_2_figure_supplement_1.pdf]

## Figure 2–Figure supplement 1

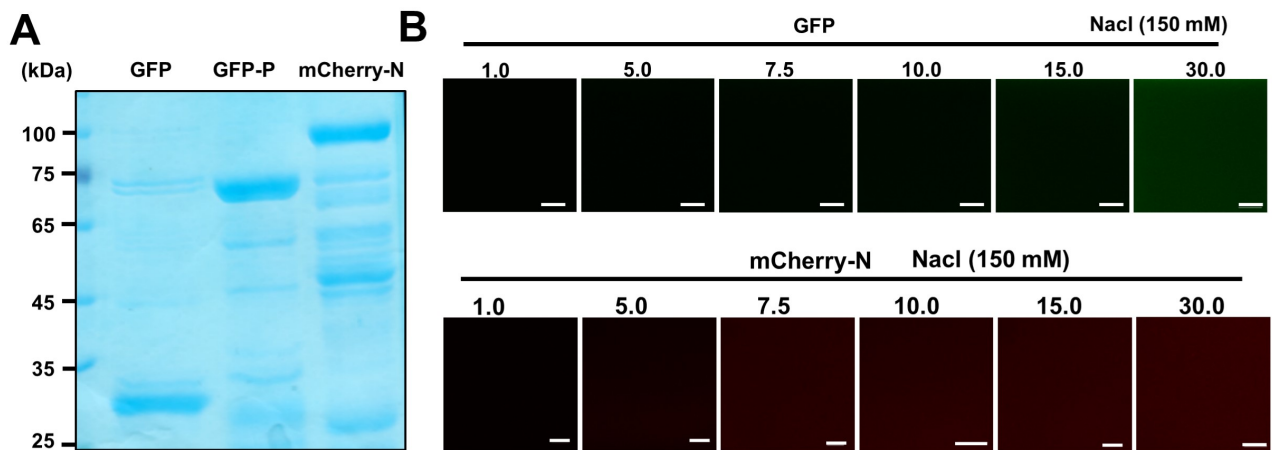

**Figure 2–Figure supplement 1. GFP and BYSMV mCherry-N are deficient in forming liquid droplets *in vitro*.** (A) SDS-PAGE showing purified GFP, GFP-P, and mCherry-N proteins. (B) Confocal images showing that neither GFP nor mCherry-N formed droplets at the concentration of 1-30  $\mu$ M in 150 mM NaCl. Scale bars, 20  $\mu$ m.
