# Supplementary material for: Host casein kinase 1-mediated phosphorylation modulates phase separation of a rhabdovirus phosphoprotein and virus infection
Source: eLife journal article supplement (doi:10.7554/elife.74884), 2022-02-22
Supplement: supp [file elife_poa_e74884_Figure_4_figure_supplement_1.pdf › elife_poa_e74884_Figure_4_figure_supplement_1.pdf]

## Figure 4—Figure supplement 1

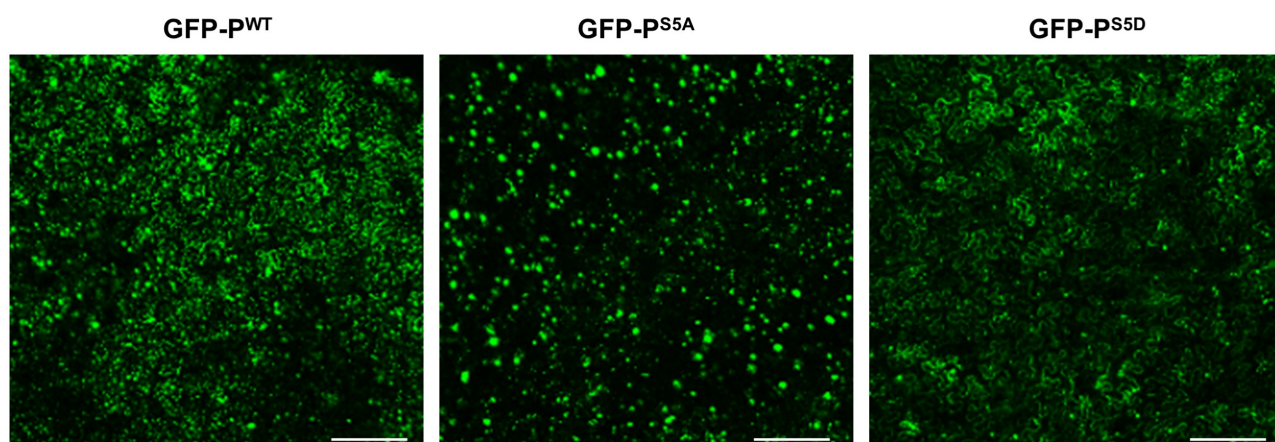

**Figure 4—Figure supplement 1.** Confocal images showing subcellular distribution of GFP-P<sup>WT</sup>, GFP-P<sup>S5A</sup>, and P-GFP<sup>S5D</sup> in *N. benthamiana* leaf epidermal cells at 2 dpi. Scale bars, 20 μm.
