# Supplementary material for: Host casein kinase 1-mediated phosphorylation modulates phase separation of a rhabdovirus phosphoprotein and virus infection
Source: eLife journal article supplement (doi:10.7554/elife.74884), 2022-02-22
Supplement: supp [file elife_poa_e74884_Figure_4_figure_supplement_2.pdf › elife_poa_e74884_Figure_4_figure_supplement_2.pdf]

## Figure 4—Figure supplement 2

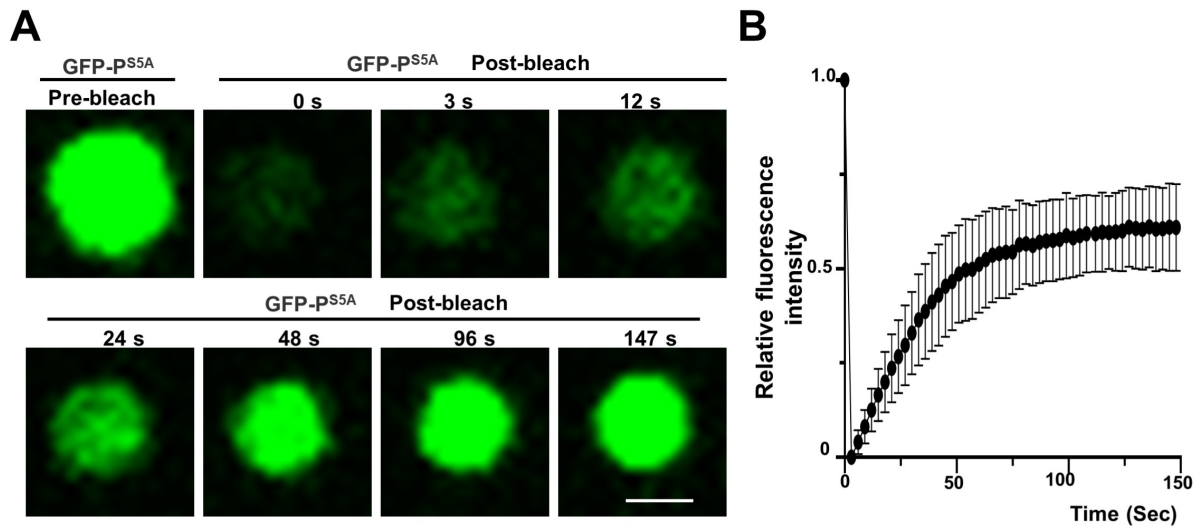

**Figure 4—Figure supplement 2. FRAP experiment analysis liquid quality of GFP-P<sup>S5A</sup> granules.** (A) Representative FRAP images of GFP-P<sup>S5A</sup> granules in epidermal cells of *N. benthamiana* leaves at 2 dpi. Leaves were treated with 10 μM LatB to inhibit movement of GFP-P<sup>S5A</sup> granules at 3 h before photobleaching. Scale bar, 1 μm. (B) FRAP recovery curves of GFP-P<sup>S5A</sup> granules. The intensity of each granule was normalized against their pre-bleach fluorescence. Data were presented as mean ± SD of 15 granules.
