# Supplementary material for: Host casein kinase 1-mediated phosphorylation modulates phase separation of a rhabdovirus phosphoprotein and virus infection
Source: eLife journal article supplement (doi:10.7554/elife.74884), 2022-02-22
Supplement: supp [file elife_poa_e74884_Figure_4_figure_supplement_3.pdf › elife_poa_e74884_Figure_4_figure_supplement_3.pdf]

## Figure 4–Figure supplement 3

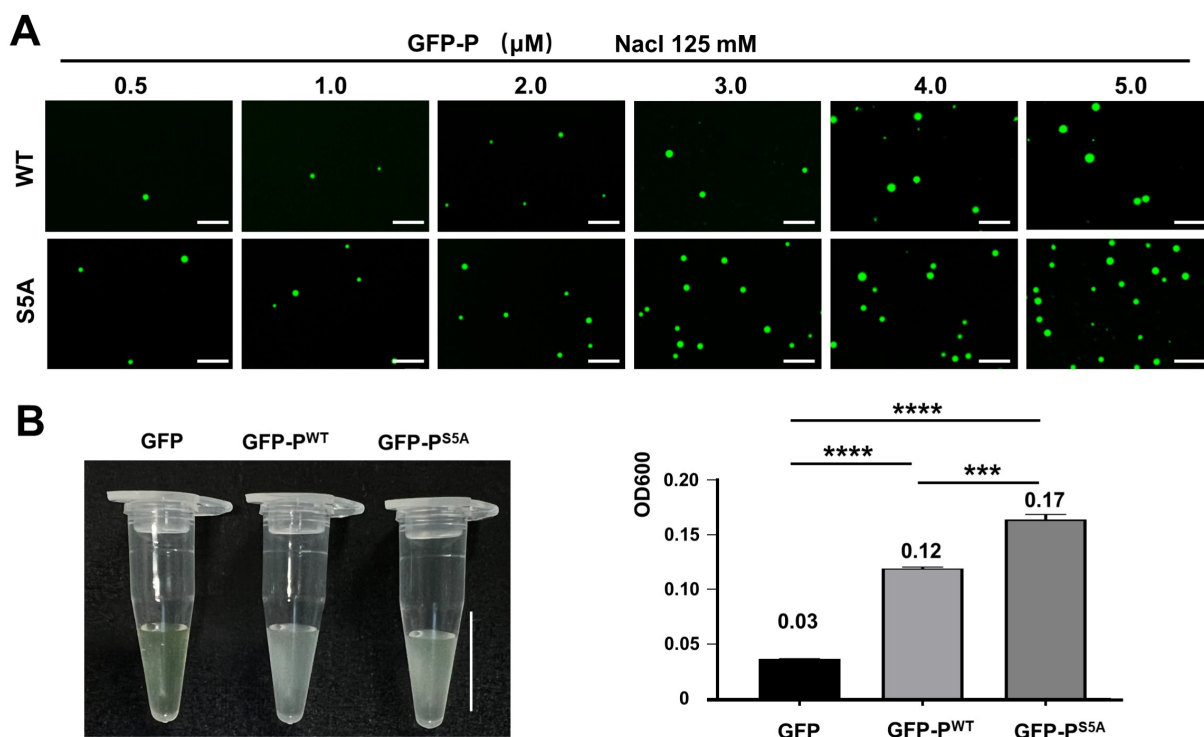

**Figure 4–Figure supplement 3. Phase separation of GFP-P<sup>WT</sup> and GFP-P<sup>S5A</sup>.** (A) Confocal images showing that GFP-P<sup>WT</sup> and GFP-P<sup>S5A</sup> formed droplets at different concentrations and 125 mM NaCl. Scale bars, 20  $\mu$ m. (B) Turbidity assays (OD600) using 12  $\mu$ M GFP, GFP-P<sup>WT</sup>, and P-GFP<sup>S5A</sup> in buffer of 200 mM NaCl and 20% PEG4000. The tubes were shown in left and OD600 values were analyzed. Error bars indicate SD (n=3). Scale bars, 1 cm. \*\*\*\*  $p < 0.0001$ , \*\*\*  $p < 0.001$  (Student's t-test).
