# Supplementary material for: Host casein kinase 1-mediated phosphorylation modulates phase separation of a rhabdovirus phosphoprotein and virus infection
Source: eLife journal article supplement (doi:10.7554/elife.74884), 2022-02-22
Supplement: supp [file elife_poa_e74884_Figure_5_figure_supplement_1.pdf › elife_poa_e74884_Figure_5_figure_supplement_1.pdf]

## Figure 5–Figure supplement 1

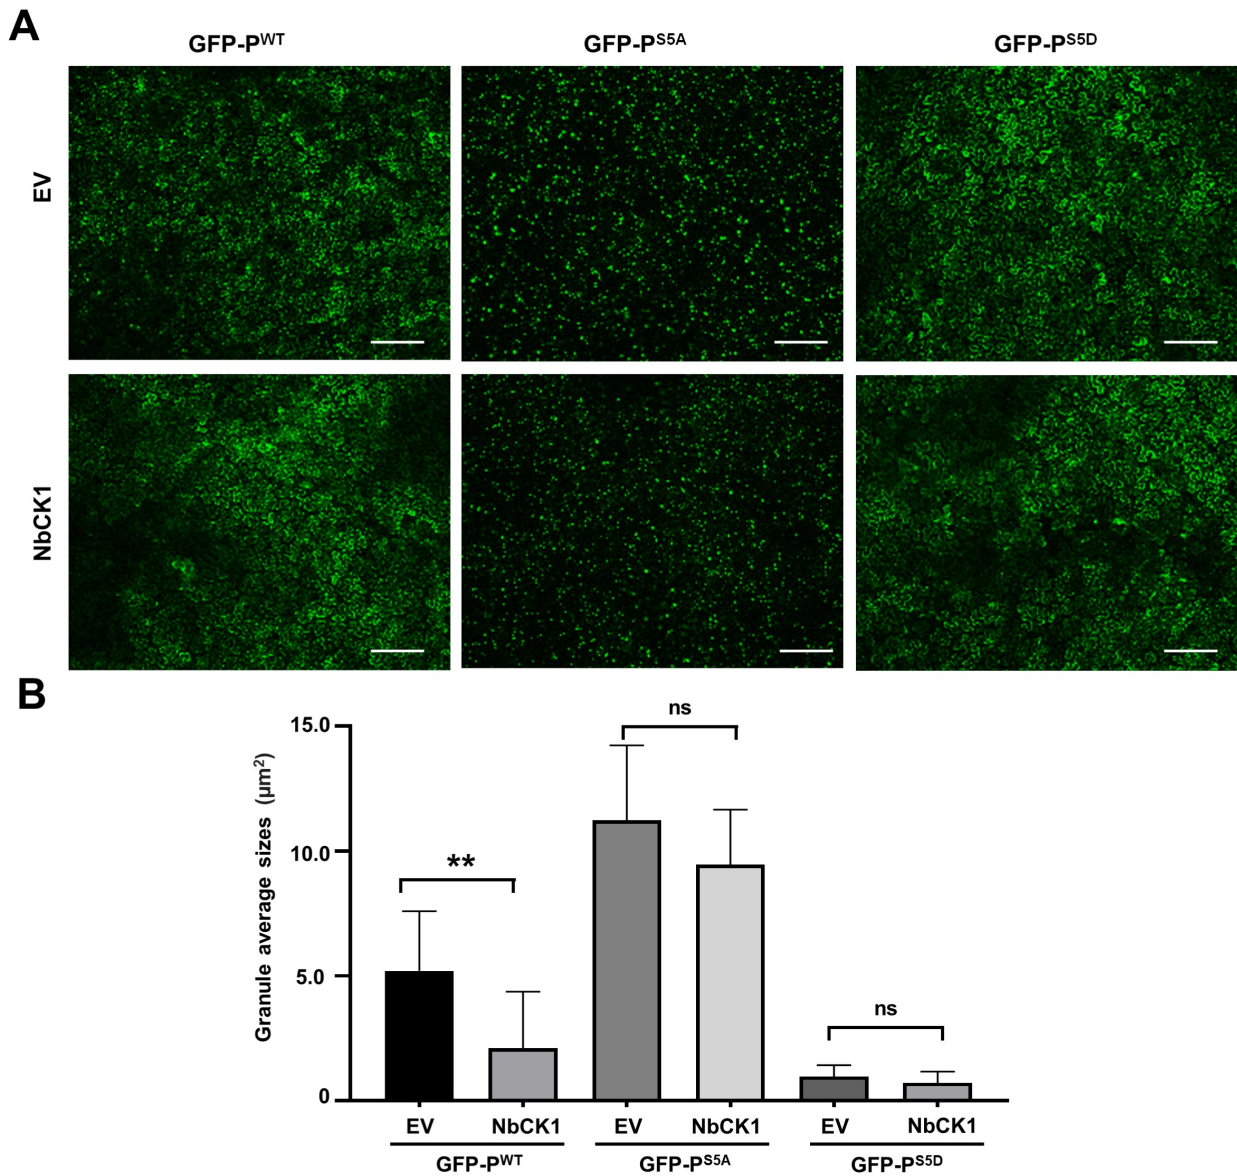

**Figure 5–Figure supplement 1. Host CK1 inhibits phase separation of BYSMV P *in vivo*.** (A) Confocal images showing subcellular distribution of GFP-P<sup>WT</sup>, GFP-P<sup>S5A</sup>, and P-GFP<sup>S5D</sup> co-expressed with empty vector (EV) or NbCK1 in *N. benthamiana* leaves at 2 dpi. Scale bars, 200  $\mu\text{m}$ . (B) Statistical analyses of average sizes of GFP granules ( $> 0.2 \mu\text{m}^2$ ) from eight fields ( $175 \mu\text{m} \times 175 \mu\text{m}$ ) of *N. benthamiana* leaves expressing GFP-P<sup>WT</sup>, GFP-P<sup>S5A</sup> and GFP-P<sup>S5D</sup> co-expressed with empty vector (EV) or NbCK1. Error bars indicate SD. \*\*  $p < 0.01$  (Student's t-test).
