# Supplementary material for: Host casein kinase 1-mediated phosphorylation modulates phase separation of a rhabdovirus phosphoprotein and virus infection
Source: eLife journal article supplement (doi:10.7554/elife.74884), 2022-02-22
Supplement: supp [file elife_poa_e74884_Figure_5_figure_supplement_2.pdf › elife_poa_e74884_Figure_5_figure_supplement_2.pdf]

## Figure 5–Figure supplement 2

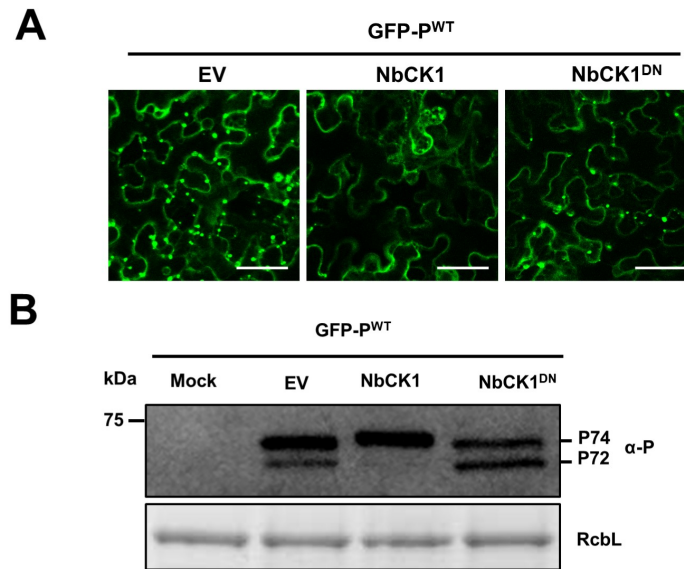

**Figure 5–Figure supplement 2. Host CK1 inhibits phase separation of BYSMV P *in vivo*.** (A) Confocal images showing subcellular distribution of GFP-P<sup>WT</sup> co-expressed with empty vector (EV), NbCK1 or NbCK1<sup>DN</sup> in *N. benthamiana* leaf epidermal cells at 2 dpi. Scale bars, 100  $\mu$ m. (B) Western blotting detecting accumulation of GFP-P<sup>WT</sup> in the leaves as shown in panel A.
