# Supplementary material for: Host casein kinase 1-mediated phosphorylation modulates phase separation of a rhabdovirus phosphoprotein and virus infection
Source: eLife journal article supplement (doi:10.7554/elife.74884), 2022-02-22
Supplement: supp [file elife_poa_e74884_Figure_5_figure_supplement_3.pdf › elife_poa_e74884_Figure_5_figure_supplement_3.pdf]

## Figure 5–Figure supplement 3

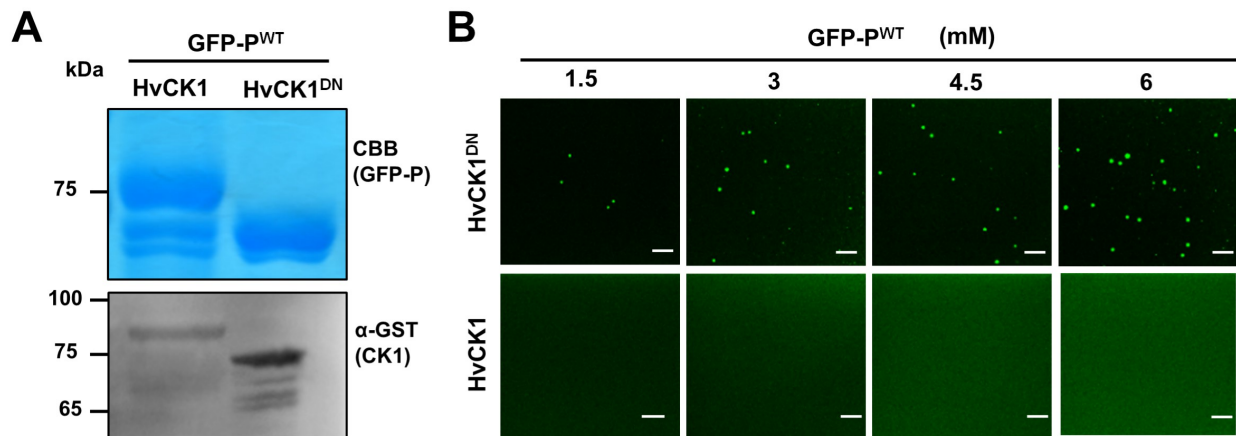

**Figure 5–Figure supplement 3. Phase separation of BYSMV P is inhibited by P protein phosphorylation.** (A) SDS-PAGE showing purified GFP-P<sup>WT</sup> purified from *E. coli* co-expressing HvCK1 or HvCK1<sup>DN</sup>. Accumulation of GST-tagged HvCK1 or HvCK1<sup>DN</sup> was examined by Western blotting analyses with anti-GST antibodies. (B) Confocal images showing droplet formation of GFP-P<sup>WT</sup> purified from *E. coli* co-expressing HvCK1<sup>DN</sup>. GFP-P<sup>WT</sup> was diluted to different concentration in 125 mM NaCl. Scale bars, 20 μm.
