# Supplementary material for: Host casein kinase 1-mediated phosphorylation modulates phase separation of a rhabdovirus phosphoprotein and virus infection
Source: eLife journal article supplement (doi:10.7554/elife.74884), 2022-02-22
Supplement: supp [file Figure 4D-source data 2.xlsx]

## Sheet: Sheet1
1)	>2.0 mm2
		Repeats
		1	2	3	4	5	6	7	8	Mean	SEM
	GFP-PWT	0.0918367	0.14433	0.161017	0.154362	0.171171	0.172043	0.219048	0.198347	0.164019	0.0378386
	GFP-PS5A	0.293103	0.32	0.325	0.3	0.39726	0.367647	0.321429	0.337838	0.332785	0.034642
	t-test	Summary	Adjusted P Value
	GFP-PWT vs. GFP-PS5A	****	<0.0001
2)	0.2-2.0 mm2
		Repeats
		1	2	3	4	5	6	7	8	Mean	SEM
	GFP-PWT	0.908163	0.85567	0.838983	0.845638	0.828829	0.827957	0.780952	0.801653	0.835981	0.0378386
	GFP-PS5A	0.706897	0.68	0.675	0.7	0.60274	0.632353	0.678571	0.662162	0.667215	0.034642
	t-test	Summary	Adjusted P Value
	GFP-PWT vs. GFP-PS5A	****	<0.0001

## Sheet: Sheet2
GFP-PWT	P18	P16	P14	P12	P10	P8	P2	P3	GFP-PS5A	5A25	5A23	5A18	5A16	5A14	5A4	5A6	5A2	GFP-PS5D	5D5	5D7	5D9	5D11	5D15	5D17	5D19	5D21
	7.53741	12.5548	14.9613	18.8662	14.3029	14.3256	6.69739	10.6704		26.4263	21.0457	20.2057	32.0794	38.686	37.0286	19.0024	37.3692		1.99787	4.85845	10.9883	39.753	1.20326	4.94926	8.71796	7.24227
	4.97196	5.31251	6.08441	13.9397	7.06064	7.31038	6.17522	8.92229		17.1862	12.1688	11.7375	24.4512	26.7896	24.3149	16.1873	26.5852		1.81624	3.15572	6.47036	21.9311	0.840012	1.58921	6.78821	1.29407
	4.90385	3.83681	5.92549	10.3526	6.08441	6.35685	5.83468	8.37742		14.8705	9.17202	7.40119	21.0457	22.1128	22.2036	8.10498	22.9755		1.31678	2.74707	5.10818	14.8705	0.840012	1.45299	6.35685	1.27137
	4.54061	3.47356	5.67576	7.33308	6.06171	6.17522	5.06278	7.06064		12.6229	8.80878	6.81091	11.4196	17.8219	20.8641	7.37848	20.41		1.20326	2.72436	4.76764	12.3732	0.681091	1.08975	4.56331	1.13515
	3.08761	3.26924	5.58495	6.7428	5.38062	5.51684	4.85845	6.90172		11.4877	8.71796	6.49307	9.35365	11.1018	19.2749	7.08335	17.0273		0.794606	2.61085	2.45193	12.1688	0.612982	0.930824	3.67789	0.7492
	2.61085	3.15572	5.40332	5.08548	5.38062	5.13088	4.54061	6.78821		10.0347	8.49093	6.19793	9.14932	10.6931	17.89	6.99253	16.051		0.7492	1.79354	1.56651	7.92336	0.431358	0.840012	2.9968	0.635685
	2.36112	2.95139	5.35792	4.22276	4.54061	4.92656	4.15465	6.78821		7.03794	8.35472	4.99467	8.85418	9.87582	14.9613	5.04007	15.3018		0.635685	1.29407	1.18056	7.37848	0.408655	0.703794	1.86165	0.635685
	2.2703	2.76977	4.90385	4.15465	4.10925	3.90492	3.92762	6.15252		5.9936	7.5147	4.5179	8.60445	7.96876	13.1451	4.69953	14.2575		0.317842	1.02164	1.06704	6.33415	0.408655	0.544873	1.79354	0.590279
	2.2249	2.54274	4.67682	2.9968	3.7687	3.15572	3.36005	5.83468		5.13088	6.51577	4.13195	8.12768	6.81091	12.9634	4.5179	12.5775		0.295139	0.908121	0.930824	4.83575	0.340545	0.204327	1.36218	0.590279
	1.97516	2.33841	3.13302	2.95139	3.51897	2.9968	3.33735	5.04007		4.40439	5.28981	3.88222	6.81091	6.28874	12.8045	4.4952	12.2596		0.249733	0.885418	0.908121	2.15679	0.272436	0.181624	0.340545	0.567576
	1.95246	2.2476	2.76977	2.90599	3.36005	2.86058	3.33735	4.22276		4.26817	4.56331	3.85952	6.51577	5.94819	12.0099	3.49627	9.26284		0.22703	0.658388	0.703794	1.90705	0.272436	0.136218	0.22703	0.499467
	1.90705	2.2249	2.72436	2.86058	3.13302	2.56544	3.26924	4.15465		4.22276	4.08655	3.7233	5.78927	5.88008	9.64879	3.0195	8.67256		0.204327	0.52217	0.567576	1.86165	0.249733	0.113515	0.204327	0.499467
	1.90705	2.17949	2.63355	2.86058	3.06491	2.47463	3.15572	4.06384		3.88222	4.08655	3.7233	5.51684	5.19899	8.85418	2.63355	7.80984		0.0908121	0.385952	0.544873	1.40759	0.249733	0.0681091	0.181624	0.408655
	1.88435	2.13408	2.38382	2.86058	2.83788	2.36112	2.92869	3.97303		2.58815	3.11032	3.51897	5.2671	5.15359	7.87795	2.61085	7.35578		0.0454061	0.295139	0.52217	1.08975	0.181624	0.0681091	0.181624	0.408655
	1.61192	1.97516	2.13408	2.83788	2.70166	2.2703	2.79247	3.70059		2.52004	2.2249	3.24653	4.79034	5.10818	6.90172	2.2703	7.06064		0.0454061	0.295139	0.52217	0.908121	0.158921	0.0681091	0.136218	0.408655
	1.4984	1.83895	2.08868	2.81518	2.63355	2.13408	2.74707	3.67789		2.36112	2.08868	3.20113	4.42709	4.56331	6.81091	2.20219	5.53954		0.0454061	0.272436	0.499467	0.862715	0.113515	0.0681091	0.113515	0.385952
	1.4757	1.74813	2.06598	2.63355	2.40652	1.95246	2.61085	3.60978		2.17949	1.88435	3.11032	4.17736	4.44979	6.58388	2.11138	5.19899		0.0454061	0.22703	0.476764	0.817309	0.113515	0.0681091	0.113515	0.363248
	1.4757	1.68002	2.04327	2.54274	2.40652	1.95246	2.49733	3.04221		1.70273	1.79354	3.11032	3.92762	4.10925	5.35792	2.04327	5.13088		0.022703	0.204327	0.454061	0.590279	0.0908121	0.0454061	0.0908121	0.340545
	1.45299	1.63462	2.02057	2.31571	2.11138	1.88435	2.38382	3.0195		1.54381	1.65732	3.04221	3.92762	3.47356	5.33521	1.97516	4.72223		0.022703	0.181624	0.385952	0.454061	0.0908121	0.0454061	0.0908121	0.317842
	1.43029	1.63462	1.95246	2.31571	1.99787	1.83895	2.2703	2.72436		1.38488	1.27137	3.0195	3.83681	3.36005	5.17629	1.90705	4.63142		0.022703	0.181624	0.317842	0.431358	0.0681091	0.0454061	0.0908121	0.317842
	1.43029	1.54381	1.86165	2.20219	1.99787	1.68002	2.2476	2.70166		1.27137	1.15785	2.54274	3.22383	2.9741	4.83575	1.90705	2.9741		0.022703	0.158921	0.317842	0.272436	0.0681091	0.0454061	0.0681091	0.295139
	1.36218	1.54381	1.81624	2.17949	1.95246	1.61192	2.2249	2.38382		0.998933	1.04434	2.47463	2.83788	2.90599	4.38168	1.86165	2.72436		0.022703	0.136218	0.22703	0.249733	0.0681091	0.022703	0.0454061	0.249733
	1.27137	1.5211	1.77084	2.15679	1.95246	1.61192	2.11138	2.36112		0.908121	1.02164	2.45193	2.49733	2.83788	2.58815	1.81624	2.56544		0	0.136218	0.204327	0.22703	0.0681091	0.022703	0.0454061	0.22703
	1.24867	1.4984	1.74813	1.88435	1.95246	1.43029	1.97516	2.33841		0.908121	0.97623	2.36112	2.45193	2.76977	2.56544	1.81624	2.40652		0	0.113515	0.204327	0.22703	0.0681091	0.022703	0.0454061	0.22703
	1.20326	1.4757	1.72543	1.74813	1.90705	1.38488	1.97516	1.99787		0.885418	0.862715	2.33841	1.86165	2.61085	2.2476	1.79354	2.13408		0	0.113515	0.181624	0.113515	0.0681091	0.022703	0.0454061	0.22703
	1.18056	1.45299	1.72543	1.74813	1.72543	1.38488	1.90705	1.88435		0.726497	0.7492	2.33841	1.61192	2.31571	1.74813	1.72543	1.77084		0	0.113515	0.181624	0.113515	0.0454061	0.022703	0.0454061	0.204327
	1.13515	1.38488	1.65732	1.72543	1.61192	1.29407	1.90705	1.81624		0.703794	0.658388	1.61192	1.5211	2.2249	1.72543	1.56651	1.72543		0	0.113515	0.158921	0.113515	0.0454061	0.022703	0.0454061	0.181624
	1.13515	1.38488	1.61192	1.61192	1.4757	1.22596	1.88435	1.70273		0.681091	0.658388	1.54381	1.29407	2.2249	1.58921	1.54381	1.72543		0	0.113515	0.158921	0.113515	0.0454061	0.022703	0.0454061	0.136218
	1.08975	1.38488	1.58921	1.61192	1.38488	1.18056	1.83895	1.61192		0.635685	0.590279	1.40759	1.22596	2.2249	1.40759	1.08975	1.68002		0	0.113515	0.158921	0.0908121	0.022703	0.022703	0.0454061	0.136218
	1.06704	1.38488	1.56651	1.58921	1.36218	1.15785	1.81624	1.58921		0.635685	0.567576	1.40759	1.22596	1.99787	1.18056	1.04434	1.56651		0	0.113515	0.158921	0.0908121	0.022703	0.022703	0.0454061	0.113515
	0.97623	1.29407	1.5211	1.56651	1.36218	1.11245	1.74813	1.54381		0.567576	0.544873	1.22596	1.15785	1.97516	1.06704	1.04434	1.56651		0	0.0908121	0.136218	0.0908121	0.022703	0.022703	0.0454061	0.113515
	0.953527	1.27137	1.45299	1.4757	1.33948	1.08975	1.72543	1.36218		0.476764	0.52217	1.20326	1.13515	1.65732	1.06704	1.04434	1.40759		0	0.0908121	0.136218	0.0908121	0.022703	0.022703	0.0454061	0.0908121
	0.885418	1.20326	1.43029	1.45299	1.33948	1.08975	1.72543	1.36218		0.476764	0.499467	1.04434	1.08975	1.63462	1.04434	0.953527	1.36218		0	0.0908121	0.136218	0.0681091	0.022703	0.022703	0.0454061	0.0908121
	0.862715	1.18056	1.33948	1.43029	1.31678	1.06704	1.68002	1.33948		0.454061	0.476764	1.02164	1.08975	1.61192	0.930824	0.885418	1.29407		0	0.0908121	0.136218	0.0681091	0.022703	0.022703	0.0454061	0.0908121
	0.840012	1.13515	1.31678	1.40759	1.24867	0.998933	1.68002	1.33948		0.431358	0.385952	0.885418	1.06704	1.45299	0.817309	0.885418	1.22596		0	0.0908121	0.136218	0.0681091	0.022703	0.022703	0.0454061	0.0908121
	0.840012	1.11245	1.27137	1.38488	1.22596	0.953527	1.63462	1.33948		0.431358	0.363248	0.771903	0.953527	1.31678	0.7492	0.840012	1.08975		0	0.0908121	0.136218	0.0681091	0.022703	0.022703	0.0454061	0.0681091
	0.840012	1.11245	1.24867	1.33948	1.22596	0.885418	1.58921	1.27137		0.408655	0.363248	0.703794	0.953527	1.31678	0.658388	0.658388	0.953527		0	0.0908121	0.136218	0.0681091	0.022703	0.022703	0.0454061	0.0681091
	0.817309	1.08975	1.22596	1.27137	1.15785	0.885418	1.5211	1.24867		0.385952	0.340545	0.612982	0.930824	1.27137	0.658388	0.499467	0.930824		0	0.0908121	0.136218	0.0681091	0.022703	0.022703	0.0454061	0.0681091
	0.794606	1.08975	1.22596	1.27137	1.13515	0.862715	1.40759	1.22596		0.340545	0.317842	0.590279	0.862715	1.22596	0.635685	0.476764	0.840012		0	0.0681091	0.136218	0.0681091	0.022703	0.022703	0.0454061	0.0681091
	0.7492	1.04434	1.20326	1.24867	1.06704	0.862715	1.40759	1.13515		0.340545	0.317842	0.544873	0.771903	1.08975	0.635685	0.431358	0.817309		0	0.0681091	0.136218	0.0681091	0.022703	0.022703	0.0454061	0.0681091
	0.726497	0.97623	1.20326	1.22596	1.06704	0.862715	1.38488	1.08975		0.317842	0.295139	0.544873	0.7492	1.04434	0.590279	0.431358	0.794606		0	0.0681091	0.113515	0.0681091	0.022703	0.022703	0.022703	0.0681091
	0.726497	0.953527	1.20326	1.22596	1.04434	0.840012	1.36218	1.04434		0.295139	0.295139	0.544873	0.726497	1.02164	0.567576	0.408655	0.7492		0	0.0681091	0.113515	0.0681091	0.022703	0	0.022703	0.0681091
	0.726497	0.953527	1.15785	1.20326	1.04434	0.817309	1.36218	0.97623		0.295139	0.295139	0.52217	0.681091	0.885418	0.567576	0.385952	0.703794		0	0.0681091	0.113515	0.0681091	0.022703	0	0.022703	0.0681091
	0.726497	0.953527	1.15785	1.18056	1.02164	0.7492	1.36218	0.97623		0.295139	0.295139	0.499467	0.635685	0.7492	0.52217	0.340545	0.703794		0	0.0454061	0.113515	0.0681091	0.022703	0	0.022703	0.0681091
	0.703794	0.885418	1.13515	1.18056	0.953527	0.7492	1.31678	0.97623		0.272436	0.272436	0.499467	0.612982	0.726497	0.499467	0.317842	0.681091		0	0.0454061	0.0908121	0.0681091	0.022703	0	0.022703	0.0681091
	0.703794	0.862715	1.11245	1.15785	0.885418	0.7492	1.29407	0.953527		0.272436	0.249733	0.454061	0.612982	0.703794	0.499467	0.317842	0.658388		0	0.0454061	0.0908121	0.0681091	0	0	0.022703	0.0454061
	0.703794	0.840012	1.08975	1.15785	0.840012	0.726497	1.24867	0.953527		0.272436	0.22703	0.454061	0.612982	0.703794	0.454061	0.295139	0.635685		0	0.0454061	0.0908121	0.0681091	0	0	0.022703	0.0454061
	0.681091	0.817309	1.06704	1.13515	0.817309	0.681091	1.20326	0.930824		0.249733	0.22703	0.454061	0.567576	0.681091	0.454061	0.249733	0.612982		0	0.0454061	0.0908121	0.0681091	0	0	0.022703	0.0454061
	0.658388	0.794606	1.06704	1.13515	0.794606	0.635685	1.18056	0.930824		0.249733	0.22703	0.408655	0.567576	0.658388	0.431358	0.249733	0.590279		0	0.0454061	0.0908121	0.0681091	0	0	0.022703	0.0454061
	0.658388	0.794606	1.04434	1.11245	0.7492	0.567576	1.15785	0.930824		0.249733	0.204327	0.408655	0.476764	0.612982	0.408655	0.22703	0.567576		0	0.0454061	0.0908121	0.0454061	0	0	0.022703	0.0454061
	0.635685	0.771903	1.04434	1.11245	0.7492	0.567576	1.15785	0.908121		0.22703	0.181624	0.408655	0.476764	0.590279	0.385952	0.22703	0.544873		0	0.0454061	0.0681091	0.0454061	0	0	0.022703	0.0454061
	0.590279	0.771903	1.04434	1.11245	0.7492	0.567576	1.13515	0.840012		0.22703	0.181624	0.385952	0.454061	0.544873	0.385952	0.22703	0.544873		0	0.0454061	0.0681091	0.0454061	0	0	0.022703	0.0454061
	0.590279	0.771903	1.02164	1.04434	0.726497	0.544873	1.08975	0.771903		0.204327	0.158921	0.385952	0.408655	0.544873	0.385952	0.22703	0.52217		0	0.0454061	0.0681091	0.0454061	0	0	0.022703	0.0454061
	0.590279	0.7492	1.02164	1.04434	0.703794	0.544873	1.08975	0.771903		0.204327	0.158921	0.385952	0.385952	0.52217	0.385952	0.204327	0.499467		0	0.0454061	0.0681091	0.0454061	0	0	0.022703	0.0454061
	0.567576	0.726497	0.998933	1.04434	0.681091	0.499467	1.06704	0.726497		0.204327	0.158921	0.385952	0.363248	0.499467	0.385952	0.204327	0.454061		0	0.0454061	0.0681091	0.0454061	0	0	0.022703	0.0454061
	0.567576	0.681091	0.953527	1.04434	0.658388	0.499467	0.97623	0.726497		0.204327	0.158921	0.363248	0.363248	0.476764	0.385952	0.204327	0.385952		0	0.0454061	0.0681091	0.0454061	0	0	0.022703	0.0454061
	0.567576	0.658388	0.908121	1.02164	0.658388	0.476764	0.953527	0.726497		0.204327	0.158921	0.363248	0.340545	0.476764	0.317842	0.181624	0.363248		0	0.0454061	0.0454061	0.0454061	0	0	0.022703	0.0454061
	0.567576	0.635685	0.908121	0.97623	0.635685	0.476764	0.930824	0.726497		0.204327	0.136218	0.340545	0.317842	0.454061	0.295139	0.181624	0.340545		0	0.0454061	0.0454061	0.0454061	0	0	0.022703	0.0454061
	0.544873	0.612982	0.908121	0.97623	0.612982	0.454061	0.930824	0.726497		0.181624	0.136218	0.340545	0.295139	0.408655	0.295139	0.181624	0.317842		0	0.0454061	0.0454061	0.0454061	0	0	0.022703	0.0454061
	0.52217	0.544873	0.885418	0.97623	0.612982	0.454061	0.930824	0.703794		0.181624	0.136218	0.340545	0.295139	0.385952	0.295139	0.158921	0.317842		0	0.0454061	0.0454061	0.0454061	0	0	0.022703	0.0454061
	0.499467	0.544873	0.885418	0.953527	0.590279	0.431358	0.908121	0.681091		0.158921	0.113515	0.317842	0.295139	0.317842	0.295139	0.158921	0.295139		0	0.0454061	0.0454061	0.0454061	0	0	0.022703	0.0454061
	0.454061	0.52217	0.885418	0.953527	0.590279	0.431358	0.908121	0.681091		0.136218	0.113515	0.295139	0.272436	0.317842	0.295139	0.158921	0.249733		0	0.0454061	0.0454061	0.0454061	0	0	0.022703	0.0454061
	0.408655	0.52217	0.862715	0.908121	0.567576	0.408655	0.840012	0.658388		0.136218	0.0908121	0.295139	0.272436	0.295139	0.272436	0.158921	0.249733		0	0.0454061	0.0454061	0.0454061	0	0	0.022703	0.0454061
	0.408655	0.499467	0.840012	0.908121	0.567576	0.408655	0.817309	0.658388		0.136218	0.0908121	0.295139	0.272436	0.295139	0.204327	0.158921	0.249733		0	0.0454061	0.0454061	0.0454061	0	0	0.022703	0.0454061
	0.408655	0.499467	0.817309	0.885418	0.544873	0.408655	0.771903	0.658388		0.136218	0.0908121	0.295139	0.272436	0.272436	0.204327	0.158921	0.249733		0	0.0454061	0.0454061	0.0454061	0	0	0.022703	0.0454061
	0.408655	0.499467	0.794606	0.885418	0.544873	0.385952	0.7492	0.635685		0.136218	0.0908121	0.272436	0.272436	0.249733	0.204327	0.158921	0.249733		0	0.022703	0.0454061	0.0454061	0	0	0.022703	0.0454061
	0.385952	0.499467	0.771903	0.885418	0.544873	0.385952	0.7492	0.635685		0.113515	0.0681091	0.272436	0.272436	0.249733	0.204327	0.136218	0.22703		0	0.022703	0.0454061	0.0454061	0	0	0.022703	0.022703
	0.385952	0.499467	0.771903	0.862715	0.499467	0.385952	0.726497	0.612982		0.113515	0.0681091	0.272436	0.272436	0.249733	0.204327	0.136218	0.22703		0	0.022703	0.0454061	0.0454061	0	0	0.022703	0.022703
	0.363248	0.476764	0.7492	0.840012	0.499467	0.385952	0.726497	0.590279		0.113515	0.0681091	0.272436	0.249733	0.22703	0.181624	0.136218	0.204327		0	0.022703	0.0454061	0.0454061	0	0	0.022703	0.022703
	0.363248	0.454061	0.7492	0.840012	0.476764	0.385952	0.703794	0.590279		0.113515	0.0681091	0.272436	0.249733	0.22703	0.181624	0.136218	0.204327		0	0.022703	0.0454061	0.0454061	0	0	0.022703	0.022703
	0.363248	0.408655	0.703794	0.840012	0.476764	0.363248	0.703794	0.567576		0.113515	0.0681091	0.272436	0.249733	0.204327	0.181624	0.136218	0.204327		0	0.022703	0.0454061	0.0454061	0	0	0.022703	0.022703
	0.363248	0.408655	0.681091	0.817309	0.476764	0.363248	0.703794	0.567576		0.0908121	0.0681091	0.272436	0.22703	0.204327	0.181624	0.113515	0.204327		0	0.022703	0.022703	0.0454061	0	0	0.022703	0.022703
	0.363248	0.385952	0.681091	0.817309	0.454061	0.363248	0.681091	0.567576		0.0908121	0.0454061	0.249733	0.22703	0.204327	0.158921	0.113515	0.204327		0	0.022703	0.022703	0.0454061	0	0	0.022703	0.022703
	0.363248	0.363248	0.681091	0.817309	0.454061	0.363248	0.681091	0.567576		0.0908121	0.0454061	0.249733	0.22703	0.181624	0.158921	0.113515	0.204327		0	0.022703	0.022703	0.0454061	0	0	0.022703	0.022703
	0.363248	0.340545	0.658388	0.817309	0.454061	0.340545	0.658388	0.567576		0.0908121	0.0454061	0.249733	0.204327	0.181624	0.136218	0.113515	0.181624		0	0.022703	0.022703	0.0454061	0	0	0.022703	0.022703
	0.363248	0.340545	0.658388	0.794606	0.431358	0.340545	0.658388	0.499467		0.0908121	0.0454061	0.249733	0.204327	0.181624	0.136218	0.113515	0.181624		0	0.022703	0.022703	0.0454061	0	0	0.022703	0.022703
	0.363248	0.317842	0.612982	0.794606	0.431358	0.340545	0.658388	0.499467		0.0908121	0.0454061	0.22703	0.204327	0.158921	0.136218	0.113515	0.158921		0	0.022703	0.022703	0.0454061	0	0	0.022703	0.022703
	0.340545	0.317842	0.567576	0.7492	0.431358	0.340545	0.635685	0.499467		0.0908121	0.0454061	0.204327	0.204327	0.158921	0.136218	0.0908121	0.158921		0	0.022703	0.022703	0.0454061	0	0	0.022703	0.022703
	0.340545	0.317842	0.544873	0.7492	0.408655	0.317842	0.635685	0.499467		0.0908121	0.0454061	0.204327	0.204327	0.158921	0.136218	0.0908121	0.158921		0	0.022703	0.022703	0.0454061	0	0	0.022703	0.022703
	0.317842	0.295139	0.544873	0.7492	0.385952	0.317842	0.612982	0.499467		0.0908121	0.0454061	0.204327	0.204327	0.158921	0.136218	0.0908121	0.158921		0	0.022703	0.022703	0.0454061	0	0	0.022703	0.022703
	0.317842	0.295139	0.499467	0.726497	0.385952	0.317842	0.590279	0.476764		0.0908121	0.0454061	0.181624	0.181624	0.158921	0.136218	0.0908121	0.158921		0	0.022703	0.022703	0.0454061	0	0	0.022703	0.022703
	0.317842	0.295139	0.499467	0.726497	0.385952	0.317842	0.567576	0.476764		0.0681091	0.022703	0.181624	0.181624	0.158921	0.113515	0.0908121	0.158921		0	0.022703	0.022703	0.0454061	0	0	0.022703	0.022703
	0.317842	0.295139	0.476764	0.703794	0.385952	0.295139	0.567576	0.476764		0.0681091	0.022703	0.181624	0.158921	0.136218	0.113515	0.0908121	0.158921		0	0.022703	0.022703	0.0454061	0	0	0.022703	0.022703
	0.317842	0.295139	0.431358	0.703794	0.363248	0.295139	0.544873	0.476764		0.0681091	0.022703	0.181624	0.158921	0.136218	0.113515	0.0681091	0.158921		0	0.022703	0.022703	0.0454061	0	0	0.022703	0.022703
	0.295139	0.272436	0.431358	0.703794	0.363248	0.295139	0.52217	0.454061		0.0681091	0.022703	0.181624	0.158921	0.136218	0.113515	0.0681091	0.136218		0	0.022703	0.022703	0.0454061	0	0	0.022703	0.022703
	0.295139	0.22703	0.431358	0.658388	0.363248	0.295139	0.52217	0.454061		0.0681091	0.022703	0.158921	0.158921	0.136218	0.0908121	0.0681091	0.136218		0	0.022703	0.022703	0.022703	0	0	0.022703	0.022703
	0.295139	0.22703	0.431358	0.658388	0.340545	0.295139	0.431358	0.454061		0.0681091	0.022703	0.158921	0.158921	0.136218	0.0908121	0.0681091	0.136218		0	0.022703	0.022703	0.022703	0	0	0.022703	0.022703
	0.295139	0.22703	0.431358	0.658388	0.317842	0.272436	0.431358	0.454061		0.0681091	0.022703	0.158921	0.158921	0.136218	0.0908121	0.0681091	0.136218		0	0.022703	0.022703	0.022703	0	0	0.022703	0.022703
	0.272436	0.22703	0.408655	0.658388	0.317842	0.272436	0.408655	0.431358		0.0454061	0.022703	0.158921	0.158921	0.136218	0.0908121	0.0681091	0.136218		0	0.022703	0.022703	0.022703	0	0	0.022703	0.022703
	0.272436	0.22703	0.385952	0.612982	0.317842	0.249733	0.408655	0.431358		0.0454061	0.022703	0.136218	0.158921	0.136218	0.0908121	0.0681091	0.136218		0	0.022703	0.022703	0.022703	0	0	0.022703	0.022703
	0.272436	0.22703	0.363248	0.612982	0.317842	0.249733	0.408655	0.431358		0.0454061	0.022703	0.136218	0.158921	0.136218	0.0908121	0.0681091	0.136218		0	0.022703	0.022703	0.022703	0	0	0.022703	0.022703
	0.272436	0.22703	0.363248	0.612982	0.317842	0.22703	0.385952	0.408655		0.0454061	0.022703	0.136218	0.136218	0.113515	0.0908121	0.0681091	0.113515		0	0.022703	0.022703	0.022703	0	0	0.022703	0.022703
	0.249733	0.22703	0.363248	0.590279	0.295139	0.204327	0.363248	0.385952		0.0454061	0.022703	0.136218	0.136218	0.113515	0.0908121	0.0681091	0.113515		0	0.022703	0.022703	0.022703	0	0	0.022703	0.022703
	0.249733	0.204327	0.363248	0.590279	0.295139	0.181624	0.363248	0.385952		0.022703	0.022703	0.136218	0.136218	0.113515	0.0681091	0.0681091	0.113515		0	0.022703	0.022703	0.022703	0	0	0.022703	0.022703
	0.249733	0.204327	0.363248	0.590279	0.295139	0.158921	0.340545	0.363248		0.022703	0.022703	0.136218	0.136218	0.113515	0.0681091	0.0454061	0.0908121		0	0.022703	0.022703	0.022703	0	0	0.022703	0.022703
	0.22703	0.204327	0.340545	0.590279	0.272436	0.158921	0.317842	0.363248		0.022703	0.022703	0.136218	0.136218	0.113515	0.0681091	0.0454061	0.0908121		0	0.022703	0.022703	0.022703	0	0	0.022703	0.022703
	0.22703	0.204327	0.340545	0.590279	0.272436	0.158921	0.317842	0.363248		0.022703	0	0.136218	0.136218	0.0908121	0.0681091	0.0454061	0.0908121		0	0.022703	0.022703	0.022703	0	0	0.022703	0.022703
	0.22703	0.181624	0.340545	0.567576	0.249733	0.136218	0.295139	0.363248		0.022703	0	0.113515	0.136218	0.0908121	0.0681091	0.0454061	0.0908121		0	0.022703	0.022703	0.022703	0	0	0.022703	0.022703
	0.181624	0.181624	0.317842	0.52217	0.249733	0.136218	0.295139	0.363248		0.022703	0	0.113515	0.136218	0.0908121	0.0681091	0.0454061	0.0908121		0	0.022703	0.022703	0.022703	0	0	0.022703	0.022703
	0.181624	0.181624	0.317842	0.52217	0.249733	0.113515	0.272436	0.340545		0.022703	0	0.113515	0.136218	0.0908121	0.0681091	0.0454061	0.0908121		0	0.022703	0.022703	0.022703	0	0	0.022703	0.022703
	0.181624	0.181624	0.317842	0.52217	0.249733	0.113515	0.272436	0.317842		0.022703	0	0.113515	0.136218	0.0908121	0.0681091	0.0454061	0.0908121		0	0.022703	0.022703	0.022703	0	0	0.022703	0.022703
	0.181624	0.181624	0.317842	0.499467	0.249733	0.0908121	0.249733	0.317842		0.022703	0	0.113515	0.136218	0.0908121	0.0681091	0.0454061	0.0908121		0	0.022703	0.022703	0.022703	0	0	0.022703	0.022703
	0.181624	0.181624	0.295139	0.499467	0.22703	0.0908121	0.249733	0.317842		0.022703	0	0.113515	0.136218	0.0908121	0.0454061	0.0454061	0.0681091		0	0.022703	0.022703	0.022703	0	0	0.022703	0.022703
	0.181624	0.158921	0.295139	0.499467	0.22703	0.0908121	0.204327	0.317842		0.022703	0	0.113515	0.113515	0.0908121	0.0454061	0.0454061	0.0681091		0	0.022703	0.022703	0.022703	0	0	0.022703	0.022703
	0.158921	0.158921	0.295139	0.499467	0.22703	0.0908121	0.204327	0.317842		0.022703	0	0.0908121	0.113515	0.0908121	0.0454061	0.0454061	0.0681091		0	0.022703	0.022703	0.022703	0	0	0.022703	0.022703
	0.158921	0.158921	0.295139	0.499467	0.22703	0.0681091	0.181624	0.295139		0.022703	0	0.0908121	0.113515	0.0908121	0.0454061	0.0454061	0.0681091		0	0.022703	0.022703	0.022703	0	0	0.022703	0.022703
	0.136218	0.158921	0.295139	0.476764	0.204327	0.0454061	0.181624	0.295139		0.022703	0	0.0908121	0.113515	0.0908121	0.0454061	0.0454061	0.0681091		0	0.022703	0.022703	0.022703	0	0	0.022703	0.022703
	0.136218	0.136218	0.249733	0.476764	0.204327	0.0454061	0.181624	0.295139		0.022703	0	0.0908121	0.113515	0.0681091	0.0454061	0.0454061	0.0681091		0	0.022703	0.022703	0.022703	0	0	0.022703	0.022703
	0.113515	0.136218	0.249733	0.454061	0.204327	0.0454061	0.181624	0.295139		0.022703	0	0.0908121	0.0908121	0.0681091	0.0454061	0.0454061	0.0681091		0	0.022703	0.022703	0.022703	0	0	0	0.022703
	0.113515	0.136218	0.249733	0.454061	0.204327	0.0454061	0.181624	0.272436		0.022703	0	0.0908121	0.0908121	0.0681091	0.0454061	0.0454061	0.0681091		0	0.022703	0.022703	0.022703	0	0	0	0.022703
	0.113515	0.0908121	0.22703	0.431358	0.204327	0.0454061	0.181624	0.272436		0.022703	0	0.0681091	0.0908121	0.0681091	0.022703	0.0454061	0.0681091		0	0.022703	0.022703	0.022703	0	0	0	0.022703
	0.113515	0.0908121	0.22703	0.431358	0.181624	0.0454061	0.181624	0.272436		0.022703	0	0.0681091	0.0908121	0.0681091	0.022703	0.0454061	0.0681091		0	0.022703	0.022703	0.022703	0	0	0	0.022703
	0.0908121	0.0908121	0.22703	0.431358	0.181624	0.0454061	0.181624	0.22703		0.022703	0	0.0681091	0.0908121	0.0681091	0.022703	0.0454061	0.0681091		0	0.022703	0.022703	0.022703	0	0	0	0.022703
	0.0908121	0.0908121	0.204327	0.431358	0.181624	0.0454061	0.158921	0.22703		0.022703	0	0.0681091	0.0908121	0.0681091	0.022703	0.0454061	0.0681091		0	0.022703	0.022703	0.022703	0	0	0	0.022703
	0.0908121	0.0681091	0.204327	0.431358	0.181624	0.0454061	0.158921	0.22703		0.022703	0	0.0681091	0.0908121	0.0681091	0.022703	0.022703	0.0681091		0	0.022703	0.022703	0.022703	0	0	0	0.022703
	0.0908121	0.0681091	0.204327	0.408655	0.181624	0.0454061	0.158921	0.22703		0	0	0.0681091	0.0908121	0.0681091	0.022703	0.022703	0.0681091		0	0.022703	0.022703	0.022703	0	0	0	0.022703
	0.0908121	0.0681091	0.204327	0.408655	0.181624	0.0454061	0.158921	0.22703		0	0	0.0681091	0.0908121	0.0681091	0.022703	0.022703	0.0681091		0	0.022703	0.022703	0.022703	0	0	0	0.022703
	0.0681091	0.0681091	0.204327	0.408655	0.158921	0.0454061	0.136218	0.22703		0	0	0.0681091	0.0681091	0.0681091	0.022703	0.022703	0.0681091		0	0.022703	0.022703	0.022703	0	0	0	0.022703
	0.0681091	0.0681091	0.181624	0.408655	0.158921	0.0454061	0.136218	0.204327		0	0	0.0681091	0.0681091	0.0454061	0.022703	0.022703	0.0454061		0	0.022703	0	0.022703	0	0	0	0.022703
	0.0681091	0.0454061	0.181624	0.385952	0.158921	0	0.136218	0.204327		0	0	0.0454061	0.0681091	0.0454061	0.022703	0.022703	0.0454061		0	0.022703	0	0.022703	0	0	0	0.022703
	0.0681091	0.0454061	0.181624	0.363248	0.158921	0	0.136218	0.204327		0	0	0.0454061	0.0681091	0.0454061	0.022703	0.022703	0.0454061		0	0.022703	0	0.022703	0	0	0	0.022703
	0.0681091	0.0454061	0.136218	0.363248	0.158921	0	0.113515	0.204327		0	0	0.0454061	0.0681091	0.0454061	0.022703	0.022703	0.0454061		0	0.022703	0	0.022703	0	0	0	0.022703
	0.0681091	0.0454061	0.136218	0.363248	0.158921	0	0.113515	0.204327		0	0	0.0454061	0.0681091	0.0454061	0.022703	0.022703	0.0454061		0	0.022703	0	0.022703	0	0	0	0.022703
	0.0454061	0.0454061	0.136218	0.363248	0.158921	0	0.113515	0.181624		0	0	0.0454061	0.0681091	0.0454061	0.022703	0.022703	0.0454061		0	0.022703	0	0.022703	0	0	0	0.022703
	0.0454061	0.0454061	0.113515	0.340545	0.158921	0	0.0908121	0.181624		0	0	0.0454061	0.0681091	0.0454061	0.022703	0.022703	0.0454061		0	0.022703	0	0.022703	0	0	0	0.022703
	0.0454061	0.0454061	0.113515	0.340545	0.136218	0	0.0908121	0.181624		0	0	0.0454061	0.0681091	0.0454061	0.022703	0.022703	0.0454061		0	0.022703	0	0.022703	0	0	0	0.022703
	0.0454061	0.0454061	0.113515	0.317842	0.136218	0	0.0908121	0.181624		0	0	0.0454061	0.0681091	0.0454061	0.022703	0.022703	0.0454061		0	0.022703	0	0.022703	0	0	0	0.022703
	0.0454061	0.0454061	0.0908121	0.317842	0.136218	0	0.0908121	0.158921		0	0	0.0454061	0.0454061	0.0454061	0.022703	0.022703	0.0454061		0	0.022703	0	0.022703	0	0	0	0.022703
	0.0454061	0.0454061	0.0908121	0.317842	0.136218	0	0.0908121	0.158921		0	0	0.0454061	0.0454061	0.0454061	0.022703	0.022703	0.0454061		0	0.022703	0	0.022703	0	0	0	0.022703
	0.0454061	0.0454061	0.0908121	0.317842	0.136218	0	0.0908121	0.158921		0	0	0.0454061	0.0454061	0.0454061	0.022703	0.022703	0.0454061		0	0.022703	0	0.022703	0	0	0	0.022703
	0.0454061	0.0454061	0.0908121	0.317842	0.136218	0	0.0908121	0.158921		0	0	0.0454061	0.0454061	0.0454061	0.022703	0.022703	0.0454061		0	0.022703	0	0.022703	0	0	0	0.022703
	0.0454061	0.0454061	0.0908121	0.295139	0.136218	0	0.0908121	0.158921		0	0	0.0454061	0.0454061	0.0454061	0.022703	0.022703	0.0454061		0	0.022703	0	0.022703	0	0	0	0.022703
	0.0454061	0	0.0681091	0.295139	0.136218	0	0.0681091	0.158921		0	0	0.022703	0.0454061	0.0454061	0.022703	0.022703	0.0454061		0	0.022703	0	0.022703	0	0	0	0.022703
	0	0	0.0681091	0.295139	0.113515	0	0.0681091	0.158921		0	0	0.022703	0.0454061	0.0454061	0.022703	0.022703	0.0454061		0	0.022703	0	0.022703	0	0	0	0.022703
	0	0	0.0681091	0.295139	0.113515	0	0.0681091	0.158921		0	0	0.022703	0.0454061	0.0454061	0.022703	0.022703	0.022703		0	0.022703	0	0.022703	0	0	0	0.022703
	0	0	0.0454061	0.295139	0.113515	0	0.0681091	0.136218		0	0	0.022703	0.0454061	0.0454061	0.022703	0.022703	0.022703		0	0.022703	0	0.022703	0	0	0	0.022703
	0	0	0.0454061	0.295139	0.113515	0	0.0681091	0.136218		0	0	0.022703	0.0454061	0.0454061	0.022703	0.022703	0.022703		0	0.022703	0	0.022703	0	0	0	0.022703
	0	0	0.0454061	0.295139	0.113515	0	0.0681091	0.113515		0	0	0.022703	0.0454061	0.0454061	0.022703	0.022703	0.022703		0	0.022703	0	0.022703	0	0	0	0.022703
	0	0	0	0.295139	0.113515	0	0.0454061	0.113515		0	0	0.022703	0.0454061	0.0454061	0.022703	0.022703	0.022703		0	0.022703	0	0.022703	0	0	0	0.022703
	0	0	0	0.272436	0.113515	0	0.0454061	0.113515		0	0	0.022703	0.0454061	0.0454061	0.022703	0.022703	0.022703		0	0.022703	0	0.022703	0	0	0	0.022703
	0	0	0	0.272436	0.0908121	0	0.0454061	0.113515		0	0	0.022703	0.0454061	0.0454061	0.022703	0.022703	0.022703		0	0.022703	0	0.022703	0	0	0	0.022703
	0	0	0	0.249733	0.0908121	0	0.0454061	0.113515		0	0	0.022703	0.0454061	0.0454061	0.022703	0.022703	0.022703		0	0.022703	0	0.022703	0	0	0	0.022703
	0	0	0	0.249733	0.0908121	0	0.0454061	0.113515		0	0	0.022703	0.0454061	0.0454061	0.022703	0.022703	0.022703		0	0.022703	0	0.022703	0	0	0	0.022703
	0	0	0	0.249733	0.0908121	0	0.0454061	0.0908121		0	0	0.022703	0.0454061	0.0454061	0.022703	0.022703	0.022703		0	0.022703	0	0.022703	0	0	0	0.022703
	0	0	0	0.249733	0.0908121	0	0.0454061	0.0908121		0	0	0.022703	0.0454061	0.0454061	0.022703	0.022703	0.022703		0	0	0	0.022703	0	0	0	0.022703
	0	0	0	0.22703	0.0908121	0	0.0454061	0.0908121		0	0	0.022703	0.0454061	0.0454061	0.022703	0.022703	0.022703		0	0	0	0.022703	0	0	0	0.022703
	0	0	0	0.204327	0.0908121	0	0.0454061	0.0908121		0	0	0.022703	0.0454061	0.022703	0.022703	0.022703	0.022703		0	0	0	0.022703	0	0	0	0.022703
	0	0	0	0.204327	0.0908121	0	0.0454061	0.0908121		0	0	0.022703	0.0454061	0.022703	0.022703	0.022703	0.022703		0	0	0	0.022703	0	0	0	0.022703
	0	0	0	0.204327	0.0908121	0	0.0454061	0.0908121		0	0	0.022703	0.0454061	0.022703	0.022703	0.022703	0.022703		0	0	0	0.022703	0	0	0	0.022703
	0	0	0	0.181624	0.0681091	0	0.0454061	0.0908121		0	0	0.022703	0.0454061	0.022703	0.022703	0.022703	0.022703		0	0	0	0.022703	0	0	0	0.022703
	0	0	0	0.181624	0.0681091	0	0.0454061	0.0908121		0	0	0.022703	0.022703	0.022703	0.022703	0.022703	0.022703		0	0	0	0.022703	0	0	0	0.022703
	0	0	0	0.181624	0.0681091	0	0.0454061	0.0681091		0	0	0.022703	0.022703	0.022703	0.022703	0.022703	0.022703		0	0	0	0.022703	0	0	0	0.022703
	0	0	0	0.181624	0.0681091	0	0.0454061	0.0681091		0	0	0.022703	0.022703	0.022703	0.022703	0.022703	0.022703		0	0	0	0.022703	0	0	0	0.022703
	0	0	0	0.158921	0.0681091	0	0.0454061	0.0681091		0	0	0.022703	0.022703	0.022703	0.022703	0.022703	0.022703		0	0	0	0.022703	0	0	0	0.022703
	0	0	0	0.136218	0.0681091	0	0.0454061	0.0681091		0	0	0.022703	0.022703	0.022703	0.022703	0.022703	0.022703		0	0	0	0.022703	0	0	0	0.022703
	0	0	0	0.136218	0.0454061	0	0	0.0681091		0	0	0.022703	0.022703	0.022703	0.022703	0.022703	0.022703		0	0	0	0.022703	0	0	0	0.022703
	0	0	0	0.136218	0.0454061	0	0	0.0681091		0	0	0.022703	0.022703	0.022703	0.022703	0.022703	0.022703		0	0	0	0.022703	0	0	0	0.022703
	0	0	0	0.113515	0.0454061	0	0	0.0681091		0	0	0.022703	0.022703	0.022703	0.022703	0.022703	0.022703		0	0	0	0.022703	0	0	0	0.022703
	0	0	0	0.113515	0.0454061	0	0	0.0681091		0	0	0.022703	0.022703	0.022703	0.022703	0.022703	0.022703		0	0	0	0.022703	0	0	0	0.022703
	0	0	0	0.113515	0.0454061	0	0	0.0681091		0	0	0.022703	0.022703	0.022703	0.022703	0.022703	0.022703		0	0	0	0.022703	0	0	0	0.022703
	0	0	0	0.113515	0.0454061	0	0	0.0681091		0	0	0.022703	0.022703	0.022703	0.022703	0.022703	0.022703		0	0	0	0.022703	0	0	0	0.022703
	0	0	0	0.113515	0.0454061	0	0	0.0454061		0	0	0.022703	0.022703	0.022703	0.022703	0.022703	0.022703		0	0	0	0.022703	0	0	0	0.022703
	0	0	0	0.0908121	0.0454061	0	0	0.0454061		0	0	0.022703	0.022703	0.022703	0.022703	0.022703	0.022703		0	0	0	0.022703	0	0	0	0.022703
	0	0	0	0.0908121	0.0454061	0	0	0.0454061		0	0	0.022703	0.022703	0.022703	0.022703	0.022703	0.022703		0	0	0	0.022703	0	0	0	0.022703
	0	0	0	0.0908121	0.0454061	0	0	0		0	0	0.022703	0.022703	0.022703	0.022703	0.022703	0.022703		0	0	0	0.022703	0	0	0	0.022703
	0	0	0	0.0908121	0.0454061	0	0	0		0	0	0.022703	0.022703	0.022703	0.022703	0.022703	0.022703		0	0	0	0.022703	0	0	0	0.022703
	0	0	0	0.0908121	0.0454061	0	0	0		0	0	0.022703	0.022703	0.022703	0.022703	0.022703	0.022703		0	0	0	0.022703	0	0	0	0.022703
	0	0	0	0.0908121	0.0454061	0	0	0		0	0	0.022703	0.022703	0.022703	0.022703	0.022703	0.022703		0	0	0	0.022703	0	0	0	0.022703
	0	0	0	0.0908121	0	0	0	0		0	0	0.022703	0.022703	0.022703	0.022703	0.022703	0.022703		0	0	0	0.022703	0	0	0	0.022703
	0	0	0	0.0908121	0	0	0	0		0	0	0.022703	0.022703	0.022703	0.022703	0.022703	0.022703		0	0	0	0.022703	0	0	0	0.022703
	0	0	0	0.0681091	0	0	0	0		0	0	0.022703	0.022703	0.022703	0.022703	0.022703	0.022703		0	0	0	0.022703	0	0	0	0.022703
	0	0	0	0.0681091	0	0	0	0		0	0	0.022703	0.022703	0.022703	0.022703	0.022703	0.022703		0	0	0	0.022703	0	0	0	0.022703
	0	0	0	0.0681091	0	0	0	0		0	0	0.022703	0.022703	0.022703	0.022703	0.022703	0.022703		0	0	0	0.022703	0	0	0	0.022703
	0	0	0	0.0681091	0	0	0	0		0	0	0.022703	0.022703	0.022703	0.022703	0.022703	0.022703		0	0	0	0.022703	0	0	0	0.022703
	0	0	0	0.0681091	0	0	0	0		0	0	0.022703	0.022703	0.022703	0.022703	0.022703	0.022703		0	0	0	0.022703	0	0	0	0.022703
	0	0	0	0.0454061	0	0	0	0		0	0	0.022703	0.022703	0.022703	0	0.022703	0.022703		0	0	0	0.022703	0	0	0	0.022703
	0	0	0	0.0454061	0	0	0	0		0	0	0.022703	0.022703	0.022703	0	0.022703	0.022703		0	0	0	0.022703	0	0	0	0.022703
	0	0	0	0.0454061	0	0	0	0		0	0	0.022703	0.022703	0.022703	0	0.022703	0.022703		0	0	0	0.022703	0	0	0	0.022703
	0	0	0	0.0454061	0	0	0	0		0	0	0.022703	0.022703	0.022703	0	0.022703	0.022703		0	0	0	0.022703	0	0	0	0.022703
	0	0	0	0.0454061	0	0	0	0		0	0	0	0.022703	0.022703	0	0.022703	0.022703		0	0	0	0.022703	0	0	0	0.022703
	0	0	0	0.0454061	0	0	0	0		0	0	0	0.022703	0.022703	0	0.022703	0.022703		0	0	0	0.022703	0	0	0	0
	0	0	0	0.0454061	0	0	0	0		0	0	0	0.022703	0.022703	0	0.022703	0.022703		0	0	0	0.022703	0	0	0	0
	0	0	0	0	0	0	0	0		0	0	0	0.022703	0.022703	0	0.022703	0.022703		0	0	0	0.022703	0	0	0	0
	0	0	0	0	0	0	0	0		0	0	0	0.022703	0.022703	0	0	0.022703		0	0	0	0.022703	0	0	0	0
	0	0	0	0	0	0	0	0		0	0	0	0.022703	0.022703	0	0	0.022703		0	0	0	0.022703	0	0	0	0
	0	0	0	0	0	0	0	0		0	0	0	0.022703	0.022703	0	0	0.022703		0	0	0	0.022703	0	0	0	0
	0	0	0	0	0	0	0	0		0	0	0	0.022703	0.022703	0	0	0.022703		0	0	0	0.022703	0	0	0	0
	0	0	0	0	0	0	0	0		0	0	0	0.022703	0.022703	0	0	0.022703		0	0	0	0.022703	0	0	0	0
	0	0	0	0	0	0	0	0		0	0	0	0.022703	0.022703	0	0	0.022703		0	0	0	0.022703	0	0	0	0
	0	0	0	0	0	0	0	0		0	0	0	0.022703	0.022703	0	0	0.022703		0	0	0	0.022703	0	0	0	0
	0	0	0	0	0	0	0	0		0	0	0	0.022703	0.022703	0	0	0.022703		0	0	0	0.022703	0	0	0	0
	0	0	0	0	0	0	0	0		0	0	0	0.022703	0.022703	0	0	0.022703		0	0	0	0.022703	0	0	0	0
	0	0	0	0	0	0	0	0		0	0	0	0.022703	0.022703	0	0	0.022703		0	0	0	0.022703	0	0	0	0
	0	0	0	0	0	0	0	0		0	0	0	0.022703	0.022703	0	0	0.022703		0	0	0	0.022703	0	0	0	0
	0	0	0	0	0	0	0	0		0	0	0	0.022703	0.022703	0	0	0.022703		0	0	0	0.022703	0	0	0	0
	0	0	0	0	0	0	0	0		0	0	0	0.022703	0.022703	0	0	0.022703		0	0	0	0.022703	0	0	0	0
	0	0	0	0	0	0	0	0		0	0	0	0.022703	0.022703	0	0	0.022703		0	0	0	0.022703	0	0	0	0
	0	0	0	0	0	0	0	0		0	0	0	0.022703	0.022703	0	0	0.022703		0	0	0	0.022703	0	0	0	0
	0	0	0	0	0	0	0	0		0	0	0	0.022703	0.022703	0	0	0.022703		0	0	0	0.022703	0	0	0	0
	0	0	0	0	0	0	0	0		0	0	0	0.022703	0.022703	0	0	0.022703		0	0	0	0.022703	0	0	0	0
	0	0	0	0	0	0	0	0		0	0	0	0.022703	0.022703	0	0	0.022703		0	0	0	0.022703	0	0	0	0
	0	0	0	0	0	0	0	0		0	0	0	0.022703	0.022703	0	0	0.022703		0	0	0	0.022703	0	0	0	0
	0	0	0	0	0	0	0	0		0	0	0	0.022703	0.022703	0	0	0.022703		0	0	0	0.022703	0	0	0	0
	0	0	0	0	0	0	0	0		0	0	0	0.022703	0.022703	0	0	0.022703		0	0	0	0.022703	0	0	0	0
	0	0	0	0	0	0	0	0		0	0	0	0.022703	0.022703	0	0	0.022703		0	0	0	0.022703	0	0	0	0
	0	0	0	0	0	0	0	0		0	0	0	0.022703	0.022703	0	0	0.022703		0	0	0	0.022703	0	0	0	0
	0	0	0	0	0	0	0	0		0	0	0	0.022703	0.022703	0	0	0.022703		0	0	0	0.022703	0	0	0	0
	0	0	0	0	0	0	0	0		0	0	0	0.022703	0.022703	0	0	0.022703		0	0	0	0.022703	0	0	0	0
	0	0	0	0	0	0	0	0		0	0	0	0.022703	0.022703	0	0	0.022703		0	0	0	0.022703	0	0	0	0
	0	0	0	0	0	0	0	0		0	0	0	0.022703	0.022703	0	0	0.022703		0	0	0	0.022703	0	0	0	0
	0	0	0	0	0	0	0	0		0	0	0	0.022703	0.022703	0	0	0.022703		0	0	0	0.022703	0	0	0	0
	0	0	0	0	0	0	0	0		0	0	0	0.022703	0.022703	0	0	0.022703		0	0	0	0.022703	0	0	0	0
	0	0	0	0	0	0	0	0		0	0	0	0.022703	0.022703	0	0	0.022703		0	0	0	0.022703	0	0	0	0
	0	0	0	0	0	0	0	0		0	0	0	0.022703	0.022703	0	0	0.022703		0	0	0	0.022703	0	0	0	0
	0	0	0	0	0	0	0	0		0	0	0	0.022703	0.022703	0	0	0		0	0	0	0.022703	0	0	0	0
	0	0	0	0	0	0	0	0		0	0	0	0.022703	0.022703	0	0	0		0	0	0	0.022703	0	0	0	0
	0	0	0	0	0	0	0	0		0	0	0	0.022703	0.022703	0	0	0		0	0	0	0.022703	0	0	0	0
	0	0	0	0	0	0	0	0		0	0	0	0.022703	0.022703	0	0	0		0	0	0	0.022703	0	0	0	0
	0	0	0	0	0	0	0	0		0	0	0	0	0.022703	0	0	0		0	0	0	0.022703	0	0	0	0
	0	0	0	0	0	0	0	0		0	0	0	0	0.022703	0	0	0		0	0	0	0.022703	0	0	0	0
	0	0	0	0	0	0	0	0		0	0	0	0	0.022703	0	0	0		0	0	0	0.022703	0	0	0	0
	0	0	0	0	0	0	0	0		0	0	0	0	0	0	0	0		0	0	0	0.022703	0	0	0	0
	0	0	0	0	0	0	0	0		0	0	0	0	0	0	0	0		0	0	0	0.022703	0	0	0	0
	0	0	0	0	0	0	0	0		0	0	0	0	0	0	0	0		0	0	0	0.022703	0	0	0	0
	0	0	0	0	0	0	0	0		0	0	0	0	0	0	0	0		0	0	0	0.022703	0	0	0	0
	0	0	0	0	0	0	0	0		0	0	0	0	0	0	0	0		0	0	0	0.022703	0	0	0	0
	0	0	0	0	0	0	0	0		0	0	0	0	0	0	0	0		0	0	0	0.022703	0	0	0	0
	0	0	0	0	0	0	0	0		0	0	0	0	0	0	0	0		0	0	0	0.022703	0	0	0	0
	0	0	0	0	0	0	0	0		0	0	0	0	0	0	0	0		0	0	0	0.022703	0	0	0	0
	0	0	0	0	0	0	0	0		0	0	0	0	0	0	0	0		0	0	0	0.022703	0	0	0	0
	0	0	0	0	0	0	0	0		0	0	0	0	0	0	0	0		0	0	0	0.022703	0	0	0	0
	0	0	0	0	0	0	0	0		0	0	0	0	0	0	0	0		0	0	0	0.022703	0	0	0	0
	0	0	0	0	0	0	0	0		0	0	0	0	0	0	0	0		0	0	0	0.022703	0	0	0	0
	0	0	0	0	0	0	0	0		0	0	0	0	0	0	0	0		0	0	0	0.022703	0	0	0	0
	0	0	0	0	0	0	0	0		0	0	0	0	0	0	0	0		0	0	0	0.022703	0	0	0	0
	0	0	0	0	0	0	0	0		0	0	0	0	0	0	0	0		0	0	0	0.022703	0	0	0	0
	0	0	0	0	0	0	0	0		0	0	0	0	0	0	0	0		0	0	0	0.022703	0	0	0	0
	0	0	0	0	0	0	0	0		0	0	0	0	0	0	0	0		0	0	0	0.022703	0	0	0	0
	0	0	0	0	0	0	0	0		0	0	0	0	0	0	0	0		0	0	0	0.022703	0	0	0	0
	0	0	0	0	0	0	0	0		0	0	0	0	0	0	0	0		0	0	0	0.022703	0	0	0	0
	0	0	0	0	0	0	0	0		0	0	0	0	0	0	0	0		0	0	0	0.022703	0	0	0	0
	0	0	0	0	0	0	0	0		0	0	0	0	0	0	0	0		0	0	0	0.022703	0	0	0	0
	0	0	0	0	0	0	0	0		0	0	0	0	0	0	0	0		0	0	0	0.022703	0	0	0	0
	0	0	0	0	0	0	0	0		0	0	0	0	0	0	0	0		0	0	0	0.022703	0	0	0	0
	0	0	0	0	0	0	0	0		0	0	0	0	0	0	0	0		0	0	0	0.022703	0	0	0	0
	0	0	0	0	0	0	0	0		0	0	0	0	0	0	0	0		0	0	0	0.022703	0	0	0	0
	0	0	0	0	0	0	0	0		0	0	0	0	0	0	0	0		0	0	0	0.022703	0	0	0	0
	0	0	0	0	0	0	0	0		0	0	0	0	0	0	0	0		0	0	0	0.022703	0	0	0	0
	0	0	0	0	0	0	0	0		0	0	0	0	0	0	0	0		0	0	0	0.022703	0	0	0	0
	0	0	0	0	0	0	0	0		0	0	0	0	0	0	0	0		0	0	0	0.022703	0	0	0	0
	0	0	0	0	0	0	0	0		0	0	0	0	0	0	0	0		0	0	0	0.022703	0	0	0	0
	0	0	0	0	0	0	0	0		0	0	0	0	0	0	0	0		0	0	0	0.022703	0	0	0	0
	0	0	0	0	0	0	0	0		0	0	0	0	0	0	0	0		0	0	0	0.022703	0	0	0	0
	0	0	0	0	0	0	0	0		0	0	0	0	0	0	0	0		0	0	0	0.022703	0	0	0	0
	0	0	0	0	0	0	0	0		0	0	0	0	0	0	0	0		0	0	0	0.022703	0	0	0	0
	0	0	0	0	0	0	0	0		0	0	0	0	0	0	0	0		0	0	0	0.022703	0	0	0	0
	0	0	0	0	0	0	0	0		0	0	0	0	0	0	0	0		0	0	0	0.022703	0	0	0	0
	0	0	0	0	0	0	0	0		0	0	0	0	0	0	0	0		0	0	0	0.022703	0	0	0	0
	0	0	0	0	0	0	0	0		0	0	0	0	0	0	0	0		0	0	0	0.022703	0	0	0	0
	0	0	0	0	0	0	0	0		0	0	0	0	0	0	0	0		0	0	0	0.022703	0	0	0	0
	0	0	0	0	0	0	0	0		0	0	0	0	0	0	0	0		0	0	0	0.022703	0	0	0	0
	0	0	0	0	0	0	0	0		0	0	0	0	0	0	0	0		0	0	0	0.022703	0	0	0	0
	0	0	0	0	0	0	0	0		0	0	0	0	0	0	0	0		0	0	0	0.022703	0	0	0	0
	0	0	0	0	0	0	0	0		0	0	0	0	0	0	0	0		0	0	0	0.022703	0	0	0	0
	0	0	0	0	0	0	0	0		0	0	0	0	0	0	0	0		0	0	0	0.022703	0	0	0	0
	0	0	0	0	0	0	0	0		0	0	0	0	0	0	0	0		0	0	0	0.022703	0	0	0	0
	0	0	0	0	0	0	0	0		0	0	0	0	0	0	0	0		0	0	0	0.022703	0	0	0	0
	0	0	0	0	0	0	0	0		0	0	0	0	0	0	0	0		0	0	0	0.022703	0	0	0	0
	0	0	0	0	0	0	0	0		0	0	0	0	0	0	0	0		0	0	0	0.022703	0	0	0	0
	0	0	0	0	0	0	0	0		0	0	0	0	0	0	0	0		0	0	0	0.022703	0	0	0	0
	0	0	0	0	0	0	0	0		0	0	0	0	0	0	0	0		0	0	0	0.022703	0	0	0	0
	0	0	0	0	0	0	0	0		0	0	0	0	0	0	0	0		0	0	0	0.022703	0	0	0	0
	0	0	0	0	0	0	0	0		0	0	0	0	0	0	0	0		0	0	0	0.022703	0	0	0	0
	0	0	0	0	0	0	0	0		0	0	0	0	0	0	0	0		0	0	0	0.022703	0	0	0	0
	0	0	0	0	0	0	0	0		0	0	0	0	0	0	0	0		0	0	0	0.022703	0	0	0	0
	0	0	0	0	0	0	0	0		0	0	0	0	0	0	0	0		0	0	0	0.022703	0	0	0	0
	0	0	0	0	0	0	0	0		0	0	0	0	0	0	0	0		0	0	0	0.022703	0	0	0	0
	0	0	0	0	0	0	0	0		0	0	0	0	0	0	0	0		0	0	0	0.022703	0	0	0	0
	0	0	0	0	0	0	0	0		0	0	0	0	0	0	0	0		0	0	0	0.022703	0	0	0	0
	0	0	0	0	0	0	0	0		0	0	0	0	0	0	0	0		0	0	0	0.022703	0	0	0	0
	0	0	0	0	0	0	0	0		0	0	0	0	0	0	0	0		0	0	0	0.022703	0	0	0	0
	0	0	0	0	0	0	0	0		0	0	0	0	0	0	0	0		0	0	0	0.022703	0	0	0	0
	0	0	0	0	0	0	0	0		0	0	0	0	0	0	0	0		0	0	0	0.022703	0	0	0	0
	0	0	0	0	0	0	0	0		0	0	0	0	0	0	0	0		0	0	0	0.022703	0	0	0	0
	0	0	0	0	0	0	0	0		0	0	0	0	0	0	0	0		0	0	0	0.022703	0	0	0	0
	0	0	0	0	0	0	0	0		0	0	0	0	0	0	0	0		0	0	0	0.022703	0	0	0	0
	0	0	0	0	0	0	0	0		0	0	0	0	0	0	0	0		0	0	0	0.022703	0	0	0	0
	0	0	0	0	0	0	0	0		0	0	0	0	0	0	0	0		0	0	0	0.022703	0	0	0	0
	0	0	0	0	0	0	0	0		0	0	0	0	0	0	0	0		0	0	0	0.022703	0	0	0	0
	0	0	0	0	0	0	0	0		0	0	0	0	0	0	0	0		0	0	0	0.022703	0	0	0	0
	0	0	0	0	0	0	0	0		0	0	0	0	0	0	0	0		0	0	0	0.022703	0	0	0	0
	0	0	0	0	0	0	0	0		0	0	0	0	0	0	0	0		0	0	0	0.022703	0	0	0	0
	0	0	0	0	0	0	0	0		0	0	0	0	0	0	0	0		0	0	0	0.022703	0	0	0	0
	0	0	0	0	0	0	0	0		0	0	0	0	0	0	0	0		0	0	0	0.022703	0	0	0	0
	0	0	0	0	0	0	0	0		0	0	0	0	0	0	0	0		0	0	0	0.022703	0	0	0	0
	0	0	0	0	0	0	0	0		0	0	0	0	0	0	0	0		0	0	0	0.022703	0	0	0	0
	0	0	0	0	0	0	0	0		0	0	0	0	0	0	0	0		0	0	0	0.022703	0	0	0	0
	0	0	0	0	0	0	0	0		0	0	0	0	0	0	0	0		0	0	0	0.022703	0	0	0	0
	0	0	0	0	0	0	0	0		0	0	0	0	0	0	0	0		0	0	0	0.022703	0	0	0	0
	0	0	0	0	0	0	0	0		0	0	0	0	0	0	0	0		0	0	0	0.022703	0	0	0	0
	0	0	0	0	0	0	0	0		0	0	0	0	0	0	0	0		0	0	0	0.022703	0	0	0	0
	0	0	0	0	0	0	0	0		0	0	0	0	0	0	0	0		0	0	0	0.022703	0	0	0	0
	0	0	0	0	0	0	0	0		0	0	0	0	0	0	0	0		0	0	0	0.022703	0	0	0	0
	0	0	0	0	0	0	0	0		0	0	0	0	0	0	0	0		0	0	0	0.022703	0	0	0	0
	0	0	0	0	0	0	0	0		0	0	0	0	0	0	0	0		0	0	0	0.022703	0	0	0	0
	0	0	0	0	0	0	0	0		0	0	0	0	0	0	0	0		0	0	0	0.022703	0	0	0	0
	0	0	0	0	0	0	0	0		0	0	0	0	0	0	0	0		0	0	0	0.022703	0	0	0	0
	0	0	0	0	0	0	0	0		0	0	0	0	0	0	0	0		0	0	0	0.022703	0	0	0	0
	0	0	0	0	0	0	0	0		0	0	0	0	0	0	0	0		0	0	0	0.022703	0	0	0	0
	0	0	0	0	0	0	0	0		0	0	0	0	0	0	0	0		0	0	0	0.022703	0	0	0	0
	0	0	0	0	0	0	0	0		0	0	0	0	0	0	0	0		0	0	0	0.022703	0	0	0	0
	0	0	0	0	0	0	0	0		0	0	0	0	0	0	0	0		0	0	0	0.022703	0	0	0	0
	0	0	0	0	0	0	0	0		0	0	0	0	0	0	0	0		0	0	0	0.022703	0	0	0	0
	0	0	0	0	0	0	0	0		0	0	0	0	0	0	0	0		0	0	0	0.022703	0	0	0	0
	0	0	0	0	0	0	0	0		0	0	0	0	0	0	0	0		0	0	0	0.022703	0	0	0	0
	0	0	0	0	0	0	0	0		0	0	0	0	0	0	0	0		0	0	0	0.022703	0	0	0	0
	0	0	0	0	0	0	0	0		0	0	0	0	0	0	0	0		0	0	0	0.022703	0	0	0	0
	0	0	0	0	0	0	0	0		0	0	0	0	0	0	0	0		0	0	0	0.022703	0	0	0	0
	0	0	0	0	0	0	0	0		0	0	0	0	0	0	0	0		0	0	0	0.022703	0	0	0	0
	0	0	0	0	0	0	0	0		0	0	0	0	0	0	0	0		0	0	0	0.022703	0	0	0	0
	0	0	0	0	0	0	0	0		0	0	0	0	0	0	0	0		0	0	0	0.022703	0	0	0	0
	0	0	0	0	0	0	0	0		0	0	0	0	0	0	0	0		0	0	0	0.022703	0	0	0	0
	0	0	0	0	0	0	0	0		0	0	0	0	0	0	0	0		0	0	0	0.022703	0	0	0	0
	0	0	0	0	0	0	0	0		0	0	0	0	0	0	0	0		0	0	0	0.022703	0	0	0	0
	0	0	0	0	0	0	0	0		0	0	0	0	0	0	0	0		0	0	0	0.022703	0	0	0	0
	0	0	0	0	0	0	0	0		0	0	0	0	0	0	0	0		0	0	0	0.022703	0	0	0	0
	0	0	0	0	0	0	0	0		0	0	0	0	0	0	0	0		0	0	0	0.022703	0	0	0	0
	0	0	0	0	0	0	0	0		0	0	0	0	0	0	0	0		0	0	0	0.022703	0	0	0	0
	0	0	0	0	0	0	0	0		0	0	0	0	0	0	0	0		0	0	0	0.022703	0	0	0	0
	0	0	0	0	0	0	0	0		0	0	0	0	0	0	0	0		0	0	0	0.022703	0	0	0	0
	0	0	0	0	0	0	0	0		0	0	0	0	0	0	0	0		0	0	0	0.022703	0	0	0	0
	0	0	0	0	0	0	0	0		0	0	0	0	0	0	0	0		0	0	0	0.022703	0	0	0	0
	0	0	0	0	0	0	0	0		0	0	0	0	0	0	0	0		0	0	0	0.022703	0	0	0	0
	0	0	0	0	0	0	0	0		0	0	0	0	0	0	0	0		0	0	0	0.022703	0	0	0	0
	0	0	0	0	0	0	0	0		0	0	0	0	0	0	0	0		0	0	0	0.022703	0	0	0	0
	0	0	0	0	0	0	0	0		0	0	0	0	0	0	0	0		0	0	0	0.022703	0	0	0	0
	0	0	0	0	0	0	0	0		0	0	0	0	0	0	0	0		0	0	0	0.022703	0	0	0	0
	0	0	0	0	0	0	0	0		0	0	0	0	0	0	0	0		0	0	0	0.022703	0	0	0	0
	0	0	0	0	0	0	0	0		0	0	0	0	0	0	0	0		0	0	0	0.022703	0	0	0	0
	0	0	0	0	0	0	0	0		0	0	0	0	0	0	0	0		0	0	0	0.022703	0	0	0	0
	0	0	0	0	0	0	0	0		0	0	0	0	0	0	0	0		0	0	0	0.022703	0	0	0	0
	0	0	0	0	0	0	0	0		0	0	0	0	0	0	0	0		0	0	0	0.022703	0	0	0	0
	0	0	0	0	0	0	0	0		0	0	0	0	0	0	0	0		0	0	0	0.022703	0	0	0	0
	0	0	0	0	0	0	0	0		0	0	0	0	0	0	0	0		0	0	0	0.022703	0	0	0	0
