# Supplementary material for: Host casein kinase 1-mediated phosphorylation modulates phase separation of a rhabdovirus phosphoprotein and virus infection
Source: eLife journal article supplement (doi:10.7554/elife.74884), 2022-02-22
Supplement: supp [file Figure 6C-source datas.xlsx]

## Sheet: Sheet1
	Variable	Repeats
		1	2	3	Mean	SEM
	GFP-PWT	1	1	1	1	0
	GFP-PS5A	2.65027	2.60369	1.9168	2.39026	0.410684
	GFP-PS5D	0.54322	0.59243	0.336341	0.490664	0.135893
	t-test	Summary	Adjusted P Value
	GFP-PWT vs. GFP-PS5A	**	0.0042
	GFP-PWT vs. GFP-PS5D	**	0.0029
