# Supplementary material for: Host casein kinase 1-mediated phosphorylation modulates phase separation of a rhabdovirus phosphoprotein and virus infection
Source: eLife journal article supplement (doi:10.7554/elife.74884), 2022-02-22
Supplement: supp [file Figure 6D-source datas.xlsx]

## Sheet: Sheet1
	Variable	Repeats
		1	2	3	Mean	SEM
	GFP-PWT	1	1	1	1	0
	GFP-PS5A	0.571666	0.400992	0.374592	0.449084	0.106977
	GFP-PS5D	2.34957	1.72972	2.94028	2.33986	0.605338
	t-test	Summary	Adjusted P Value
	GFP-PWT vs. GFP-PS5A	***	0.0009
	GFP-PWT vs. GFP-PS5D	*	0.0186
